# Supplementary material for: Using Principal Component Analysis and RNA-Seq to Identify Candidate Genes That Control Salt Tolerance in Garlic (Allium sativum L.)
Source: MDPI journal article supplement (doi:10.3390/agronomy11040691), 2021-04-05
Supplement: s1 [file s1]

## Supplementary Table S5. KEGG enrichment analysis of the DEGs from the salt-tolerant accession

KEGG analysis of the upregulated DEGs in leaves

| Pathway                                                        | No. of total gene | No. of genes annotated in this KEGG pathway | No. of gene in the group | No. of gene in the group annotated in this KEGG pathway | GeneID                                                                                                                                                                                                                                                                                                                                               | Pvalue      | adjusted P  |
|----------------------------------------------------------------|-------------------|---------------------------------------------|--------------------------|---------------------------------------------------------|------------------------------------------------------------------------------------------------------------------------------------------------------------------------------------------------------------------------------------------------------------------------------------------------------------------------------------------------------|-------------|-------------|
| map00230#Purine metabolism                                     | 57,561            | 160                                         | 1,282                    | 11                                                      | Asa4G03389;Asa0G04496;Asa0G04495;Asa5G02091;Asa7G03315;Asa4G02964;Asa7G02005;Asa7G02004;Asa5G04860;Asa7G01317;Asa0G01801                                                                                                                                                                                                                             | 9.77E-04    | 0.014310219 |
| map00480#Glutathione metabolism                                | 57,561            | 220                                         | 1,282                    | 15                                                      | Asa7G00330;AsaUG04572;Asa7G07253;Asa7G06688;Asa7G06686;Asa4G03523;Asa2G05187;Asa1G04603;Asa6G02190;Asa5G01517;Asa8G04503;Asa7G02005;Asa7G02004;Asa7G00327;Asa7G01317                                                                                                                                                                                 | 1.41E-04    | 0.003202297 |
| map00591#Linoleic acid metabolism                              | 57,561            | 23                                          | 1,282                    | 4                                                       | Asa5G01565;Asa7G02600;Asa5G01566;Asa0G04870                                                                                                                                                                                                                                                                                                          | 0.001546539 | 0.018649436 |
| map00940#Phenylpropanoid biosynthesis                          | 57,561            | 377                                         | 1,282                    | 17                                                      | Asa3G04675;Asa3G01193;Asa2G02799;Asa2G02798;Asa3G03680;Asa8G03279;Asa7G04348;Asa6G02190;Asa3G00985;Asa2G02806;Asa2G06961;Asa8G02502;Asa8G02509;Asa5G02813;Asa8G04999;Asa8G05009;Asa3G01593                                                                                                                                                           | 5.20E-03    | 0.042410778 |
| map00941#Flavonoid biosynthesis                                | 57,561            | 80                                          | 1,282                    | 8                                                       | Asa3G02582;Asa2G02799;Asa2G02798;Asa7G04348;Asa3G00985;Asa2G02806;Asa8G02502;Asa8G02509                                                                                                                                                                                                                                                              | 4.16E-04    | 7.11E-03    |
| map00945#Stilbenoid, diarylheptanoid and gingerol biosynthesis | 57,561            | 85                                          | 1,282                    | 10                                                      | Asa2G02799;Asa2G02798;Asa7G04099;Asa2G02910;Asa7G04348;Asa2G02918;Asa3G00985;Asa2G02806;Asa8G02502;Asa8G02509                                                                                                                                                                                                                                        | 2.00E-05    | 5.13E-04    |
| map00980#Metabolism of xenobiotics by cytochrome P450          | 57,561            | 145                                         | 1,282                    | 9                                                       | Asa7G00330;Asa0G04572;Asa7G07253;Asa7G06688;Asa7G06686;Asa2G05187;Asa1G04603;Asa8G04503;Asa7G00327                                                                                                                                                                                                                                                   | 0.005378928 | 0.042410778 |
| map03008#Ribosome biogenesis in eukaryotes                     | 57,561            | 155                                         | 1,282                    | 31                                                      | Asa2G03679;Asa0G05107;Asa4G05947;Asa3G01548;Asa6G02030;Asa8G03065;Asa5G00832;Asa4G05585;Asa4G03432;Asa3G02152;Asa4G06437;Asa5G04416;Asa6G02510;Asa7G01739;Asa7G06821;Asa0G03894;Asa2G06687;Asa2G06683;Asa6G02281;Asa6G02280;Asa7G01872;Asa8G05583;Asa2G03046;Asa6G02282;Asa6G04934;Asa6G04933;Asa1G00699;Asa6G04538;Asa5G01063;Asa5G01062;Asa4G00339 | 1.16538E-20 | 2.38902E-18 |
| map03013#RNA transport                                         | 57,561            | 282                                         | 1,282                    | 16                                                      | Asa1G04323;Asa3G02534;Asa3G01178;Asa2G05548;Asa2G05549;Asa3G03202;Asa7G06128;Asa7G05470;Asa7G05468;Asa2G05429;Asa2G06687;Asa2G06683;Asa0G00175;Asa1G04117;Asa5G01004;Asa0G03363                                                                                                                                                                      | 0.000670175 | 0.010568141 |

|                                   |        |     |       |                                             |                                                                                                                                     |             |             |
|-----------------------------------|--------|-----|-------|---------------------------------------------|-------------------------------------------------------------------------------------------------------------------------------------|-------------|-------------|
| map03030#DNA replication          | 57,561 | 197 | 1,282 | 21 7211                                     | Asa2G02074;Asa6G00580;Asa2G02116;Asa7G05821;Asa4G02825;Asa0G03472;Asa2G02077;Asa7G06918;Asa5G05999;Asa7G07017;Asa2G05234;Asa7G07211 | 4.14E-09    | 4.2465E-07  |
| map03410#Base excision repair     | 57,561 | 83  | 1,282 | 12 5G05999;Asa7G07017;Asa2G05234;Asa7G07211 | Asa2G02074;Asa6G00580;Asa2G02116;Asa7G05821;Asa4G02825;Asa0G03472;Asa2G02077;Asa7G06918;Asa5G05999;Asa7G07017;Asa2G05234;Asa7G07211 | 3.20E-07    | 2.1873E-05  |
| map04110#Cell cycle               | 57,561 | 235 | 1,282 | 19 03871;Asa4G01308;Asa4G01307              | Asa2G02074;Asa6G00580;Asa2G02116;Asa7G05821;Asa4G02825;Asa0G03472;Asa2G02077;Asa7G06918;Asa5G05999;Asa7G07017;Asa2G05234;Asa7G07211 | 1.68E-06    | 5.72331E-05 |
| map04210#Apoptosis                | 57,561 | 69  | 1,282 | 6 sa0G03472;Asa0G03363                      | Asa2G02074;Asa6G00580;Asa2G02116;Asa7G05821;Asa4G02825;Asa0G03472;Asa2G02077;Asa7G06918;Asa5G05999;Asa7G07017;Asa2G05234;Asa7G07211 | 4.39E-03    | 4.13E-02    |
| map04712#Circadian rhythm - plant | 57,561 | 60  | 1,282 | 7 sa0G03895;Asa7G00403;Asa2G02082           | Asa2G02074;Asa6G00580;Asa2G02116;Asa7G05821;Asa4G02825;Asa0G03472;Asa2G02077;Asa7G06918;Asa5G05999;Asa7G07017;Asa2G05234;Asa7G07211 | 0.000369296 | 0.006882329 |
