# Supplementary material for: Using Principal Component Analysis and RNA-Seq to Identify Candidate Genes That Control Salt Tolerance in Garlic (Allium sativum L.)
Source: MDPI journal article supplement (doi:10.3390/agronomy11040691), 2021-04-05
Supplement: s1 [file s1]

**Supplementary Table S1. Primers used in the study**

| Name      | Sequences            |
|-----------|----------------------|
| 7164F1270 | GCTGATGGGACTGAACAAGC |
| 7164R1388 | ATCTGCGAGAGCTCAGTGGT |
| 6244F39   | GAAGGAATCGTGGAAGACGA |
| 6244R90   | TACGCCAAGGCTCTGATAGG |
| 2557F598  | GGGACTGTTTTCTCGTGAA  |
| 2557R711  | TCCTTCCCTCTCAAAGCTCA |
| 2052F1786 | TGCGTTGTCAGGTACGGATA |
| 2052R1914 | CTCGGAAGTGTTGCAGCATA |
| EF1aF666  | GATCAATGAGCCCAAACGTC |
| EF1aR800  | GTAACGAGCATGCCAGGTTT |

| Genes                          | Accession No. |
|--------------------------------|---------------|
| potassium channel like         | Asa2G07164    |
| potassium channel like         | Asa2G07164    |
| potassium transporter          | Asa7G06244    |
| potassium transporter          | Asa7G06244    |
| Two-pore potassium channel     | Asa7G02557    |
| Two-pore potassium channel     | Asa7G02557    |
| potassium transporter          | Asa8G02052    |
| potassium transporter          | Asa8G02052    |
| elongation factor 1-alpha-like | Asa7G00373    |
| elongation factor 1-alpha-like | Asa7G00373    |
