# Supplementary material for: Using Principal Component Analysis and RNA-Seq to Identify Candidate Genes That Control Salt Tolerance in Garlic (Allium sativum L.)
Source: MDPI journal article supplement (doi:10.3390/agronomy11040691), 2021-04-05
Supplement: s1 [file s1]

## Supplementary Table S4. Go terms analysis of the DEGs from the salt-tolerant accession

Go terms analysis of the upregulated DEGs in leaves

| GO ID      | category           | description                    | ratio_in_subset | ratio_in_backgr<br>ound | pvalue      | adjusted_p  | genes                                                                                                                                                                                                                                                                                                                                                                                                                                                                                                                                                                                                                                                      |
|------------|--------------------|--------------------------------|-----------------|-------------------------|-------------|-------------|------------------------------------------------------------------------------------------------------------------------------------------------------------------------------------------------------------------------------------------------------------------------------------------------------------------------------------------------------------------------------------------------------------------------------------------------------------------------------------------------------------------------------------------------------------------------------------------------------------------------------------------------------------|
| GO:0006270 | Biological_Process | DNA replication initiation     | 8/1282          | 35/57561                | 8.17013E-07 | 0.000949848 | Asa3G02287, Asa3G04033, Asa4G01308, Asa6G05931, Asa7G06189, Asa8G02662, Asa8G05285, Asa8G05897                                                                                                                                                                                                                                                                                                                                                                                                                                                                                                                                                             |
| GO:0006259 | Biological_Process | DNA metabolic process          | 23/1282         | 294/57561               | 9.70223E-07 | 0.000949848 | Asa1G01701, Asa2G01603, Asa2G02628, Asa3G00161, Asa3G02287, Asa3G04033, Asa4G01308, Asa4G02781, Asa4G05591, Asa5G02951, Asa5G05999, Asa6G01461, Asa6G01736, Asa6G05930, Asa6G05931, Asa7G02551, Asa7G05821, Asa7G06189, Asa7G06671, Asa7G07211, Asa8G02662, Asa8G05285, Asa8G05897                                                                                                                                                                                                                                                                                                                                                                         |
| GO:0090304 | Biological_Process | nucleic acid metabolic process | 56/1282         | 1297/57561              | 6.05705E-06 | 0.003298377 | Asa1G03050, Asa2G01603, Asa2G02628, Asa2G03438, Asa2G03679, Asa2G05234, Asa2G06497, Asa3G00161, Asa3G00952, Asa3G01157, Asa3G02287, Asa3G04033, Asa4G01308, Asa4G02636, Asa4G02781, Asa4G04728, Asa4G05084, Asa4G05585, Asa4G05591, Asa4G05606, Asa4G06437, Asa5G00546, Asa5G02951, Asa5G04416, Asa5G04471, Asa5G04500, Asa5G05999, Asa6G00311, Asa6G01461, Asa6G01736, Asa6G04169, Asa6G04933, Asa6G04934, Asa6G05930, Asa6G05931, Asa7G00027, Asa7G01149, Asa7G02551, Asa7G05821, Asa7G06189, Asa7G06671, Asa7G06821, Asa7G07211, Asa8G00457, Asa8G00594, Asa8G01220, Asa8G01682, Asa8G02662, Asa8G03921, Asa8G04028, Asa8G04029, Asa8G05285, Asa8G05897 |

|            |                    |                                          |          |            |             |             |                                                                                                                                                                                                                                                                                                                                                                                                                                                                                                                                                                                                                                                                                                                                                                                                                                                                                                                                                                                                                                                                                                                                                                                                                                                                                                                                                                                                                                                                                                                                                                                                                                       |
|------------|--------------------|------------------------------------------|----------|------------|-------------|-------------|---------------------------------------------------------------------------------------------------------------------------------------------------------------------------------------------------------------------------------------------------------------------------------------------------------------------------------------------------------------------------------------------------------------------------------------------------------------------------------------------------------------------------------------------------------------------------------------------------------------------------------------------------------------------------------------------------------------------------------------------------------------------------------------------------------------------------------------------------------------------------------------------------------------------------------------------------------------------------------------------------------------------------------------------------------------------------------------------------------------------------------------------------------------------------------------------------------------------------------------------------------------------------------------------------------------------------------------------------------------------------------------------------------------------------------------------------------------------------------------------------------------------------------------------------------------------------------------------------------------------------------------|
| GO:0044260 | Biological_Process | cellular macromolecule metabolic process | 140/1282 | 4251/57561 | 6.73826E-06 | 0.003298377 | Asa0G01949, Asa0G02564, Asa0G03472, Asa0G04940, Asa0G05136, Asa0G05416, Asa1G00099, Asa1G00124, Asa1G00241, Asa1G01461, Asa1G01502, Asa1G02572, Asa2G00765, Asa2G01603, Asa2G02082, Asa2G02116, Asa2G02621, Asa2G02622, Asa2G02628, Asa2G02715, Asa2G02716, Asa2G02854, Asa2G02886, Asa2G03140, Asa2G03608, Asa2G03630, Asa2G03631, Asa2G04103, Asa2G05234, Asa2G05301, Asa2G05409, Asa2G06497, Asa2G07433, Asa3G00161, Asa3G01157, Asa3G02287, Asa3G02334, Asa3G02377, Asa3G02617, Asa3G03426, Asa3G03551, Asa3G03857, Asa3G04033, Asa3G04896, Asa4G00245, Asa4G00286, Asa4G00848, Asa4G01308, Asa4G01592, Asa4G02453, Asa4G02636, Asa4G02781, Asa4G02825, Asa4G02866, Asa4G03329, Asa4G03357, Asa4G03605, Asa4G03709, Asa4G04588, Asa4G04728, Asa4G04766, Asa4G05084, Asa4G05568, Asa4G05591, Asa4G05761, Asa5G00305, Asa5G00985, Asa5G00990, Asa5G01398, Asa5G02780, Asa5G02951, Asa5G03254, Asa5G03499, Asa5G03859, Asa5G03868, Asa5G03871, Asa5G04062, Asa5G05591, Asa5G05999, Asa6G00037, Asa6G00435, Asa6G00580, Asa6G00665, Asa6G00827, Asa6G01461, Asa6G01736, Asa6G01791, Asa6G02200, Asa6G02220, Asa6G03134, Asa6G04169, Asa6G04199, Asa6G04888, Asa6G04940, Asa6G05930, Asa6G05931, Asa6G06457, Asa6G06458, Asa7G00231, Asa7G00251, Asa7G00349, Asa7G00380, Asa7G00606, Asa7G01215, Asa7G01216, Asa7G01406, Asa7G01407, Asa7G01454, Asa7G02004, Asa7G02005, Asa7G02071, Asa7G02455, Asa7G02551, Asa7G02612, Asa0G04940, Asa5G02632, Asa6G00435, Asa6G06260, Asa7G04929, Asa8G00166, Asa1G0U2512, Asa2G0U1bU3, Asa2G0U2854, Asa2G05234, Asa5G03859, Asa5G03868, Asa5G03871, Asa6G00580, Asa6G04199, Asa7G02004, Asa7G02005 |
| GO:0016458 | Biological_Process | gene silencing                           | 6/1282   | 25/57561   | 1.48614E-05 | 0.005819708 |                                                                                                                                                                                                                                                                                                                                                                                                                                                                                                                                                                                                                                                                                                                                                                                                                                                                                                                                                                                                                                                                                                                                                                                                                                                                                                                                                                                                                                                                                                                                                                                                                                       |
| GO:0006260 | Biological_Process | DNA replication                          | 11/1282  | 102/57561  | 1.79794E-05 | 0.005867269 |                                                                                                                                                                                                                                                                                                                                                                                                                                                                                                                                                                                                                                                                                                                                                                                                                                                                                                                                                                                                                                                                                                                                                                                                                                                                                                                                                                                                                                                                                                                                                                                                                                       |

|            |                    |                                 |          |            |             |             |                                                                                                                                                                                                                                                                                                                                                                                                                                                                                                                                                                                                                                                                                                                                                                                                                                                                                                                                                                                                                                                                                                                                                                                                                                                                                                                                                                                                                         |
|------------|--------------------|---------------------------------|----------|------------|-------------|-------------|-------------------------------------------------------------------------------------------------------------------------------------------------------------------------------------------------------------------------------------------------------------------------------------------------------------------------------------------------------------------------------------------------------------------------------------------------------------------------------------------------------------------------------------------------------------------------------------------------------------------------------------------------------------------------------------------------------------------------------------------------------------------------------------------------------------------------------------------------------------------------------------------------------------------------------------------------------------------------------------------------------------------------------------------------------------------------------------------------------------------------------------------------------------------------------------------------------------------------------------------------------------------------------------------------------------------------------------------------------------------------------------------------------------------------|
| GO:0043170 | Biological_Process | macromolecule metabolic process | 176/1282 | 5788/57561 | 2.78118E-05 | 0.007779356 | Asa0G01949, Asa0G02564, Asa0G03472, Asa0G04940, Asa0G05107, Asa0G05136, Asa0G05416, Asa1G00099, Asa1G00124, Asa1G00241, Asa1G01461, Asa1G01502, Asa1G02572, Asa1G03050, Asa2G00765, Asa2G01603, Asa2G02082, Asa2G02116, Asa2G02621, Asa2G02622, Asa2G02628, Asa2G02715, Asa2G02716, Asa2G02835, Asa2G02854, Asa2G02886, Asa2G03140, Asa2G03438, Asa2G03608, Asa2G03630, Asa2G03631, Asa2G03679, Asa2G04103, Asa2G05234, Asa2G05301, Asa2G05409, Asa2G06497, Asa2G07433, Asa2G07527, Asa3G00161, Asa3G00952, Asa3G01157, Asa3G02287, Asa3G02334, Asa3G02377, Asa3G02617, Asa3G03312, Asa3G03426, Asa3G03551, Asa3G03857, Asa3G04033, Asa3G04896, Asa4G00245, Asa4G00286, Asa4G00848, Asa4G01308, Asa4G01592, Asa4G02453, Asa4G02636, Asa4G02781, Asa4G02825, Asa4G02866, Asa4G03005, Asa4G03329, Asa4G03357, Asa4G03605, Asa4G03709, Asa4G04588, Asa4G04728, Asa4G04766, Asa4G05084, Asa4G05568, Asa4G05585, Asa4G05591, Asa4G05606, Asa4G05761, Asa4G06437, Asa5G00305, Asa5G00546, Asa5G00985, Asa5G00990, Asa5G01398, Asa5G01449, Asa5G01452, Asa5G02780, Asa5G02951, Asa5G03254, Asa5G03499, Asa5G03859, Asa5G03868, Asa5G03871, Asa5G04062, Asa5G04416, Asa5G04471, Asa5G04500, Asa5G05591, Asa5G05999, Asa6G00037, Asa6G00311, Asa6G00435, Asa6G00580, Asa6G00665, Asa6G00827, Asa6G01461, Asa6G01736, Asa6G01791, Asa6G02200, Asa6G02220, Asa6G02632, Asa6G03134, Asa6G04169, Asa6G04199, Asa6G04888, Asa6G04933, |
|------------|--------------------|---------------------------------|----------|------------|-------------|-------------|-------------------------------------------------------------------------------------------------------------------------------------------------------------------------------------------------------------------------------------------------------------------------------------------------------------------------------------------------------------------------------------------------------------------------------------------------------------------------------------------------------------------------------------------------------------------------------------------------------------------------------------------------------------------------------------------------------------------------------------------------------------------------------------------------------------------------------------------------------------------------------------------------------------------------------------------------------------------------------------------------------------------------------------------------------------------------------------------------------------------------------------------------------------------------------------------------------------------------------------------------------------------------------------------------------------------------------------------------------------------------------------------------------------------------|

|            |                    |                                                     |         |            |             |             |                                                                                                                                                                                                                                                                                                                                                                                                                                                                                                                                                                                                                                                                                                                                                                                                                                                                                                                                                                      |
|------------|--------------------|-----------------------------------------------------|---------|------------|-------------|-------------|----------------------------------------------------------------------------------------------------------------------------------------------------------------------------------------------------------------------------------------------------------------------------------------------------------------------------------------------------------------------------------------------------------------------------------------------------------------------------------------------------------------------------------------------------------------------------------------------------------------------------------------------------------------------------------------------------------------------------------------------------------------------------------------------------------------------------------------------------------------------------------------------------------------------------------------------------------------------|
| GO:0006139 | Biological_Process | nucleobase-containing compound<br>metabolic process | 67/1282 | 1836/57561 | 0.000102084 | 0.020174578 | AsaUGU18U1, AsaUGU51U7, Asa1GUU241,<br>Asa1G01065, Asa1G01461, Asa1G03050,<br>Asa2G01603, Asa2G02628, Asa2G03438,<br>Asa2G03679, Asa2G04257, Asa2G05234,<br>Asa2G06497, Asa3G00161, Asa3G00952,<br>Asa3G01157, Asa3G02287, Asa3G02462,<br>Asa3G03580, Asa3G04033, Asa4G01308,<br>Asa4G02636, Asa4G02781, Asa4G03389,<br>Asa4G04728, Asa4G05084, Asa4G05585,<br>Asa4G05591, Asa4G05606, Asa4G06437,<br>Asa5G00546, Asa5G02091, Asa5G02951,<br>Asa5G04416, Asa5G04471, Asa5G04500,<br>Asa5G05999, Asa6G00311, Asa6G00580,<br>Asa6G01461, Asa6G01736, Asa6G04169,<br>Asa6G04933, Asa6G04934, Asa6G05930,<br>Asa6G05931, Asa7G00027, Asa7G01149,<br>Asa7G01317, Asa7G02551, Asa7G03315,<br>Asa7G05821, Asa7G06189, Asa7G06671,<br>Asa7G06821, Asa7G06919, Asa7G07211,<br>Asa8G00457, Asa8G00594, Asa8G01220,<br>Asa8G01682, Asa8G02662, Asa8G03921,<br>Asa8G04028, Asa8G04029, Asa8G05285,<br>AsaUGU513b, Asa1GUU124, Asa2GUU/6b,<br>Asa2G02715, Asa2G02716, Asa2G03630, |
| GO:0030243 | Biological_Process | cellulose metabolic process                         | 8/1282  | 66/57561   | 0.000108396 | 0.020174578 | Asa2G03631, Asa2G07433<br>AsaUGU513b, Asa1GUU124, Asa2GUU/6b,<br>Asa2G02715, Asa2G02716, Asa2G03630,                                                                                                                                                                                                                                                                                                                                                                                                                                                                                                                                                                                                                                                                                                                                                                                                                                                                 |
| GO:0030244 | Biological_Process | cellulose biosynthetic process                      | 8/1282  | 66/57561   | 0.000108396 | 0.020174578 | Asa2G03631, Asa2G07433<br>Asa3GUZ227, Asa3GU4bUb, Asa4GUU241,<br>Asa4G01265, Asa4G01399, Asa6G06243,<br>Asa7G00537, Asa7G06333, Asa8G02594,                                                                                                                                                                                                                                                                                                                                                                                                                                                                                                                                                                                                                                                                                                                                                                                                                          |
| GO:0006928 | Biological_Process | movement of cell or subcellular<br>component        | 10/1282 | 105/57561  | 0.000123644 | 0.020174578 | Asa8G05969<br>Asa3GUZ227, Asa3GU4bUb, Asa4GUU241,<br>Asa4G01265, Asa4G01399, Asa6G06243,<br>Asa7G00537, Asa7G06333, Asa8G02594,                                                                                                                                                                                                                                                                                                                                                                                                                                                                                                                                                                                                                                                                                                                                                                                                                                      |
| GO:0007018 | Biological_Process | microtubule-based movement                          | 10/1282 | 105/57561  | 0.000123644 | 0.020174578 | Asa8G05969<br>AsaUGU513b, Asa1GUU124, Asa2GUU/6b,<br>Asa2G02715, Asa2G02716, Asa2G03630,                                                                                                                                                                                                                                                                                                                                                                                                                                                                                                                                                                                                                                                                                                                                                                                                                                                                             |
| GO:0051273 | Biological_Process | beta-glucan metabolic process                       | 9/1282  | 94/57561   | 0.000256428 | 0.035863296 | Asa2G03631, Asa2G07433, Asa6G04940<br>AsaUGU513b, Asa1GUU124, Asa2GUU/6b,<br>Asa2G02715, Asa2G02716, Asa2G03630,                                                                                                                                                                                                                                                                                                                                                                                                                                                                                                                                                                                                                                                                                                                                                                                                                                                     |
| GO:0051274 | Biological_Process | beta-glucan biosynthetic process                    | 9/1282  | 94/57561   | 0.000256428 | 0.035863296 | Asa2G03631, Asa2G07433, Asa6G04940<br>Asa3G02287, Asa3G04033, Asa6G05931,                                                                                                                                                                                                                                                                                                                                                                                                                                                                                                                                                                                                                                                                                                                                                                                                                                                                                            |
| GO:0042555 | Cellular_Component | MCM complex<br>nuclear origin of replication        | 4/1282  | 8/57561    | 1.59605E-05 | 0.006368251 | Asa8G02662                                                                                                                                                                                                                                                                                                                                                                                                                                                                                                                                                                                                                                                                                                                                                                                                                                                                                                                                                           |
| GO:0005664 | Cellular_Component | recognition complex                                 | 3/1282  | 5/57561    | 0.000106585 | 0.009954805 | Asa5G03859, Asa5G03868, Asa5G03871                                                                                                                                                                                                                                                                                                                                                                                                                                                                                                                                                                                                                                                                                                                                                                                                                                                                                                                                   |

|            |                    |                              |         |           |             |             |                                                                                                                                                                                                                                                |
|------------|--------------------|------------------------------|---------|-----------|-------------|-------------|------------------------------------------------------------------------------------------------------------------------------------------------------------------------------------------------------------------------------------------------|
| GO:0000786 | Cellular_Component | nucleosome                   | 23/1282 | 440/57561 | 0.000219393 | 0.009954805 | Asa1G01828, Asa1G01851, Asa1G01904, Asa1G02073, Asa2G00293, Asa2G00294, Asa2G00295, Asa2G00751, Asa2G03560, Asa5G03893, Asa5G04158, Asa5G05718, Asa6G02716, Asa6G03653, Asa7G00783, Asa7G01788, Asa7G05313, Asa7G05539, Asa7G05685, Asa8G05254 |
| GO:0044815 | Cellular_Component | DNA packaging complex        | 23/1282 | 444/57561 | 0.000239097 | 0.009954805 | Asa1G01828, Asa1G01851, Asa1G01904, Asa1G02073, Asa2G00293, Asa2G00294, Asa2G00295, Asa2G00751, Asa2G03560, Asa5G03893, Asa5G04158, Asa5G05718, Asa6G02716, Asa6G03653, Asa7G00783, Asa7G01788, Asa7G05313, Asa7G05539, Asa7G05685, Asa8G05254 |
| GO:0032993 | Cellular_Component | protein-DNA complex          | 23/1282 | 444/57561 | 0.000239097 | 0.009954805 | Asa1G01828, Asa1G01851, Asa1G01904, Asa1G02073, Asa2G00293, Asa2G00294, Asa2G00295, Asa2G00751, Asa2G03560, Asa5G03893, Asa5G04158, Asa5G05718, Asa6G02716, Asa6G03653, Asa7G00783, Asa7G01788, Asa7G05313, Asa7G05539, Asa7G05685, Asa8G05254 |
| GO:0033646 | Cellular_Component | host intracellular part      | 15/1282 | 234/57561 | 0.000274443 | 0.009954805 | Asa1G004819, Asa2G04751, Asa2G04873, Asa2G07058, Asa3G01551, Asa4G02201, Asa4G03144, Asa4G03524, Asa5G00486, Asa6G01673, Asa7G03034, Asa7G03750, Asa7G03751                                                                                    |
| GO:0042025 | Cellular_Component | host cell nucleus            | 15/1282 | 234/57561 | 0.000274443 | 0.009954805 | Asa1G004819, Asa2G04751, Asa2G04873, Asa2G07058, Asa3G01551, Asa4G02201, Asa4G03144, Asa4G03524, Asa5G00486, Asa6G01673, Asa7G03034, Asa7G03750, Asa7G03751                                                                                    |
| GO:0018995 | Cellular_Component | host cellular component      | 15/1282 | 234/57561 | 0.000274443 | 0.009954805 | Asa1G004819, Asa2G04751, Asa2G04873, Asa2G07058, Asa3G01551, Asa4G02201, Asa4G03144, Asa4G03524, Asa5G00486, Asa6G01673, Asa7G03034, Asa7G03750, Asa7G03751                                                                                    |
| GO:0033647 | Cellular_Component | host intracellular organelle | 15/1282 | 234/57561 | 0.000274443 | 0.009954805 | Asa1G004819, Asa2G04751, Asa2G04873, Asa2G07058, Asa3G01551, Asa4G02201, Asa4G03144, Asa4G03524, Asa5G00486, Asa6G01673, Asa7G03034, Asa7G03750, Asa7G03751                                                                                    |

|            |                    |                                               |         |           |             |             |                                                                                                                                                                                                                                                                                                                                                                        |
|------------|--------------------|-----------------------------------------------|---------|-----------|-------------|-------------|------------------------------------------------------------------------------------------------------------------------------------------------------------------------------------------------------------------------------------------------------------------------------------------------------------------------------------------------------------------------|
| GO:0033648 | Cellular_Component | host intracellular membrane-bounded organelle | 15/1282 | 234/57561 | 0.000274443 | 0.009954805 | AsaUGU3140, Asa1GU1851, Asa1GU4819, Asa2G04751, Asa2G04873, Asa2G07058, Asa3G01551, Asa4G02201, Asa4G03144, Asa4G03524, Asa5G00486, Asa6G01673, Asa7G03034, Asa7G03750, Asa7G03751, AsaUGU3140, Asa1GU1851, Asa1GU4819, Asa2G04751, Asa2G04873, Asa2G07058, Asa3G01551, Asa4G02201, Asa4G03144, Asa4G03524, Asa5G00486, Asa6G01673, Asa7G03034, Asa7G03750, Asa7G03751 |
| GO:0033643 | Cellular_Component | host cell part                                | 15/1282 | 234/57561 | 0.000274443 | 0.009954805 | Asa1G04323, Asa3G01178, Asa3G02534, Asa7G05468, Asa7G05470                                                                                                                                                                                                                                                                                                             |
| GO:0005643 | Cellular_Component | nuclear pore                                  | 5/1282  | 29/57561  | 0.00041384  | 0.013760169 | AsaUGU3140, Asa1GU1851, Asa1GU4819, Asa2G00230, Asa2G07205, Asa3G01157, Asa3G01479, Asa4G01267, Asa4G02647, Asa4G03709, Asa4G04877, Asa4G04878, Asa5G00546, Asa5G03254, Asa5G05475, Asa6G00435, Asa6G00931, Asa6G01957, Asa6G01959, Asa6G05930, Asa6G05931, Asa7G02189, Asa7G06597, Asa8G03917                                                                         |
| GO:0005634 | Cellular_Component | nucleus                                       | 24/1282 | 488/57561 | 0.000503921 | 0.01513083  | Asa5G03859, Asa5G03868, Asa5G03871                                                                                                                                                                                                                                                                                                                                     |
| GO:000808  | Cellular_Component | origin recognition complex                    | 3/1282  | 9/57561   | 0.000837326 | 0.02220836  |                                                                                                                                                                                                                                                                                                                                                                        |

|            |                    |                     |         |            |             |             |                                                                                                                                                                                                                                                                                                                                                                                                                                                                                                                                                                                                                                                                                                                                                                                                                                                                                                                                                                                                                                                                                                                                                                                                                                                                                                            |
|------------|--------------------|---------------------|---------|------------|-------------|-------------|------------------------------------------------------------------------------------------------------------------------------------------------------------------------------------------------------------------------------------------------------------------------------------------------------------------------------------------------------------------------------------------------------------------------------------------------------------------------------------------------------------------------------------------------------------------------------------------------------------------------------------------------------------------------------------------------------------------------------------------------------------------------------------------------------------------------------------------------------------------------------------------------------------------------------------------------------------------------------------------------------------------------------------------------------------------------------------------------------------------------------------------------------------------------------------------------------------------------------------------------------------------------------------------------------------|
| GO:0003677 | Molecular_Function | DNA binding         | 98/1282 | 1877/57561 | 2.15708E-06 | 0.000604624 | Asa0G04737, Asa0G05405, Asa1G00799, Asa1G01232, Asa1G01461, Asa1G01828, Asa1G01851, Asa1G01904, Asa1G02047, Asa1G02073, Asa1G02572, Asa1G04397, Asa1G04399, Asa1G04590, Asa1G04599, Asa2G00230, Asa2G00293, Asa2G00294, Asa2G00295, Asa2G00751, Asa2G01057, Asa2G01372, Asa2G02074, Asa2G02077, Asa2G03560, Asa2G03691, Asa2G05220, Asa2G05234, Asa2G06653, Asa2G06801, Asa2G07205, Asa3G00161, Asa3G00548, Asa3G00549, Asa3G01666, Asa3G02287, Asa3G04033, Asa4G00762, Asa4G01308, Asa4G02636, Asa4G02647, Asa4G02781, Asa4G02825, Asa4G03456, Asa4G04846, Asa4G05697, Asa4G06053, Asa5G00486, Asa5G01500, Asa5G01546, Asa5G02951, Asa5G03859, Asa5G03868, Asa5G03871, Asa5G03893, Asa5G04158, Asa5G04479, Asa5G05718, Asa6G00580, Asa6G00931, Asa6G01159, Asa6G01181, Asa6G01356, Asa6G01673, Asa6G01736, Asa6G02716, Asa6G03653, Asa6G04169, Asa6G04199, Asa6G05930, Asa6G05931, Asa7G00027, Asa7G00783, Asa7G01788, Asa7G01855, Asa7G02189, Asa7G02551, Asa7G02720, Asa7G04304, Asa7G04928, Asa7G05313, Asa7G05539, Asa7G05685, Asa7G05821, Asa7G06671, Asa7G07017, Asa7G07211, Asa8G00594, Asa8G02112, Asa8G02536, Asa8G02662, Asa8G04505, Asa8G05254, Asa3G04415, Asa3G04606, Asa4G00241, Asa4G01265, Asa4G01399, Asa6G06243, Asa7G00506, Asa7G00537, Asa7G04044, Asa7G06333, Asa8G02594, Asa8G05969 |
| GO:0008017 | Molecular_Function | microtubule binding | 15/1282 | 155/57561  | 2.26335E-06 | 0.000604624 |                                                                                                                                                                                                                                                                                                                                                                                                                                                                                                                                                                                                                                                                                                                                                                                                                                                                                                                                                                                                                                                                                                                                                                                                                                                                                                            |

|            |                    |                 |          |            |             |             |                                                                                                                                                                                                                                                                                                                                                                                                                                                                                                                                                                                                                                                                                                                                                                                                                                                                                                                                                                                                                                                                                                                                                                                                                                                                                                                                                                                                                         |
|------------|--------------------|-----------------|----------|------------|-------------|-------------|-------------------------------------------------------------------------------------------------------------------------------------------------------------------------------------------------------------------------------------------------------------------------------------------------------------------------------------------------------------------------------------------------------------------------------------------------------------------------------------------------------------------------------------------------------------------------------------------------------------------------------------------------------------------------------------------------------------------------------------------------------------------------------------------------------------------------------------------------------------------------------------------------------------------------------------------------------------------------------------------------------------------------------------------------------------------------------------------------------------------------------------------------------------------------------------------------------------------------------------------------------------------------------------------------------------------------------------------------------------------------------------------------------------------------|
| GO:0005515 | Molecular_Function | protein binding | 144/1282 | 3156/57561 | 2.83818E-06 | 0.000604624 | Asa0G01805, Asa0G03107, Asa0G04541, Asa0G04572, Asa0G04737, Asa0G04870, Asa0G05923, Asa1G00274, Asa1G03033, Asa1G03049, Asa1G03050, Asa1G03132, Asa1G04603, Asa2G00765, Asa2G00916, Asa2G00964, Asa2G01005, Asa2G01372, Asa2G01636, Asa2G02082, Asa2G02715, Asa2G02918, Asa2G03278, Asa2G03313, Asa2G03364, Asa2G03438, Asa2G03604, Asa2G03608, Asa2G04517, Asa2G04817, Asa2G05187, Asa2G05496, Asa2G05778, Asa2G06181, Asa2G06209, Asa2G06440, Asa2G06443, Asa2G06497, Asa2G06677, Asa2G06744, Asa2G07084, Asa3G00933, Asa3G01595, Asa3G01596, Asa3G01966, Asa3G02227, Asa3G02574, Asa3G02781, Asa3G03202, Asa3G03558, Asa3G04040, Asa3G04408, Asa3G04414, Asa3G04415, Asa3G04442, Asa3G04606, Asa3G04896, Asa4G00241, Asa4G00339, Asa4G00978, Asa4G00985, Asa4G01265, Asa4G01399, Asa4G01402, Asa4G01592, Asa4G01715, Asa4G01917, Asa4G02314, Asa4G02647, Asa4G02995, Asa4G03432, Asa4G03456, Asa4G03524, Asa4G03709, Asa4G04341, Asa4G04780, Asa4G04971, Asa4G05441, Asa5G00832, Asa5G00850, Asa5G00985, Asa5G00990, Asa5G01062, Asa5G01063, Asa5G01266, Asa5G01398, Asa5G01565, Asa5G01566, Asa5G01628, Asa5G01817, Asa5G02542, Asa5G02787, Asa5G02816, Asa5G03254, Asa5G03479, Asa5G03499, Asa5G04062, Asa6G00909, Asa6G01603, Asa6G02531, Asa6G02532, Asa6G03134, Asa6G04538, Asa6G06010, Asa6G06065, Asa6G06192, Asa6G06243, Asa6G06497, Asa7G00330, Asa7G00403, Asa7G00506, Asa7G00537, Asa7G01243, Asa7G01406, |
|------------|--------------------|-----------------|----------|------------|-------------|-------------|-------------------------------------------------------------------------------------------------------------------------------------------------------------------------------------------------------------------------------------------------------------------------------------------------------------------------------------------------------------------------------------------------------------------------------------------------------------------------------------------------------------------------------------------------------------------------------------------------------------------------------------------------------------------------------------------------------------------------------------------------------------------------------------------------------------------------------------------------------------------------------------------------------------------------------------------------------------------------------------------------------------------------------------------------------------------------------------------------------------------------------------------------------------------------------------------------------------------------------------------------------------------------------------------------------------------------------------------------------------------------------------------------------------------------|



|            |                    |                      |          |            |             |             |                                                                                                                                                                                                                                                                                                                                                                                                                                                                                                                                                                                                                                                                                                                                                                                                                                                                                                                                                                                                                                                                                                                                                                                                                                                                                                                                                                                                                         |
|------------|--------------------|----------------------|----------|------------|-------------|-------------|-------------------------------------------------------------------------------------------------------------------------------------------------------------------------------------------------------------------------------------------------------------------------------------------------------------------------------------------------------------------------------------------------------------------------------------------------------------------------------------------------------------------------------------------------------------------------------------------------------------------------------------------------------------------------------------------------------------------------------------------------------------------------------------------------------------------------------------------------------------------------------------------------------------------------------------------------------------------------------------------------------------------------------------------------------------------------------------------------------------------------------------------------------------------------------------------------------------------------------------------------------------------------------------------------------------------------------------------------------------------------------------------------------------------------|
| GO:0003676 | Molecular_Function | nucleic acid binding | 163/1282 | 3545/57561 | 4.08039E-06 | 0.000604624 | Asa0G03146, Asa0G03318, Asa0G03321, Asa0G03363, Asa0G03896, Asa0G04230, Asa0G04737, Asa0G05107, Asa0G05405, Asa1G00085, Asa1G00799, Asa1G01232, Asa1G01461, Asa1G01828, Asa1G01851, Asa1G01904, Asa1G02047, Asa1G02073, Asa1G02572, Asa1G02789, Asa1G03687, Asa1G04397, Asa1G04399, Asa1G04570, Asa1G04590, Asa1G04599, Asa2G00230, Asa2G00293, Asa2G00294, Asa2G00295, Asa2G00751, Asa2G01057, Asa2G01372, Asa2G01603, Asa2G02074, Asa2G02077, Asa2G03123, Asa2G03140, Asa2G03371, Asa2G03438, Asa2G03560, Asa2G03691, Asa2G05078, Asa2G05220, Asa2G05234, Asa2G05798, Asa2G06174, Asa2G06440, Asa2G06653, Asa2G06801, Asa2G07205, Asa3G00155, Asa3G00161, Asa3G00548, Asa3G00549, Asa3G00952, Asa3G01666, Asa3G01975, Asa3G02134, Asa3G02249, Asa3G02287, Asa3G02574, Asa3G04033, Asa3G04442, Asa4G00762, Asa4G01308, Asa4G01865, Asa4G02122, Asa4G02636, Asa4G02647, Asa4G02781, Asa4G02825, Asa4G03329, Asa4G03456, Asa4G04015, Asa4G04588, Asa4G04846, Asa4G05084, Asa4G05585, Asa4G05606, Asa4G05697, Asa4G05916, Asa4G06053, Asa4G06129, Asa4G06437, Asa5G00486, Asa5G00546, Asa5G01004, Asa5G01500, Asa5G01546, Asa5G01862, Asa5G02468, Asa5G02884, Asa5G02951, Asa5G03804, Asa5G03859, Asa5G03868, Asa5G03871, Asa5G03893, Asa5G04158, Asa5G04416, Asa5G04479, Asa5G05210, Asa5G05396, Asa5G05718, Asa6G00311, Asa6G00382, Asa6G00580, Asa6G00931, Asa6G01159, Asa6G01181, Asa6G01356, Asa6G01673, Asa6G01736, |
|------------|--------------------|----------------------|----------|------------|-------------|-------------|-------------------------------------------------------------------------------------------------------------------------------------------------------------------------------------------------------------------------------------------------------------------------------------------------------------------------------------------------------------------------------------------------------------------------------------------------------------------------------------------------------------------------------------------------------------------------------------------------------------------------------------------------------------------------------------------------------------------------------------------------------------------------------------------------------------------------------------------------------------------------------------------------------------------------------------------------------------------------------------------------------------------------------------------------------------------------------------------------------------------------------------------------------------------------------------------------------------------------------------------------------------------------------------------------------------------------------------------------------------------------------------------------------------------------|

|            |                    |             |          |            |             |             |                                                                                                                                                                                                                                                                                                                                                                                                                                                                                                                                                                                                                                                                                                                                                                                                                                                                                                                                                                                                                                                                                                                                                                                                                                     |
|------------|--------------------|-------------|----------|------------|-------------|-------------|-------------------------------------------------------------------------------------------------------------------------------------------------------------------------------------------------------------------------------------------------------------------------------------------------------------------------------------------------------------------------------------------------------------------------------------------------------------------------------------------------------------------------------------------------------------------------------------------------------------------------------------------------------------------------------------------------------------------------------------------------------------------------------------------------------------------------------------------------------------------------------------------------------------------------------------------------------------------------------------------------------------------------------------------------------------------------------------------------------------------------------------------------------------------------------------------------------------------------------------|
| GO:0005524 | Molecular_Function | ATP binding | 104/1282 | 2858/57561 | 4.67265E-06 | 0.000604624 | Asa1G00085, Asa1G00099, Asa1G01502, Asa1G03337, Asa1G04570, Asa2G00765, Asa2G01603, Asa2G02621, Asa2G02622, Asa2G02715, Asa2G02716, Asa2G02886, Asa2G03313, Asa2G03364, Asa2G03608, Asa2G04103, Asa2G05409, Asa2G06714, Asa3G00161, Asa3G02050, Asa3G02227, Asa3G02287, Asa3G02574, Asa3G02955, Asa3G03551, Asa3G03857, Asa3G04033, Asa3G04606, Asa4G00241, Asa4G01265, Asa4G01308, Asa4G01399, Asa4G01592, Asa4G02122, Asa4G02413, Asa4G02781, Asa4G02866, Asa4G03885, Asa4G04971, Asa4G05584, Asa4G05761, Asa4G06129, Asa5G01398, Asa5G02091, Asa5G02780, Asa5G03499, Asa5G03804, Asa5G04062, Asa5G05210, Asa5G05475, Asa6G00241, Asa6G00665, Asa6G01736, Asa6G01791, Asa6G02200, Asa6G02220, Asa6G02280, Asa6G02281, Asa6G02282, Asa6G02510, Asa6G02632, Asa6G03850, Asa6G05384, Asa6G05931, Asa6G06172, Asa6G06243, Asa7G00231, Asa7G00251, Asa7G00380, Asa7G00537, Asa7G01406, Asa7G01454, Asa7G02005, Asa7G02071, Asa7G02455, Asa7G02551, Asa7G02793, Asa7G03940, Asa7G04963, Asa7G05497, Asa7G06333, Asa7G06642, Asa7G06671, Asa7G06956, Asa7G07273, Asa8G00277, Asa8G00409, Asa8G00457, Asa8G01220, Asa8G02594, Asa8G02662, Asa8G03592, Asa8G03922, Asa8G04206, Asa8G04852, Asa8G04901, Asa8G05285, Asa8G05472, Asa8G05897, |
|------------|--------------------|-------------|----------|------------|-------------|-------------|-------------------------------------------------------------------------------------------------------------------------------------------------------------------------------------------------------------------------------------------------------------------------------------------------------------------------------------------------------------------------------------------------------------------------------------------------------------------------------------------------------------------------------------------------------------------------------------------------------------------------------------------------------------------------------------------------------------------------------------------------------------------------------------------------------------------------------------------------------------------------------------------------------------------------------------------------------------------------------------------------------------------------------------------------------------------------------------------------------------------------------------------------------------------------------------------------------------------------------------|

|            |                    |                                 |          |            |             |             |                                                                                                                                                                                                                                                                                                                                                                                                                                                                                                                                                                                                                                                                                                                                                                                                                                                                                                                                                                                                                                                                                                                                                                                                                                                                                                                                                                                                                         |
|------------|--------------------|---------------------------------|----------|------------|-------------|-------------|-------------------------------------------------------------------------------------------------------------------------------------------------------------------------------------------------------------------------------------------------------------------------------------------------------------------------------------------------------------------------------------------------------------------------------------------------------------------------------------------------------------------------------------------------------------------------------------------------------------------------------------------------------------------------------------------------------------------------------------------------------------------------------------------------------------------------------------------------------------------------------------------------------------------------------------------------------------------------------------------------------------------------------------------------------------------------------------------------------------------------------------------------------------------------------------------------------------------------------------------------------------------------------------------------------------------------------------------------------------------------------------------------------------------------|
| GO:0097159 | Molecular_Function | organic cyclic compound binding | 288/1282 | 7920/57561 | 5.13201E-06 | 0.000604624 | Asa0G00239, Asa0G01949, Asa0G02421, Asa0G02564, Asa0G03146, Asa0G03318, Asa0G03321, Asa0G03345, Asa0G03363, Asa0G03535, Asa0G03896, Asa0G04230, Asa0G04737, Asa0G04963, Asa0G04964, Asa0G05107, Asa0G05405, Asa1G00085, Asa1G00099, Asa1G00253, Asa1G00799, Asa1G00958, Asa1G01232, Asa1G01373, Asa1G01461, Asa1G01502, Asa1G01828, Asa1G01851, Asa1G01904, Asa1G02047, Asa1G02073, Asa1G02092, Asa1G02572, Asa1G02789, Asa1G02945, Asa1G03337, Asa1G03687, Asa1G04397, Asa1G04399, Asa1G04570, Asa1G04590, Asa1G04599, Asa2G00017, Asa2G00230, Asa2G00293, Asa2G00294, Asa2G00295, Asa2G00751, Asa2G00765, Asa2G01057, Asa2G01244, Asa2G01372, Asa2G01603, Asa2G02074, Asa2G02077, Asa2G02621, Asa2G02622, Asa2G02715, Asa2G02716, Asa2G02798, Asa2G02799, Asa2G02806, Asa2G02886, Asa2G03046, Asa2G03123, Asa2G03140, Asa2G03313, Asa2G03364, Asa2G03371, Asa2G03438, Asa2G03560, Asa2G03608, Asa2G03691, Asa2G04103, Asa2G05078, Asa2G05220, Asa2G05234, Asa2G05337, Asa2G05409, Asa2G05798, Asa2G06174, Asa2G06440, Asa2G06653, Asa2G06683, Asa2G06687, Asa2G06714, Asa2G06801, Asa2G06982, Asa2G07067, Asa2G07205, Asa3G00155, Asa3G00161, Asa3G00548, Asa3G00549, Asa3G00952, Asa3G01593, Asa3G01666, Asa3G01975, Asa3G02050, Asa3G02134, Asa3G02227, Asa3G02249, Asa3G02258, Asa3G02287, Asa3G02574, Asa3G02955, Asa3G03551, Asa3G03857, Asa3G04033, Asa3G04155, Asa3G04442, Asa3G04606, Asa3G04675, Asa4G00241, |
|------------|--------------------|---------------------------------|----------|------------|-------------|-------------|-------------------------------------------------------------------------------------------------------------------------------------------------------------------------------------------------------------------------------------------------------------------------------------------------------------------------------------------------------------------------------------------------------------------------------------------------------------------------------------------------------------------------------------------------------------------------------------------------------------------------------------------------------------------------------------------------------------------------------------------------------------------------------------------------------------------------------------------------------------------------------------------------------------------------------------------------------------------------------------------------------------------------------------------------------------------------------------------------------------------------------------------------------------------------------------------------------------------------------------------------------------------------------------------------------------------------------------------------------------------------------------------------------------------------|

|            |                    |                               |          |            |             |             |                                                                                                                                                                                                                                                                                                                                                                                                                                                                                                                                                                                                                                                                                                                                                                                                                                                                                                                                                                                                                                                                                                                                                                                                                                                                                                                                                                                                                         |
|------------|--------------------|-------------------------------|----------|------------|-------------|-------------|-------------------------------------------------------------------------------------------------------------------------------------------------------------------------------------------------------------------------------------------------------------------------------------------------------------------------------------------------------------------------------------------------------------------------------------------------------------------------------------------------------------------------------------------------------------------------------------------------------------------------------------------------------------------------------------------------------------------------------------------------------------------------------------------------------------------------------------------------------------------------------------------------------------------------------------------------------------------------------------------------------------------------------------------------------------------------------------------------------------------------------------------------------------------------------------------------------------------------------------------------------------------------------------------------------------------------------------------------------------------------------------------------------------------------|
| GO:1901363 | Molecular_Function | heterocyclic compound binding | 288/1282 | 7920/57561 | 5.13201E-06 | 0.000604624 | Asa0G00239, Asa0G01949, Asa0G02421, Asa0G02564, Asa0G03146, Asa0G03318, Asa0G03321, Asa0G03345, Asa0G03363, Asa0G03535, Asa0G03896, Asa0G04230, Asa0G04737, Asa0G04963, Asa0G04964, Asa0G05107, Asa0G05405, Asa1G00085, Asa1G00099, Asa1G00253, Asa1G00799, Asa1G00958, Asa1G01232, Asa1G01373, Asa1G01461, Asa1G01502, Asa1G01828, Asa1G01851, Asa1G01904, Asa1G02047, Asa1G02073, Asa1G02092, Asa1G02572, Asa1G02789, Asa1G02945, Asa1G03337, Asa1G03687, Asa1G04397, Asa1G04399, Asa1G04570, Asa1G04590, Asa1G04599, Asa2G00017, Asa2G00230, Asa2G00293, Asa2G00294, Asa2G00295, Asa2G00751, Asa2G00765, Asa2G01057, Asa2G01244, Asa2G01372, Asa2G01603, Asa2G02074, Asa2G02077, Asa2G02621, Asa2G02622, Asa2G02715, Asa2G02716, Asa2G02798, Asa2G02799, Asa2G02806, Asa2G02886, Asa2G03046, Asa2G03123, Asa2G03140, Asa2G03313, Asa2G03364, Asa2G03371, Asa2G03438, Asa2G03560, Asa2G03608, Asa2G03691, Asa2G04103, Asa2G05078, Asa2G05220, Asa2G05234, Asa2G05337, Asa2G05409, Asa2G05798, Asa2G06174, Asa2G06440, Asa2G06653, Asa2G06683, Asa2G06687, Asa2G06714, Asa2G06801, Asa2G06982, Asa2G07067, Asa2G07205, Asa3G00155, Asa3G00161, Asa3G00548, Asa3G00549, Asa3G00952, Asa3G01593, Asa3G01666, Asa3G01975, Asa3G02050, Asa3G02134, Asa3G02227, Asa3G02249, Asa3G02258, Asa3G02287, Asa3G02574, Asa3G02955, Asa3G03551, Asa3G03857, Asa3G04033, Asa3G04155, Asa3G04442, Asa3G04606, Asa3G04675, Asa4G00241, |
|------------|--------------------|-------------------------------|----------|------------|-------------|-------------|-------------------------------------------------------------------------------------------------------------------------------------------------------------------------------------------------------------------------------------------------------------------------------------------------------------------------------------------------------------------------------------------------------------------------------------------------------------------------------------------------------------------------------------------------------------------------------------------------------------------------------------------------------------------------------------------------------------------------------------------------------------------------------------------------------------------------------------------------------------------------------------------------------------------------------------------------------------------------------------------------------------------------------------------------------------------------------------------------------------------------------------------------------------------------------------------------------------------------------------------------------------------------------------------------------------------------------------------------------------------------------------------------------------------------|

|            |                    |                               |          |            |             |             |                                                                                                                                                                                                                                                                                                                                                                                                                                                                                                                                                                                                                                                                                                                                                                                                                                                                                                                                                                                                                                                                                                                                                                                                                                                                         |
|------------|--------------------|-------------------------------|----------|------------|-------------|-------------|-------------------------------------------------------------------------------------------------------------------------------------------------------------------------------------------------------------------------------------------------------------------------------------------------------------------------------------------------------------------------------------------------------------------------------------------------------------------------------------------------------------------------------------------------------------------------------------------------------------------------------------------------------------------------------------------------------------------------------------------------------------------------------------------------------------------------------------------------------------------------------------------------------------------------------------------------------------------------------------------------------------------------------------------------------------------------------------------------------------------------------------------------------------------------------------------------------------------------------------------------------------------------|
| GO:0032559 | Molecular_Function | adenyl ribonucleotide binding | 106/1282 | 2961/57561 | 5.13319E-06 | 0.000604624 | Asa1G00085, Asa1G00099, Asa1G01502, Asa1G03337, Asa1G04570, Asa2G00017, Asa2G00765, Asa2G01603, Asa2G02621, Asa2G02622, Asa2G02715, Asa2G02716, Asa2G02886, Asa2G03313, Asa2G03364, Asa2G03608, Asa2G04103, Asa2G05409, Asa2G06714, Asa3G00161, Asa3G02050, Asa3G02227, Asa3G02287, Asa3G02574, Asa3G02955, Asa3G03551, Asa3G03857, Asa3G04033, Asa3G04606, Asa4G00241, Asa4G01265, Asa4G01308, Asa4G01399, Asa4G01592, Asa4G02122, Asa4G02413, Asa4G02781, Asa4G02866, Asa4G03885, Asa4G04971, Asa4G05584, Asa4G05761, Asa4G06129, Asa5G01398, Asa5G02091, Asa5G02780, Asa5G03499, Asa5G03804, Asa5G04062, Asa5G05210, Asa5G05475, Asa6G00241, Asa6G00665, Asa6G01736, Asa6G01791, Asa6G02200, Asa6G02220, Asa6G02280, Asa6G02281, Asa6G02282, Asa6G02510, Asa6G02632, Asa6G03850, Asa6G05384, Asa6G05931, Asa6G06172, Asa6G06243, Asa7G00231, Asa7G00251, Asa7G00380, Asa7G00537, Asa7G01406, Asa7G01454, Asa7G02005, Asa7G02071, Asa7G02455, Asa7G02551, Asa7G02793, Asa7G03940, Asa7G04963, Asa7G05497, Asa7G06333, Asa7G06642, Asa7G06671, Asa7G06956, Asa7G07273, Asa8G00277, Asa8G00409, Asa8G00457, Asa8G01220, Asa8G02594, Asa8G02662, Asa8G03592, Asa8G03922, Asa8G04188, Asa8G04206, Asa8G04852, Asa8G04901, Asa8G05285, Asa8G05472, Asa8G05897, Asa8G05969, |
|------------|--------------------|-------------------------------|----------|------------|-------------|-------------|-------------------------------------------------------------------------------------------------------------------------------------------------------------------------------------------------------------------------------------------------------------------------------------------------------------------------------------------------------------------------------------------------------------------------------------------------------------------------------------------------------------------------------------------------------------------------------------------------------------------------------------------------------------------------------------------------------------------------------------------------------------------------------------------------------------------------------------------------------------------------------------------------------------------------------------------------------------------------------------------------------------------------------------------------------------------------------------------------------------------------------------------------------------------------------------------------------------------------------------------------------------------------|

|            |                    |                           |          |            |             |             |                                                                                                                                                                                                                                                                                                                                                                                                                                                                                                                                                                                                                                                                                                                                                                                                                                                                                                                                                                                                                                                                                                                                                                                                                                                                         |
|------------|--------------------|---------------------------|----------|------------|-------------|-------------|-------------------------------------------------------------------------------------------------------------------------------------------------------------------------------------------------------------------------------------------------------------------------------------------------------------------------------------------------------------------------------------------------------------------------------------------------------------------------------------------------------------------------------------------------------------------------------------------------------------------------------------------------------------------------------------------------------------------------------------------------------------------------------------------------------------------------------------------------------------------------------------------------------------------------------------------------------------------------------------------------------------------------------------------------------------------------------------------------------------------------------------------------------------------------------------------------------------------------------------------------------------------------|
| GO:0030554 | Molecular_Function | adenyl nucleotide binding | 106/1282 | 2981/57561 | 5.27662E-06 | 0.000604624 | Asa1G00085, Asa1G00099, Asa1G01502, Asa1G03337, Asa1G04570, Asa2G00017, Asa2G00765, Asa2G01603, Asa2G02621, Asa2G02622, Asa2G02715, Asa2G02716, Asa2G02886, Asa2G03313, Asa2G03364, Asa2G03608, Asa2G04103, Asa2G05409, Asa2G06714, Asa3G00161, Asa3G02050, Asa3G02227, Asa3G02287, Asa3G02574, Asa3G02955, Asa3G03551, Asa3G03857, Asa3G04033, Asa3G04606, Asa4G00241, Asa4G01265, Asa4G01308, Asa4G01399, Asa4G01592, Asa4G02122, Asa4G02413, Asa4G02781, Asa4G02866, Asa4G03885, Asa4G04971, Asa4G05584, Asa4G05761, Asa4G06129, Asa5G01398, Asa5G02091, Asa5G02780, Asa5G03499, Asa5G03804, Asa5G04062, Asa5G05210, Asa5G05475, Asa6G00241, Asa6G00665, Asa6G01736, Asa6G01791, Asa6G02200, Asa6G02220, Asa6G02280, Asa6G02281, Asa6G02282, Asa6G02510, Asa6G02632, Asa6G03850, Asa6G05384, Asa6G05931, Asa6G06172, Asa6G06243, Asa7G00231, Asa7G00251, Asa7G00380, Asa7G00537, Asa7G01406, Asa7G01454, Asa7G02005, Asa7G02071, Asa7G02455, Asa7G02551, Asa7G02793, Asa7G03940, Asa7G04963, Asa7G05497, Asa7G06333, Asa7G06642, Asa7G06671, Asa7G06956, Asa7G07273, Asa8G00277, Asa8G00409, Asa8G00457, Asa8G01220, Asa8G02594, Asa8G02662, Asa8G03592, Asa8G03922, Asa8G04188, Asa8G04206, Asa8G04852, Asa8G04901, Asa8G05285, Asa8G05472, Asa8G05897, Asa8G05969, |
|------------|--------------------|---------------------------|----------|------------|-------------|-------------|-------------------------------------------------------------------------------------------------------------------------------------------------------------------------------------------------------------------------------------------------------------------------------------------------------------------------------------------------------------------------------------------------------------------------------------------------------------------------------------------------------------------------------------------------------------------------------------------------------------------------------------------------------------------------------------------------------------------------------------------------------------------------------------------------------------------------------------------------------------------------------------------------------------------------------------------------------------------------------------------------------------------------------------------------------------------------------------------------------------------------------------------------------------------------------------------------------------------------------------------------------------------------|

|            |                    |                        |          |            |             |             |                                                                                                                                                                                                                                                                                                                                                                                                                                                                                                                                                                                                                                                                                                                                                                                                                                                                                                                                                                                                                                                                                                                                                                                                                                                                                                                                                                                                                         |
|------------|--------------------|------------------------|----------|------------|-------------|-------------|-------------------------------------------------------------------------------------------------------------------------------------------------------------------------------------------------------------------------------------------------------------------------------------------------------------------------------------------------------------------------------------------------------------------------------------------------------------------------------------------------------------------------------------------------------------------------------------------------------------------------------------------------------------------------------------------------------------------------------------------------------------------------------------------------------------------------------------------------------------------------------------------------------------------------------------------------------------------------------------------------------------------------------------------------------------------------------------------------------------------------------------------------------------------------------------------------------------------------------------------------------------------------------------------------------------------------------------------------------------------------------------------------------------------------|
| GO:0036094 | Molecular_Function | small molecule binding | 133/1282 | 3942/57561 | 5.38401E-06 | 0.000604624 | Asa0G01949, Asa0G02421, Asa0G02564, Asa0G03345, Asa0G03535, Asa0G04963, Asa0G04964, Asa1G00085, Asa1G00099, Asa1G01373, Asa1G01502, Asa1G02092, Asa1G02572, Asa1G02945, Asa1G03337, Asa1G04570, Asa2G00017, Asa2G00765, Asa2G01244, Asa2G01603, Asa2G02621, Asa2G02622, Asa2G02715, Asa2G02716, Asa2G02832, Asa2G02886, Asa2G03046, Asa2G03313, Asa2G03364, Asa2G03608, Asa2G04103, Asa2G05234, Asa2G05409, Asa2G06683, Asa2G06687, Asa2G06714, Asa2G07067, Asa3G00161, Asa3G02050, Asa3G02227, Asa3G02287, Asa3G02574, Asa3G02955, Asa3G03551, Asa3G03857, Asa3G04033, Asa3G04155, Asa3G04606, Asa4G00241, Asa4G01265, Asa4G01308, Asa4G01399, Asa4G01592, Asa4G02122, Asa4G02413, Asa4G02781, Asa4G02866, Asa4G03885, Asa4G04196, Asa4G04605, Asa4G04971, Asa4G05584, Asa4G05761, Asa4G06129, Asa5G01398, Asa5G01517, Asa5G01772, Asa5G02091, Asa5G02780, Asa5G03499, Asa5G03804, Asa5G04062, Asa5G05210, Asa5G05475, Asa6G00241, Asa6G00665, Asa6G00972, Asa6G01736, Asa6G01791, Asa6G02200, Asa6G02220, Asa6G02280, Asa6G02281, Asa6G02282, Asa6G02510, Asa6G02632, Asa6G03520, Asa6G03850, Asa6G03911, Asa6G04017, Asa6G05384, Asa6G05931, Asa6G06172, Asa6G06243, Asa7G00231, Asa7G00251, Asa7G00380, Asa7G00537, Asa7G01406, Asa7G01454, Asa7G02005, Asa7G02071, Asa7G02455, Asa7G02551, Asa7G02793, Asa7G02799, Asa7G03940, Asa7G04963, Asa7G05497, Asa7G06333, Asa7G06642, Asa7G06671, Asa7G06956, Asa7G07105, |
|------------|--------------------|------------------------|----------|------------|-------------|-------------|-------------------------------------------------------------------------------------------------------------------------------------------------------------------------------------------------------------------------------------------------------------------------------------------------------------------------------------------------------------------------------------------------------------------------------------------------------------------------------------------------------------------------------------------------------------------------------------------------------------------------------------------------------------------------------------------------------------------------------------------------------------------------------------------------------------------------------------------------------------------------------------------------------------------------------------------------------------------------------------------------------------------------------------------------------------------------------------------------------------------------------------------------------------------------------------------------------------------------------------------------------------------------------------------------------------------------------------------------------------------------------------------------------------------------|

|            |                    |         |          |             |             |             |                                                                                                                                                                                                                                                                                                                                                                                                                                                                                                                                                                                                                                                                                                                                                                                                                                                                                                                                                                                                                                                                                                                                                                                                                                                                                                                                                                                                                                                                                                                                        |
|------------|--------------------|---------|----------|-------------|-------------|-------------|----------------------------------------------------------------------------------------------------------------------------------------------------------------------------------------------------------------------------------------------------------------------------------------------------------------------------------------------------------------------------------------------------------------------------------------------------------------------------------------------------------------------------------------------------------------------------------------------------------------------------------------------------------------------------------------------------------------------------------------------------------------------------------------------------------------------------------------------------------------------------------------------------------------------------------------------------------------------------------------------------------------------------------------------------------------------------------------------------------------------------------------------------------------------------------------------------------------------------------------------------------------------------------------------------------------------------------------------------------------------------------------------------------------------------------------------------------------------------------------------------------------------------------------|
| GO:0005488 | Molecular_Function | binding | 424/1282 | 12263/57561 | 6.02061E-06 | 0.000614649 | Asa0G00239, Asa0G01801, Asa0G01805,<br>Asa0G01949, Asa0G02421, Asa0G02564,<br>Asa0G02908, Asa0G03107, Asa0G03146,<br>Asa0G03318, Asa0G03321, Asa0G03345,<br>Asa0G03363, Asa0G03535, Asa0G03896,<br>Asa0G04230, Asa0G04541, Asa0G04572,<br>Asa0G04737, Asa0G04870, Asa0G04963,<br>Asa0G04964, Asa0G05107, Asa0G05405,<br>Asa0G05531, Asa0G05923, Asa1G00085,<br>Asa1G00099, Asa1G00253, Asa1G00274,<br>Asa1G00799, Asa1G00958, Asa1G01065,<br>Asa1G01232, Asa1G01373, Asa1G01461,<br>Asa1G01502, Asa1G01828, Asa1G01851,<br>Asa1G01904, Asa1G02047, Asa1G02073,<br>Asa1G02092, Asa1G02572, Asa1G02789,<br>Asa1G02945, Asa1G03033, Asa1G03049,<br>Asa1G03050, Asa1G03132, Asa1G03337,<br>Asa1G03687, Asa1G04397, Asa1G04399,<br>Asa1G04570, Asa1G04590, Asa1G04599,<br>Asa1G04603, Asa2G00017, Asa2G00230,<br>Asa2G00293, Asa2G00294, Asa2G00295,<br>Asa2G00751, Asa2G00765, Asa2G00916,<br>Asa2G00964, Asa2G01005, Asa2G01057,<br>Asa2G01244, Asa2G01372, Asa2G01603,<br>Asa2G01636, Asa2G02074, Asa2G02077,<br>Asa2G02082, Asa2G02621, Asa2G02622,<br>Asa2G02715, Asa2G02716, Asa2G02798,<br>Asa2G02799, Asa2G02806, Asa2G02832,<br>Asa2G02886, Asa2G02918, Asa2G03046,<br>Asa2G03123, Asa2G03140, Asa2G03269,<br>Asa2G03278, Asa2G03313, Asa2G03364,<br>Asa2G03371, Asa2G03438, Asa2G03560,<br>Asa2G03604, Asa2G03608, Asa2G03691,<br>Asa2G04103, Asa2G04517, Asa2G04805,<br>Asa2G04806, Asa2G04817, Asa2G05078,<br>Asa2G05187, Asa2G05220, Asa2G05234,<br>Asa2G05337, Asa2G05409, Asa2G05496,<br>Asa2G05778, Asa2G05798, Asa2G06174, |
|------------|--------------------|---------|----------|-------------|-------------|-------------|----------------------------------------------------------------------------------------------------------------------------------------------------------------------------------------------------------------------------------------------------------------------------------------------------------------------------------------------------------------------------------------------------------------------------------------------------------------------------------------------------------------------------------------------------------------------------------------------------------------------------------------------------------------------------------------------------------------------------------------------------------------------------------------------------------------------------------------------------------------------------------------------------------------------------------------------------------------------------------------------------------------------------------------------------------------------------------------------------------------------------------------------------------------------------------------------------------------------------------------------------------------------------------------------------------------------------------------------------------------------------------------------------------------------------------------------------------------------------------------------------------------------------------------|



|            |                    |                    |          |             |             |            |                                                                                                                                                                                                                                                                                                                                                                                                                                                                                                                                                                                                                                                                                                                                                                                                                                                                                                                                                                                                                                                                                                                                                                                                                                                                                                                                                                                                                         |
|------------|--------------------|--------------------|----------|-------------|-------------|------------|-------------------------------------------------------------------------------------------------------------------------------------------------------------------------------------------------------------------------------------------------------------------------------------------------------------------------------------------------------------------------------------------------------------------------------------------------------------------------------------------------------------------------------------------------------------------------------------------------------------------------------------------------------------------------------------------------------------------------------------------------------------------------------------------------------------------------------------------------------------------------------------------------------------------------------------------------------------------------------------------------------------------------------------------------------------------------------------------------------------------------------------------------------------------------------------------------------------------------------------------------------------------------------------------------------------------------------------------------------------------------------------------------------------------------|
| GO:0003674 | Molecular_Function | molecular_function | 625/1282 | 22741/57561 | 7.35058E-06 | 0.00061963 | Asa0G00239, Asa0G00527, Asa0G00595, Asa0G00994, Asa0G01197, Asa0G01649, Asa0G01801, Asa0G01805, Asa0G01949, Asa0G02421, Asa0G02564, Asa0G02908, Asa0G03072, Asa0G03107, Asa0G03146, Asa0G03209, Asa0G03318, Asa0G03321, Asa0G03345, Asa0G03363, Asa0G03472, Asa0G03481, Asa0G03535, Asa0G03862, Asa0G03896, Asa0G04230, Asa0G04495, Asa0G04496, Asa0G04541, Asa0G04572, Asa0G04667, Asa0G04737, Asa0G04870, Asa0G04940, Asa0G04963, Asa0G04964, Asa0G05107, Asa0G05136, Asa0G05405, Asa0G05412, Asa0G05416, Asa0G05531, Asa0G05923, Asa1G00085, Asa1G00099, Asa1G00124, Asa1G00249, Asa1G00253, Asa1G00274, Asa1G00799, Asa1G00958, Asa1G01065, Asa1G01232, Asa1G01373, Asa1G01461, Asa1G01502, Asa1G01828, Asa1G01851, Asa1G01904, Asa1G02047, Asa1G02073, Asa1G02092, Asa1G02393, Asa1G02572, Asa1G02738, Asa1G02789, Asa1G02945, Asa1G03033, Asa1G03049, Asa1G03050, Asa1G03132, Asa1G03337, Asa1G03687, Asa1G04136, Asa1G04137, Asa1G04138, Asa1G04196, Asa1G04264, Asa1G04323, Asa1G04339, Asa1G04397, Asa1G04399, Asa1G04570, Asa1G04590, Asa1G04599, Asa1G04603, Asa2G00017, Asa2G00230, Asa2G00293, Asa2G00294, Asa2G00295, Asa2G00751, Asa2G00765, Asa2G00916, Asa2G00964, Asa2G01005, Asa2G01057, Asa2G01106, Asa2G01244, Asa2G01372, Asa2G01603, Asa2G01636, Asa2G02074, Asa2G02077, Asa2G02082, Asa2G02116, Asa2G02621, Asa2G02622, Asa2G02715, Asa2G02716, Asa2G02798, Asa2G02799, Asa2G02806, Asa2G02832, |
|------------|--------------------|--------------------|----------|-------------|-------------|------------|-------------------------------------------------------------------------------------------------------------------------------------------------------------------------------------------------------------------------------------------------------------------------------------------------------------------------------------------------------------------------------------------------------------------------------------------------------------------------------------------------------------------------------------------------------------------------------------------------------------------------------------------------------------------------------------------------------------------------------------------------------------------------------------------------------------------------------------------------------------------------------------------------------------------------------------------------------------------------------------------------------------------------------------------------------------------------------------------------------------------------------------------------------------------------------------------------------------------------------------------------------------------------------------------------------------------------------------------------------------------------------------------------------------------------|

|            |                    |                                            |          |            |             |            |                                                                                                                                                                                                                                                                                                                                                                                                                                                                                                                                                                                                                                                                                                                                                                                                                                                                                                                                                                                                                                                                                                                                                                                                                                                                                                                                                            |
|------------|--------------------|--------------------------------------------|----------|------------|-------------|------------|------------------------------------------------------------------------------------------------------------------------------------------------------------------------------------------------------------------------------------------------------------------------------------------------------------------------------------------------------------------------------------------------------------------------------------------------------------------------------------------------------------------------------------------------------------------------------------------------------------------------------------------------------------------------------------------------------------------------------------------------------------------------------------------------------------------------------------------------------------------------------------------------------------------------------------------------------------------------------------------------------------------------------------------------------------------------------------------------------------------------------------------------------------------------------------------------------------------------------------------------------------------------------------------------------------------------------------------------------------|
| GO:0035639 | Molecular_Function | purine ribonucleoside triphosphate binding | 111/1282 | 3199/57561 | 8.08922E-06 | 0.00061963 | Asa0G01949, Asa0G02421, Asa0G02564, Asa1G00085, Asa1G00099, Asa1G01502, Asa1G03337, Asa1G04570, Asa2G00765, Asa2G01603, Asa2G02621, Asa2G02622, Asa2G02715, Asa2G02716, Asa2G02886, Asa2G03046, Asa2G03313, Asa2G03364, Asa2G03608, Asa2G04103, Asa2G05409, Asa2G06683, Asa2G06687, Asa2G06714, Asa3G00161, Asa3G02050, Asa3G02227, Asa3G02287, Asa3G02574, Asa3G02955, Asa3G03551, Asa3G03857, Asa3G04033, Asa3G04606, Asa4G00241, Asa4G01265, Asa4G01308, Asa4G01399, Asa4G01592, Asa4G02122, Asa4G02413, Asa4G02781, Asa4G02866, Asa4G03885, Asa4G04605, Asa4G04971, Asa4G05584, Asa4G05761, Asa4G06129, Asa5G01398, Asa5G02091, Asa5G02780, Asa5G03499, Asa5G03804, Asa5G04062, Asa5G05210, Asa5G05475, Asa6G00241, Asa6G00665, Asa6G01736, Asa6G01791, Asa6G02200, Asa6G02220, Asa6G02280, Asa6G02281, Asa6G02282, Asa6G02510, Asa6G02632, Asa6G03520, Asa6G03850, Asa6G03911, Asa6G05384, Asa6G05931, Asa6G06172, Asa6G06243, Asa7G00231, Asa7G00251, Asa7G00380, Asa7G00537, Asa7G01406, Asa7G01454, Asa7G02005, Asa7G02071, Asa7G02455, Asa7G02551, Asa7G02793, Asa7G03940, Asa7G04963, Asa7G05497, Asa7G06333, Asa7G06642, Asa7G06671, Asa7G06956, Asa7G07105, Asa7G07273, Asa8G00277, Asa8G00409, Asa8G00457, Asa8G01220, Asa8G02594, Asa8G02662, Asa8G03592, Asa8G03922, Asa8G04206, Asa8G04852, Asa0G03345, Asa0G04963, Asa0G04964, Asa7G02799 |
| GO:0019825 | Molecular_Function | oxygen binding                             | 4/1282   | 7/57561    | 8.12426E-06 | 0.00061963 |                                                                                                                                                                                                                                                                                                                                                                                                                                                                                                                                                                                                                                                                                                                                                                                                                                                                                                                                                                                                                                                                                                                                                                                                                                                                                                                                                            |

|            |                    |                               |          |            |             |            |                                                                                                                                                                                                                                                                                                                                                                                                                                                                                                                                                                                                                                                                                                                                                                                                                                                                                                                                                                                                                                                                                                                                                                                                                                                                                                                                                                                                                                                                                                                                    |
|------------|--------------------|-------------------------------|----------|------------|-------------|------------|------------------------------------------------------------------------------------------------------------------------------------------------------------------------------------------------------------------------------------------------------------------------------------------------------------------------------------------------------------------------------------------------------------------------------------------------------------------------------------------------------------------------------------------------------------------------------------------------------------------------------------------------------------------------------------------------------------------------------------------------------------------------------------------------------------------------------------------------------------------------------------------------------------------------------------------------------------------------------------------------------------------------------------------------------------------------------------------------------------------------------------------------------------------------------------------------------------------------------------------------------------------------------------------------------------------------------------------------------------------------------------------------------------------------------------------------------------------------------------------------------------------------------------|
| GO:0032555 | Molecular_Function | purine ribonucleotide binding | 113/1282 | 3302/57561 | 8.27776E-06 | 0.00061963 | Asa0G01949, Asa0G02421, Asa0G02564, Asa1G00085, Asa1G00099, Asa1G01502, Asa1G03337, Asa1G04570, Asa2G00017, Asa2G00765, Asa2G01603, Asa2G02621, Asa2G02622, Asa2G02715, Asa2G02716, Asa2G02886, Asa2G03046, Asa2G03313, Asa2G03364, Asa2G03608, Asa2G04103, Asa2G05409, Asa2G06683, Asa2G06687, Asa2G06714, Asa3G00161, Asa3G02050, Asa3G02227, Asa3G02287, Asa3G02574, Asa3G02955, Asa3G03551, Asa3G03857, Asa3G04033, Asa3G04606, Asa4G00241, Asa4G01265, Asa4G01308, Asa4G01399, Asa4G01592, Asa4G02122, Asa4G02413, Asa4G02781, Asa4G02866, Asa4G03885, Asa4G04605, Asa4G04971, Asa4G05584, Asa4G05761, Asa4G06129, Asa5G01398, Asa5G02091, Asa5G02780, Asa5G03499, Asa5G03804, Asa5G04062, Asa5G05210, Asa5G05475, Asa6G00241, Asa6G00665, Asa6G01736, Asa6G01791, Asa6G02200, Asa6G02220, Asa6G02280, Asa6G02281, Asa6G02282, Asa6G02510, Asa6G02632, Asa6G03520, Asa6G03850, Asa6G03911, Asa6G05384, Asa6G05931, Asa6G06172, Asa6G06243, Asa7G00231, Asa7G00251, Asa7G00380, Asa7G00537, Asa7G01406, Asa7G01454, Asa7G02005, Asa7G02071, Asa7G02455, Asa7G02551, Asa7G02793, Asa7G03940, Asa7G04963, Asa7G05497, Asa7G06333, Asa7G06642, Asa7G06671, Asa7G06956, Asa7G07105, Asa7G07273, Asa8G00277, Asa8G00409, Asa8G00457, Asa8G01220, Asa8G02594, Asa8G02662, Asa8G03592, Asa8G03922, Asa8G04188, Asa8G04206, Asa8G04852, Asa8G04901, Asa3G02221, Asa3G04408, Asa3G04414, Asa3G04415, Asa3G04606, Asa4G00241, Asa4G01265, Asa4G01399, Asa6G06243, Asa7G00506, Asa7G00537, Asa7G04044, Asa7G06333, Asa8G02594, Asa8G05969 |
| GO:0015631 | Molecular_Function | tubulin binding               | 15/1282  | 174/57561  | 9.37998E-06 | 0.00061963 |                                                                                                                                                                                                                                                                                                                                                                                                                                                                                                                                                                                                                                                                                                                                                                                                                                                                                                                                                                                                                                                                                                                                                                                                                                                                                                                                                                                                                                                                                                                                    |

|            |                    |                              |          |            |             |             |                                                                                                                                                                                                                                                                                                                                                                                                                                                                                                                                                                                                                                                                                                                                                                                                                                                                                                                                                                                                                                                                                                                                                                                                                                                                                                                                                                                                                         |
|------------|--------------------|------------------------------|----------|------------|-------------|-------------|-------------------------------------------------------------------------------------------------------------------------------------------------------------------------------------------------------------------------------------------------------------------------------------------------------------------------------------------------------------------------------------------------------------------------------------------------------------------------------------------------------------------------------------------------------------------------------------------------------------------------------------------------------------------------------------------------------------------------------------------------------------------------------------------------------------------------------------------------------------------------------------------------------------------------------------------------------------------------------------------------------------------------------------------------------------------------------------------------------------------------------------------------------------------------------------------------------------------------------------------------------------------------------------------------------------------------------------------------------------------------------------------------------------------------|
| GO:1901265 | Molecular_Function | nucleoside phosphate binding | 124/1282 | 3694/57561 | 1.07805E-05 | 0.000637184 | Asa0G01949, Asa0G02421, Asa0G02564, Asa0G03535, Asa1G00085, Asa1G00099, Asa1G01373, Asa1G01502, Asa1G02092, Asa1G02572, Asa1G02945, Asa1G03337, Asa1G04570, Asa2G00017, Asa2G00765, Asa2G01244, Asa2G01603, Asa2G02621, Asa2G02622, Asa2G02715, Asa2G02716, Asa2G02886, Asa2G03046, Asa2G03313, Asa2G03364, Asa2G03608, Asa2G04103, Asa2G05234, Asa2G05409, Asa2G06683, Asa2G06687, Asa2G06714, Asa2G07067, Asa3G00161, Asa3G02050, Asa3G02227, Asa3G02287, Asa3G02574, Asa3G02955, Asa3G03551, Asa3G03857, Asa3G04033, Asa3G04606, Asa4G00241, Asa4G01265, Asa4G01308, Asa4G01399, Asa4G01592, Asa4G02122, Asa4G02413, Asa4G02781, Asa4G02866, Asa4G03885, Asa4G04196, Asa4G04605, Asa4G04971, Asa4G05584, Asa4G05761, Asa4G06129, Asa5G01398, Asa5G01517, Asa5G01772, Asa5G02091, Asa5G02780, Asa5G03499, Asa5G03804, Asa5G04062, Asa5G05210, Asa5G05475, Asa6G00241, Asa6G00665, Asa6G01736, Asa6G01791, Asa6G02200, Asa6G02220, Asa6G02280, Asa6G02281, Asa6G02282, Asa6G02510, Asa6G02632, Asa6G03520, Asa6G03850, Asa6G03911, Asa6G05384, Asa6G05931, Asa6G06172, Asa6G06243, Asa7G00231, Asa7G00251, Asa7G00380, Asa7G00537, Asa7G01406, Asa7G01454, Asa7G02005, Asa7G02071, Asa7G02455, Asa7G02551, Asa7G02793, Asa7G03940, Asa7G04963, Asa7G05497, Asa7G06333, Asa7G06642, Asa7G06671, Asa7G06956, Asa7G07105, Asa7G07273, Asa8G00277, Asa8G00409, Asa8G00457, Asa8G01220, Asa8G02594, Asa8G02662, Asa8G03592, |
|------------|--------------------|------------------------------|----------|------------|-------------|-------------|-------------------------------------------------------------------------------------------------------------------------------------------------------------------------------------------------------------------------------------------------------------------------------------------------------------------------------------------------------------------------------------------------------------------------------------------------------------------------------------------------------------------------------------------------------------------------------------------------------------------------------------------------------------------------------------------------------------------------------------------------------------------------------------------------------------------------------------------------------------------------------------------------------------------------------------------------------------------------------------------------------------------------------------------------------------------------------------------------------------------------------------------------------------------------------------------------------------------------------------------------------------------------------------------------------------------------------------------------------------------------------------------------------------------------|

GO:0000166 Molecular\_Function nucleotide binding

124/1282

3694/57561

1.07805E-05

0.000637184

Asa0G01949, Asa0G02421, Asa0G02564,  
Asa0G03535, Asa1G00085, Asa1G00099,  
Asa1G01373, Asa1G01502, Asa1G02092,  
Asa1G02572, Asa1G02945, Asa1G03337,  
Asa1G04570, Asa2G00017, Asa2G00765,  
Asa2G01244, Asa2G01603, Asa2G02621,  
Asa2G02622, Asa2G02715, Asa2G02716,  
Asa2G02886, Asa2G03046, Asa2G03313,  
Asa2G03364, Asa2G03608, Asa2G04103,  
Asa2G05234, Asa2G05409, Asa2G06683,  
Asa2G06687, Asa2G06714, Asa2G07067,  
Asa3G00161, Asa3G02050, Asa3G02227,  
Asa3G02287, Asa3G02574, Asa3G02955,  
Asa3G03551, Asa3G03857, Asa3G04033,  
Asa3G04606, Asa4G00241, Asa4G01265,  
Asa4G01308, Asa4G01399, Asa4G01592,  
Asa4G02122, Asa4G02413, Asa4G02781,  
Asa4G02866, Asa4G03885, Asa4G04196,  
Asa4G04605, Asa4G04971, Asa4G05584,  
Asa4G05761, Asa4G06129, Asa5G01398,  
Asa5G01517, Asa5G01772, Asa5G02091,  
Asa5G02780, Asa5G03499, Asa5G03804,  
Asa5G04062, Asa5G05210, Asa5G05475,  
Asa6G00241, Asa6G00665, Asa6G01736,  
Asa6G01791, Asa6G02200, Asa6G02220,  
Asa6G02280, Asa6G02281, Asa6G02282,  
Asa6G02510, Asa6G02632, Asa6G03520,  
Asa6G03850, Asa6G03911, Asa6G05384,  
Asa6G05931, Asa6G06172, Asa6G06243,  
Asa7G00231, Asa7G00251, Asa7G00380,  
Asa7G00537, Asa7G01406, Asa7G01454,  
Asa7G02005, Asa7G02071, Asa7G02455,  
Asa7G02551, Asa7G02793, Asa7G03940,  
Asa7G04963, Asa7G05497, Asa7G06333,  
Asa7G06642, Asa7G06671, Asa7G06956,  
Asa7G07105, Asa7G07273, Asa8G00277,  
Asa8G00409, Asa8G00457, Asa8G01220,  
Asa8G02594, Asa8G02662, Asa8G03592,

|            |                    |                           |          |            |             |             |                                                                                                                                                                                                                                                                                                                                                                                                                                                                                                                                                                                                                                                                                                                                                                                                                                                                                                                                                                                                                                                                                                                                                                                                                                                                                                                                                 |
|------------|--------------------|---------------------------|----------|------------|-------------|-------------|-------------------------------------------------------------------------------------------------------------------------------------------------------------------------------------------------------------------------------------------------------------------------------------------------------------------------------------------------------------------------------------------------------------------------------------------------------------------------------------------------------------------------------------------------------------------------------------------------------------------------------------------------------------------------------------------------------------------------------------------------------------------------------------------------------------------------------------------------------------------------------------------------------------------------------------------------------------------------------------------------------------------------------------------------------------------------------------------------------------------------------------------------------------------------------------------------------------------------------------------------------------------------------------------------------------------------------------------------|
| GO:0017076 | Molecular_Function | purine nucleotide binding | 113/1282 | 3326/57561 | 1.18363E-05 | 0.000664607 | Asa0G01949, Asa0G02421, Asa0G02564, Asa1G00085, Asa1G00099, Asa1G01502, Asa1G03337, Asa1G04570, Asa2G00017, Asa2G00765, Asa2G01603, Asa2G02621, Asa2G02622, Asa2G02715, Asa2G02716, Asa2G02886, Asa2G03046, Asa2G03313, Asa2G03364, Asa2G03608, Asa2G04103, Asa2G05409, Asa2G06683, Asa2G06687, Asa2G06714, Asa3G00161, Asa3G02050, Asa3G02227, Asa3G02287, Asa3G02574, Asa3G02955, Asa3G03551, Asa3G03857, Asa3G04033, Asa3G04606, Asa4G00241, Asa4G01265, Asa4G01308, Asa4G01399, Asa4G01592, Asa4G02122, Asa4G02413, Asa4G02781, Asa4G02866, Asa4G03885, Asa4G04605, Asa4G04971, Asa4G05584, Asa4G05761, Asa4G06129, Asa5G01398, Asa5G02091, Asa5G02780, Asa5G03499, Asa5G03804, Asa5G04062, Asa5G05210, Asa5G05475, Asa6G00241, Asa6G00665, Asa6G01736, Asa6G01791, Asa6G02200, Asa6G02220, Asa6G02280, Asa6G02281, Asa6G02282, Asa6G02510, Asa6G02632, Asa6G03520, Asa6G03850, Asa6G03911, Asa6G05384, Asa6G05931, Asa6G06172, Asa6G06243, Asa7G00231, Asa7G00251, Asa7G00380, Asa7G00537, Asa7G01406, Asa7G01454, Asa7G02005, Asa7G02071, Asa7G02455, Asa7G02551, Asa7G02793, Asa7G03940, Asa7G04963, Asa7G05497, Asa7G06333, Asa7G06642, Asa7G06671, Asa7G06956, Asa7G07105, Asa7G07273, Asa8G00277, Asa8G00409, Asa8G00457, Asa8G01220, Asa8G02594, Asa8G02662, Asa8G03592, Asa8G03922, Asa8G04188, Asa8G04206, Asa8G04852, Asa8G04901, |
|------------|--------------------|---------------------------|----------|------------|-------------|-------------|-------------------------------------------------------------------------------------------------------------------------------------------------------------------------------------------------------------------------------------------------------------------------------------------------------------------------------------------------------------------------------------------------------------------------------------------------------------------------------------------------------------------------------------------------------------------------------------------------------------------------------------------------------------------------------------------------------------------------------------------------------------------------------------------------------------------------------------------------------------------------------------------------------------------------------------------------------------------------------------------------------------------------------------------------------------------------------------------------------------------------------------------------------------------------------------------------------------------------------------------------------------------------------------------------------------------------------------------------|

GO:0043168      Molecular\_Function      anion binding

126/1282

3828/57561

1.50956E-05

0.000807254

Asa0G01949, Asa0G02421, Asa0G02564,  
Asa0G03535, Asa1G00085, Asa1G00099,  
Asa1G01373, Asa1G01502, Asa1G02092,  
Asa1G02945, Asa1G03337, Asa1G04570,  
Asa2G00017, Asa2G00765, Asa2G01603,  
Asa2G02621, Asa2G02622, Asa2G02715,  
Asa2G02716, Asa2G02832, Asa2G02886,  
Asa2G03046, Asa2G03313, Asa2G03364,  
Asa2G03608, Asa2G04103, Asa2G05409,  
Asa2G06683, Asa2G06687, Asa2G06714,  
Asa2G07067, Asa3G00161, Asa3G02050,  
Asa3G02227, Asa3G02287, Asa3G02574,  
Asa3G02955, Asa3G03551, Asa3G03857,  
Asa3G04033, Asa3G04155, Asa3G04606,  
Asa4G00241, Asa4G01265, Asa4G01308,  
Asa4G01399, Asa4G01592, Asa4G02122,  
Asa4G02413, Asa4G02781, Asa4G02866,  
Asa4G03885, Asa4G04196, Asa4G04605,  
Asa4G04971, Asa4G05584, Asa4G05761,  
Asa4G06129, Asa5G01398, Asa5G01772,  
Asa5G02091, Asa5G02780, Asa5G03499,  
Asa5G03804, Asa5G04062, Asa5G05210,  
Asa5G05475, Asa6G00241, Asa6G00665,  
Asa6G00972, Asa6G01736, Asa6G01791,  
Asa6G02200, Asa6G02220, Asa6G02280,  
Asa6G02281, Asa6G02282, Asa6G02510,  
Asa6G02632, Asa6G03520, Asa6G03850,  
Asa6G03911, Asa6G04017, Asa6G05384,  
Asa6G05931, Asa6G06172, Asa6G06243,  
Asa7G00231, Asa7G00251, Asa7G00380,  
Asa7G00537, Asa7G01406, Asa7G01454,  
Asa7G02005, Asa7G02071, Asa7G02455,  
Asa7G02551, Asa7G02793, Asa7G03940,  
Asa7G04963, Asa7G05497, Asa7G05624,  
Asa7G06333, Asa7G06642, Asa7G06671,  
Asa7G06956, Asa7G07105, Asa7G07273,  
Asa8G00277, Asa8G00409, Asa8G00457,  
Asa8G01220, Asa8G02594, Asa8G02662,

|            |                    |                        |          |            |             |           |                                                                                                                                                                                                                                                                                                                                                                                                                                                                                                                                                                                                                                                                                                                                                                                                                                                                                                                                                                                                                                                                                                                                                                                                                                                                                                                                                 |
|------------|--------------------|------------------------|----------|------------|-------------|-----------|-------------------------------------------------------------------------------------------------------------------------------------------------------------------------------------------------------------------------------------------------------------------------------------------------------------------------------------------------------------------------------------------------------------------------------------------------------------------------------------------------------------------------------------------------------------------------------------------------------------------------------------------------------------------------------------------------------------------------------------------------------------------------------------------------------------------------------------------------------------------------------------------------------------------------------------------------------------------------------------------------------------------------------------------------------------------------------------------------------------------------------------------------------------------------------------------------------------------------------------------------------------------------------------------------------------------------------------------------|
| GO:0032553 | Molecular_Function | ribonucleotide binding | 113/1282 | 3349/57561 | 1.67713E-05 | 0.0008561 | Asa0G01949, Asa0G02421, Asa0G02564, Asa1G00085, Asa1G00099, Asa1G01502, Asa1G03337, Asa1G04570, Asa2G00017, Asa2G00765, Asa2G01603, Asa2G02621, Asa2G02622, Asa2G02715, Asa2G02716, Asa2G02886, Asa2G03046, Asa2G03313, Asa2G03364, Asa2G03608, Asa2G04103, Asa2G05409, Asa2G06683, Asa2G06687, Asa2G06714, Asa3G00161, Asa3G02050, Asa3G02227, Asa3G02287, Asa3G02574, Asa3G02955, Asa3G03551, Asa3G03857, Asa3G04033, Asa3G04606, Asa4G00241, Asa4G01265, Asa4G01308, Asa4G01399, Asa4G01592, Asa4G02122, Asa4G02413, Asa4G02781, Asa4G02866, Asa4G03885, Asa4G04605, Asa4G04971, Asa4G05584, Asa4G05761, Asa4G06129, Asa5G01398, Asa5G02091, Asa5G02780, Asa5G03499, Asa5G03804, Asa5G04062, Asa5G05210, Asa5G05475, Asa6G00241, Asa6G00665, Asa6G01736, Asa6G01791, Asa6G02200, Asa6G02220, Asa6G02280, Asa6G02281, Asa6G02282, Asa6G02510, Asa6G02632, Asa6G03520, Asa6G03850, Asa6G03911, Asa6G05384, Asa6G05931, Asa6G06172, Asa6G06243, Asa7G00231, Asa7G00251, Asa7G00380, Asa7G00537, Asa7G01406, Asa7G01454, Asa7G02005, Asa7G02071, Asa7G02455, Asa7G02551, Asa7G02793, Asa7G03940, Asa7G04963, Asa7G05497, Asa7G06333, Asa7G06642, Asa7G06671, Asa7G06956, Asa7G07105, Asa7G07273, Asa8G00277, Asa8G00409, Asa8G00457, Asa8G01220, Asa8G02594, Asa8G02662, Asa8G03592, Asa8G03922, Asa8G04188, Asa8G04206, Asa8G04852, Asa8G04901, |
|------------|--------------------|------------------------|----------|------------|-------------|-----------|-------------------------------------------------------------------------------------------------------------------------------------------------------------------------------------------------------------------------------------------------------------------------------------------------------------------------------------------------------------------------------------------------------------------------------------------------------------------------------------------------------------------------------------------------------------------------------------------------------------------------------------------------------------------------------------------------------------------------------------------------------------------------------------------------------------------------------------------------------------------------------------------------------------------------------------------------------------------------------------------------------------------------------------------------------------------------------------------------------------------------------------------------------------------------------------------------------------------------------------------------------------------------------------------------------------------------------------------------|





|            |                    |                                   |          |            |             |             |                                                                                                                                                                                                                                                                                                                                                                                                                                                                                                                                                                                                                                                                                                                                                                                                                                                                                                                                                                                                                                                                                                                                                                                                                                                                                                                                                                                                                                                                                                                                                                                                                                                                                                |
|------------|--------------------|-----------------------------------|----------|------------|-------------|-------------|------------------------------------------------------------------------------------------------------------------------------------------------------------------------------------------------------------------------------------------------------------------------------------------------------------------------------------------------------------------------------------------------------------------------------------------------------------------------------------------------------------------------------------------------------------------------------------------------------------------------------------------------------------------------------------------------------------------------------------------------------------------------------------------------------------------------------------------------------------------------------------------------------------------------------------------------------------------------------------------------------------------------------------------------------------------------------------------------------------------------------------------------------------------------------------------------------------------------------------------------------------------------------------------------------------------------------------------------------------------------------------------------------------------------------------------------------------------------------------------------------------------------------------------------------------------------------------------------------------------------------------------------------------------------------------------------|
|            |                    |                                   |          |            |             |             | Asa0G00239, Asa0G01801, Asa0G01949, Asa0G02421, Asa0G02564, Asa0G03535, Asa0G04870, Asa1G00085, Asa1G00099, Asa1G00253, Asa1G01065, Asa1G01373, Asa1G01502, Asa1G02092, Asa1G02945, Asa1G03337, Asa1G04570, Asa2G00017, Asa2G00765, Asa2G01603, Asa2G02621, Asa2G02622, Asa2G02715, Asa2G02716, Asa2G02798, Asa2G02799, Asa2G02806, Asa2G02832, Asa2G02886, Asa2G03046, Asa2G03269, Asa2G03313, Asa2G03364, Asa2G03608, Asa2G04103, Asa2G05234, Asa2G05337, Asa2G05409, Asa2G06683, Asa2G06687, Asa2G06714, Asa2G06982, Asa2G07067, Asa3G00161, Asa3G01666, Asa3G02050, Asa3G02227, Asa3G02258, Asa3G02287, Asa3G02574, Asa3G02933, Asa3G02955, Asa3G03157, Asa3G03166, Asa3G03551, Asa3G03857, Asa3G04033, Asa3G04155, Asa3G04606, Asa4G00241, Asa4G00552, Asa4G00735, Asa4G01261, Asa4G01265, Asa4G01308, Asa4G01399, Asa4G01436, Asa4G01592, Asa4G02122, Asa4G02413, Asa4G02781, Asa4G02825, Asa4G02866, Asa4G03389, Asa4G03524, Asa4G03709, Asa4G03885, Asa4G04196, Asa4G04605, Asa4G04971, Asa4G05584, Asa4G05761, Asa4G05916, Asa4G06129, Asa5G01398, Asa5G01546, Asa5G01565, Asa5G01566, Asa5G01648, Asa5G01772, Asa5G01862, Asa5G02091, Asa5G02289, Asa5G02780, Asa5G03254, Asa5G03499, Asa5G03804, Asa5G04062, Asa5G05210, Asa5G05475, Asa5G05595, Asa6G00241, Asa6G00665, Asa6G00972, Asa6G01736, Asa6G01791, Asa6G01889, Asa6G02200, Asa6G02220, Asa6G02280, Asa6G02281, Asa6G02282, Asa6G02510, Asa6G02632, Asa3G02221, Asa3G04606, Asa4G00241, Asa4G01265, Asa4G01399, Asa6G06243, Asa7G00537, Asa7G06333, Asa8G02594, Asa8G05969, Asa1G01461, Asa1G02512, Asa2G01603, Asa2G05234, Asa2G06281, Asa3G02287, Asa3G04033, Asa5G02951, Asa5G05999, Asa6G00580, Asa7G02551, Asa8G02662 |
| GO:0043167 | Molecular_Function | ion binding                       | 179/1282 | 6061/57561 | 0.000106876 | 0.004616224 |                                                                                                                                                                                                                                                                                                                                                                                                                                                                                                                                                                                                                                                                                                                                                                                                                                                                                                                                                                                                                                                                                                                                                                                                                                                                                                                                                                                                                                                                                                                                                                                                                                                                                                |
| GO:0003777 | Molecular_Function | microtubule motor activity        | 10/1282  | 105/57561  | 0.000123644 | 0.005142674 |                                                                                                                                                                                                                                                                                                                                                                                                                                                                                                                                                                                                                                                                                                                                                                                                                                                                                                                                                                                                                                                                                                                                                                                                                                                                                                                                                                                                                                                                                                                                                                                                                                                                                                |
| GO:0140097 | Molecular_Function | catalytic activity, acting on DNA | 12/1282  | 156/57561  | 0.000211075 | 0.008465625 |                                                                                                                                                                                                                                                                                                                                                                                                                                                                                                                                                                                                                                                                                                                                                                                                                                                                                                                                                                                                                                                                                                                                                                                                                                                                                                                                                                                                                                                                                                                                                                                                                                                                                                |

|            |                    |             |         |           |             |             |                                                                                                                                                                                                                                                                                                                                                            |
|------------|--------------------|-------------|---------|-----------|-------------|-------------|------------------------------------------------------------------------------------------------------------------------------------------------------------------------------------------------------------------------------------------------------------------------------------------------------------------------------------------------------------|
| GO:0003723 | Molecular_Function | RNA binding | 32/1282 | 726/57561 | 0.000316827 | 0.012144307 | Asa2G03140, Asa2G03438, Asa2G05078, Asa2G05798, Asa3G00155, Asa3G00952, Asa3G02134, Asa3G02249, Asa3G04442, Asa4G03329, Asa4G04588, Asa4G05084, Asa4G05585, Asa4G05606, Asa4G06437, Asa5G01004, Asa5G04416, Asa6G00311, Asa7G00027, Asa7G00744, Asa7G04063, Asa7G05876, Asa7G06325, Asa7G06821, Asa8G03193, Asa8G03310, Asa8G04591, Asa8G05316, Asa8G05327 |
|------------|--------------------|-------------|---------|-----------|-------------|-------------|------------------------------------------------------------------------------------------------------------------------------------------------------------------------------------------------------------------------------------------------------------------------------------------------------------------------------------------------------------|

|            |                    |                                                                                                                                         |          |            |             |             |                                                                                                                                                                                                                                                                                                                                                                                                                                                                                                                                                                                                                                                                                                                                                                                                                                                                                                                                                                                                                                                                                                                                                                                                                                                                                                                                                                                                                         |
|------------|--------------------|-----------------------------------------------------------------------------------------------------------------------------------------|----------|------------|-------------|-------------|-------------------------------------------------------------------------------------------------------------------------------------------------------------------------------------------------------------------------------------------------------------------------------------------------------------------------------------------------------------------------------------------------------------------------------------------------------------------------------------------------------------------------------------------------------------------------------------------------------------------------------------------------------------------------------------------------------------------------------------------------------------------------------------------------------------------------------------------------------------------------------------------------------------------------------------------------------------------------------------------------------------------------------------------------------------------------------------------------------------------------------------------------------------------------------------------------------------------------------------------------------------------------------------------------------------------------------------------------------------------------------------------------------------------------|
|            |                    |                                                                                                                                         |          |            |             |             | Asa0G00595, Asa0G01949, Asa0G02564, Asa0G02908, Asa0G03072, Asa0G03472, Asa0G03862, Asa0G04940, Asa0G05107, Asa0G05136, Asa1G00099, Asa1G00124, Asa1G01502, Asa1G02572, Asa2G00765, Asa2G02082, Asa2G02116, Asa2G02621, Asa2G02622, Asa2G02715, Asa2G02716, Asa2G02886, Asa2G02910, Asa2G02918, Asa2G03065, Asa2G03608, Asa2G03630, Asa2G03631, Asa2G04103, Asa2G04257, Asa2G04805, Asa2G04806, Asa2G05234, Asa2G05301, Asa2G05409, Asa2G06281, Asa2G06455, Asa2G06961, Asa2G07433, Asa3G00952, Asa3G00985, Asa3G01193, Asa3G02050, Asa3G02152, Asa3G02462, Asa3G02781, Asa3G03426, Asa3G03551, Asa3G03857, Asa3G04601, Asa3G04896, Asa4G00245, Asa4G00286, Asa4G00495, Asa4G00963, Asa4G01592, Asa4G02636, Asa4G02825, Asa4G02866, Asa4G02983, Asa4G03232, Asa4G03357, Asa4G03389, Asa4G03524, Asa4G03709, Asa4G04766, Asa4G05084, Asa4G05761, Asa4G05947, Asa5G00025, Asa5G00305, Asa5G00698, Asa5G00985, Asa5G00990, Asa5G01398, Asa5G02091, Asa5G02780, Asa5G02793, Asa5G03254, Asa5G03499, Asa5G03751, Asa5G03879, Asa5G03885, Asa5G04062, Asa6G00037, Asa6G00060, Asa6G00435, Asa6G00580, Asa6G00665, Asa6G00827, Asa6G01791, Asa6G02200, Asa6G02220, Asa6G03134, Asa6G04169, Asa6G04940, Asa7G00231, Asa7G00251, Asa7G00380, Asa7G00493, Asa7G00925, Asa7G01215, Asa7G01216, Asa7G01406, Asa7G01407, Asa7G01454, Asa7G02071, Asa7G02455, Asa7G02793, Asa7G04099, Asa7G04348, Asa7G04963, Asa7G06597, Asa7G06821, |
| GO:0016740 | Molecular_Function | transferase activity<br>oxidoreductase activity, acting on<br>single donors with incorporation of<br>molecular oxygen, incorporation of | 128/1282 | 4195/57561 | 0.000324425 | 0.012144307 | Asa0G04667, Asa0G04870, Asa3G00251, Asa3G03563, Asa5G01565, Asa5G01566,                                                                                                                                                                                                                                                                                                                                                                                                                                                                                                                                                                                                                                                                                                                                                                                                                                                                                                                                                                                                                                                                                                                                                                                                                                                                                                                                                 |
| GO:0016702 | Molecular_Function | two atoms of oxygen                                                                                                                     | 8/1282   | 78/57561   | 0.000350022 | 0.012283599 | Asa5G03630, Asa5G03631<br>AsaUG04667, AsaUG04870, Asa3G00251,<br>Asa3G03563, Asa5G01565, Asa5G01566,                                                                                                                                                                                                                                                                                                                                                                                                                                                                                                                                                                                                                                                                                                                                                                                                                                                                                                                                                                                                                                                                                                                                                                                                                                                                                                                    |
| GO:0051213 | Molecular_Function | dioxygenase activity                                                                                                                    | 8/1282   | 78/57561   | 0.000350022 | 0.012283599 | Asa5G03630, Asa5G03631                                                                                                                                                                                                                                                                                                                                                                                                                                                                                                                                                                                                                                                                                                                                                                                                                                                                                                                                                                                                                                                                                                                                                                                                                                                                                                                                                                                                  |

|            |                    |                                                      |         |           |             |             |                                                                                                                                                                                                                                                                                                                                                                                                                                                                                                                                    |
|------------|--------------------|------------------------------------------------------|---------|-----------|-------------|-------------|------------------------------------------------------------------------------------------------------------------------------------------------------------------------------------------------------------------------------------------------------------------------------------------------------------------------------------------------------------------------------------------------------------------------------------------------------------------------------------------------------------------------------------|
| GO:0046983 | Molecular_Function | protein dimerization activity                        | 21/1282 | 404/57561 | 0.00045489  | 0.015480031 | Asa0001803, Asa0004737, Asa2001372, Asa2G02918, Asa2G04517, Asa2G04817, Asa2G06443, Asa4G00978, Asa4G00985, Asa4G01917, Asa4G02647, Asa4G03456, Asa4G04780, Asa4G05441, Asa5G01628, Asa7G00403, Asa7G03462, Asa7G04099, Asa7G04304, Asa7G04807, Asa7G04808, Asa0000000, Asa0000000, Asa0000000, Asa2G02910, Asa2G02918, Asa2G04805, Asa2G04806, Asa3G00952, Asa4G03709, Asa4G04766, Asa5G03254, Asa5G03879, Asa5G03885, Asa7G00493, Asa7G04099, Asa7G04348, Asa7G06597, Asa7G06821, Asa8G02259, Asa8G02752, Asa8G03921, Asa8G05583 |
| GO:0008168 | Molecular_Function | methyltransferase activity                           | 22/1282 | 447/57561 | 0.000571898 | 0.018734664 | Asa1G04323, Asa3G01178, Asa7G05468,                                                                                                                                                                                                                                                                                                                                                                                                                                                                                                |
| GO:0017056 | Molecular_Function | structural constituent of nuclear pore               | 4/1282  | 18/57561  | 0.000583894 | 0.018734664 | Asa7G05470, Asa0000140, Asa1G02047, Asa1G04337, Asa1G04399, Asa2G06653, Asa3G01666, Asa4G00762, Asa4G05697, Asa5G00486, Asa5G01546, Asa6G01159, Asa6G01356, Asa6G01673, Asa7G00027                                                                                                                                                                                                                                                                                                                                                 |
| GO:0043565 | Molecular_Function | sequence-specific DNA binding                        | 14/1282 | 230/57561 | 0.00072107  | 0.02249338  | Asa3G02227, Asa3G0400b, Asa4G00241, Asa4G01265, Asa4G01399, Asa6G06243, Asa7G00537, Asa7G06333, Asa8G02594, Asa8G05969                                                                                                                                                                                                                                                                                                                                                                                                             |
| GO:0003774 | Molecular_Function | motor activity                                       | 10/1282 | 136/57561 | 0.000983766 | 0.029858616 | Asa3G00952, Asa4G03709, Asa5G03254,                                                                                                                                                                                                                                                                                                                                                                                                                                                                                                |
| GO:0008170 | Molecular_Function | N-methyltransferase activity                         | 6/1282  | 52/57561  | 0.001024755 | 0.03028422  | Asa7G06597, Asa8G02752, Asa8G03921, Asa7G01149, Asa8G01220, Asa8G04028,                                                                                                                                                                                                                                                                                                                                                                                                                                                            |
| GO:0004525 | Molecular_Function | ribonuclease III activity                            | 4/1282  | 22/57561  | 0.001300356 | 0.036507496 | Asa8G04029                                                                                                                                                                                                                                                                                                                                                                                                                                                                                                                         |
| GO:0032296 | Molecular_Function | double-stranded RNA-specific ribonuclease activity   | 4/1282  | 22/57561  | 0.001300356 | 0.036507496 | Asa7G01149, Asa8G01220, Asa8G04028, Asa8G04029, Asa0000000, Asa0000000, Asa0000000, Asa2G02910, Asa2G02918, Asa2G04805, Asa2G04806, Asa3G00952, Asa4G03709, Asa4G04766, Asa5G03254, Asa5G03879, Asa5G03885, Asa7G00493, Asa7G04099, Asa7G04348, Asa7G06597, Asa7G06821, Asa8G02259, Asa8G02752, Asa8G03921,                                                                                                                                                                                                                        |
| GO:0016741 | Molecular_Function | transferase activity, transferring one-carbon groups | 22/1282 | 481/57561 | 0.001594394 | 0.043354502 | Asa8G05583                                                                                                                                                                                                                                                                                                                                                                                                                                                                                                                         |
