# Supplementary material for: Using Principal Component Analysis and RNA-Seq to Identify Candidate Genes That Control Salt Tolerance in Garlic (Allium sativum L.)
Source: MDPI journal article supplement (doi:10.3390/agronomy11040691), 2021-04-05
Supplement: s1 [file s1]

### Supplementary Table S3. DEGs identified in the salt-tolerant accession

Upregulated genes in the salt-tolerant leaves

| Gene ID    | Annotation                                                                             | RLCK_rep1 | RLCK_rep2 | RLCK_rep3 | mean   | RLN_rep1 | RLN_rep2 | RLN_rep3 | mean    | ratio  | adjusted p |
|------------|----------------------------------------------------------------------------------------|-----------|-----------|-----------|--------|----------|----------|----------|---------|--------|------------|
| Asa8G00068 | alcohol dehydrogenase                                                                  | 25.1      | 24.46     | 26.28     | 25.28  | 220.64   | 218.13   | 231.47   | 223.41  | 8.84   | 4.30E-33   |
| Asa1G03716 | Usp domain-containing protein                                                          | 13.72     | 17.02     | 21.3      | 17.35  | 178.39   | 141.95   | 145.58   | 155.31  | 8.95   | 7.68E-32   |
| Asa7G03863 | FAS1 domain-containing protein                                                         | 1.17      | 1.43      | 1.57      | 1.39   | 11.15    | 9.3      | 7.91     | 9.45    | 6.8    | 1.98E-18   |
| Asa7G00387 | MYB transcription factor                                                               | 2.25      | 2.33      | 2.49      | 2.36   | 20.73    | 16.47    | 21.17    | 19.46   | 8.26   | 1.65E-17   |
| Asa7G05866 | LRRNT_2 domain-containing protein                                                      | 3.78      | 7.39      | 7.93      | 6.37   | 65.55    | 59.82    | 78.78    | 68.05   | 10.69  | 4.91E-16   |
| Asa7G05863 | LRRNT_2 domain-containing protein                                                      | 9.9       | 18.55     | 16.45     | 14.97  | 156.14   | 142.71   | 190.42   | 163.09  | 10.9   | 3.53E-15   |
| Asa4G03524 | BTB domain-containing protein                                                          | 3.78      | 3.72      | 4.84      | 4.11   | 17.1     | 23.65    | 20.13    | 20.29   | 4.93   | 3.58E-15   |
| Asa7G05862 | LRRNT_2 domain-containing protein                                                      | 9.82      | 18.55     | 16.4      | 14.92  | 156.05   | 142.61   | 190.42   | 163.03  | 10.92  | 3.91E-15   |
| Asa5G03885 | Tocopherol methyltransferase                                                           | 0.8       | 0.46      | 0.58      | 0.61   | 5.38     | 8.6      | 7.74     | 7.24    | 11.8   | 9.54E-15   |
| Asa5G04068 | 1-aminocyclopropane-1-carboxylate oxidase 2                                            | 10.68     | 20.17     | 21.76     | 17.54  | 82.75    | 78.39    | 71.61    | 77.58   | 4.42   | 9.98E-14   |
| Asa6G01181 | TF-B3 domain-containing protein                                                        | 2.49      | 2.39      | 4.57      | 3.15   | 16.86    | 19.84    | 18.48    | 18.39   | 5.84   | 1.35E-13   |
| Asa7G03077 | Superoxide dismutase                                                                   | 3.91      | 3.84      | 4.73      | 4.16   | 18.05    | 21.82    | 23.55    | 21.14   | 5.08   | 1.60E-13   |
| Asa3G02258 | Cytochrome P450                                                                        | 0         | 0.02      | 0.1       | 0.04   | 5.96     | 14.42    | 10.72    | 10.37   | 259.17 | 3.27E-13   |
| Asa5G02304 | Early nodulin-93                                                                       | 0.71      | 0.16      | 0.22      | 0.36   | 14.97    | 15.62    | 23       | 17.86   | 49.17  | 3.36E-13   |
| Asa8G04181 | Alcohol dehydrogenase                                                                  | 6.14      | 7.27      | 7.56      | 6.99   | 28.64    | 32.71    | 37.08    | 32.81   | 4.69   | 2.70E-12   |
| Asa5G03903 | Heavy metal-associated isoprenylated plant protein                                     | 2.4       | 1.78      | 2.21      | 2.13   | 15.09    | 12.6     | 9.49     | 12.39   | 5.82   | 8.93E-12   |
| Asa0G00437 | Glutathione S-transferase                                                              | 422.2     | 382.93    | 458.23    | 421.12 | 1493.22  | 1601.98  | 1339.27  | 1478.16 | 3.51   | 1.24E-11   |
| Asa2G06440 | Putative argonaute family protein                                                      | 3.31      | 3.73      | 3.62      | 3.55   | 12.88    | 16.72    | 17.26    | 15.62   | 4.4    | 1.50E-11   |
| Asa6G06192 | NAB domain-containing protein                                                          | 3.52      | 3.14      | 3.7       | 3.45   | 11.07    | 15.85    | 11.01    | 12.64   | 3.66   | 1.68E-11   |
| Asa2G05210 | HMG box domain-containing protein                                                      | 35.37     | 41.71     | 44.97     | 40.68  | 153.09   | 169.1    | 127.13   | 149.77  | 3.68   | 2.22E-11   |
| Asa6G00382 | RNA-binding protein                                                                    | 130.41    | 113.34    | 118.2     | 120.65 | 343.47   | 466.41   | 426.7    | 412.19  | 3.42   | 2.23E-11   |
| Asa2G06677 | DUF4005 domain-containing protein                                                      | 3.96      | 3.37      | 4.71      | 4.01   | 13.57    | 16.74    | 15.08    | 15.13   | 3.77   | 2.96E-11   |
| Asa2G05211 | HMG box domain-containing protein                                                      | 20.79     | 25.47     | 25.52     | 23.93  | 92.53    | 102.87   | 76.76    | 90.72   | 3.79   | 2.97E-11   |
| Asa5G00700 | GDSL esterase/lipase                                                                   | 3.45      | 2.03      | 3.34      | 2.94   | 11.15    | 13.23    | 11.61    | 12      | 4.08   | 1.15E-10   |
| Asa0G02660 | Glycosyltransferase                                                                    | 5.37      | 6.48      | 9.23      | 7.03   | 21.4     | 29.38    | 26.15    | 25.64   | 3.65   | 3.04E-10   |
| Asa0G00825 | Unknown protein                                                                        | 1.36      | 0.73      | 3.2       | 1.76   | 11.03    | 11.18    | 10.01    | 10.74   | 6.09   | 4.28E-10   |
| Asa6G02030 | Nop domain-containing protein                                                          | 21.79     | 18.97     | 18.48     | 19.75  | 53.76    | 72.15    | 65.33    | 63.75   | 3.23   | 6.35E-10   |
| Asa0G03399 | acid beta-fructofuranosidase-like                                                      | 59.13     | 64.46     | 67.05     | 63.55  | 173.73   | 228.04   | 225.69   | 209.15  | 3.29   | 6.40E-10   |
| Asa4G04450 | Sorghum bicolor protein targeted either to mitochondria or chloroplast proteins T50848 | 72.7      | 54.45     | 37.11     | 54.75  | 194.63   | 177.9    | 152.96   | 175.16  | 3.2    | 1.52E-09   |
| Asa5G01836 | Tryptophan aminotransferase-related protein 4                                          | 0         | 0         | 0         | 0      | 1.97     | 5.9      | 5.88     | 4.58    | 458.33 | 1.62E-09   |
| Asa6G03055 | beta-fructofuranosidase 1                                                              | 60.75     | 64.88     | 66.91     | 64.18  | 176.52   | 228.73   | 197.19   | 200.81  | 3.13   | 2.04E-09   |
| Asa2G05184 | Glutathione S-transferase                                                              | 0.72      | 1.02      | 1.07      | 0.94   | 3.45     | 5.01     | 3.89     | 4.12    | 4.4    | 2.42E-09   |
| Asa6G04605 | Delta-1-pyrroline-5-carboxylate synthase                                               | 4.91      | 4.66      | 6.31      | 5.29   | 19.21    | 23.46    | 26.35    | 23.01   | 4.35   | 2.90E-09   |
| Asa6G05355 | Alpha,alpha-trehalose-phosphate synthase                                               | 6.68      | 6.71      | 6.51      | 6.63   | 19.31    | 25.81    | 17.77    | 20.96   | 3.16   | 3.41E-09   |
| Asa2G04907 | Cold regulated protein 27                                                              | 7.46      | 3.74      | 3.23      | 4.81   | 21.09    | 17.56    | 17.67    | 18.77   | 3.9    | 4.00E-09   |
| Asa6G05180 | UPF0481-like protein                                                                   | 1.85      | 2.45      | 3.35      | 2.55   | 11.36    | 10.62    | 7.5      | 9.83    | 3.85   | 5.66E-09   |
| Asa7G03750 | Cyclin                                                                                 | 1.46      | 1.35      | 1.63      | 1.48   | 5.33     | 8.7      | 7.12     | 7.05    | 4.76   | 6.48E-09   |
| Asa7G06821 | rRNA 2'-O-methyltransferase fibrillarin                                                | 40.19     | 36.17     | 37.03     | 37.8   | 96.34    | 126.83   | 125.96   | 116.38  | 3.08   | 6.53E-09   |
| Asa5G03265 | Class I heat shock-like protein                                                        | 54.13     | 41.37     | 56.62     | 50.71  | 173.74   | 142.06   | 176.11   | 163.97  | 3.23   | 8.34E-09   |
| Asa7G00755 | Nucleolar pre-ribosomal-associated protein 1                                           | 0.98      | 0.95      | 1.23      | 1.05   | 3.08     | 4.71     | 3.44     | 3.74    | 3.55   | 9.79E-09   |
| Asa7G05831 | Polygalacturonase                                                                      | 0.57      | 0.5       | 0.79      | 0.62   | 3.21     | 4.15     | 3.43     | 3.6     | 5.8    | 1.93E-08   |
| Asa0G03977 | NUFIP1 domain-containing protein                                                       | 3.03      | 2.17      | 2.23      | 2.48   | 7.08     | 10.66    | 7.94     | 8.56    | 3.46   | 1.94E-08   |

|            |                                                                 |        |        |        |        |        |        |        |        |        |          |
|------------|-----------------------------------------------------------------|--------|--------|--------|--------|--------|--------|--------|--------|--------|----------|
| Asa4G04023 | Glutathione S-transferase                                       | 15.21  | 21.38  | 19.83  | 18.81  | 56.61  | 65.33  | 58.17  | 60.04  | 3.19   | 3.21E-08 |
| Asa5G03572 | probable rRNA-processing protein EBP2 homolog                   | 21.85  | 19.3   | 20.89  | 20.68  | 50.61  | 73.61  | 66.08  | 63.43  | 3.07   | 3.91E-08 |
| Asa0G03398 | beta-fructofuranosidase 1                                       | 66.26  | 70.42  | 70.94  | 69.21  | 189.78 | 244.24 | 162.11 | 198.71 | 2.87   | 4.19E-08 |
| Asa6G04606 | Delta-1-pyrroline-5-carboxylate synthase                        | 5.26   | 4.21   | 5.8    | 5.09   | 17.72  | 20.96  | 24.55  | 21.08  | 4.14   | 4.56E-08 |
| Asa4G05372 | C2H2-type domain-containing protein                             | 106.6  | 86.93  | 100.03 | 97.85  | 266.4  | 408.75 | 354.75 | 343.3  | 3.51   | 4.92E-08 |
| Asa8G02291 | DUF4057 domain-containing protein                               | 11.28  | 13.88  | 16.12  | 13.76  | 37.7   | 52.1   | 50.48  | 46.76  | 3.4    | 5.43E-08 |
| Asa1G04080 | Glutathione S-transferase                                       | 12.59  | 10.39  | 10.66  | 11.21  | 31.34  | 38.59  | 34.31  | 34.75  | 3.1    | 6.98E-08 |
| Asa0G04659 | Superoxide dismutase                                            | 2.83   | 3.15   | 2.87   | 2.95   | 13.06  | 14.41  | 13.49  | 13.65  | 4.63   | 8.06E-08 |
| Asa8G02356 | Unknown protein                                                 | 3.19   | 2.51   | 4.28   | 3.33   | 13.32  | 12.08  | 15.85  | 13.75  | 4.13   | 8.15E-08 |
| Asa5G04334 | PMEI domain-containing protein                                  | 6.49   | 3.1    | 7.89   | 5.83   | 17.4   | 24.53  | 23.06  | 21.66  | 3.72   | 1.36E-07 |
| Asa1G04599 | PREDICTED: homeobox-leucine zipper                              | 2.8    | 3.08   | 2.89   | 2.92   | 8.46   | 10.79  | 10.18  | 9.81   | 3.36   | 1.40E-07 |
| Asa0G03209 | DNA-damage-repair/toleration protein                            | 2.34   | 3.02   | 2.99   | 2.78   | 12.54  | 9.3    | 10.57  | 10.8   | 3.88   | 1.79E-07 |
| Asa0G03535 | FAD_binding_3 domain-containing protein                         | 15.43  | 22.53  | 27.62  | 21.86  | 65.65  | 74.81  | 83.82  | 74.76  | 3.42   | 1.90E-07 |
| Asa4G05697 | AT-hook motif nuclear-localized protein                         | 14.37  | 14.92  | 15.67  | 14.99  | 38.69  | 49.94  | 52.69  | 47.11  | 3.14   | 2.25E-07 |
| Asa5G00832 | WD_REPEATS_REGION domain-containing protein                     | 15.22  | 14.19  | 16.88  | 15.43  | 35.31  | 47.76  | 45.8   | 42.96  | 2.78   | 2.27E-07 |
| Asa3G02030 | PREDICTED: long chain acyl-CoA synthetase                       | 22.88  | 13.89  | 24.29  | 20.35  | 52.93  | 59.94  | 66.06  | 59.64  | 2.93   | 2.83E-07 |
| Asa1G04440 | vacuolar-processing enzyme                                      | 80.08  | 69.14  | 60.97  | 70.06  | 216.63 | 241.59 | 288.99 | 249.07 | 3.55   | 2.83E-07 |
| Asa0G04964 | Non-symbiotic hemoglobin, putative                              | 218.61 | 184.49 | 156.7  | 186.6  | 497.71 | 536.24 | 507.14 | 513.7  | 2.75   | 2.97E-07 |
| Asa7G01394 | Glycos_transf_1 domain-containing protein                       | 19.57  | 18.96  | 19.6   | 19.38  | 47.62  | 64.4   | 44.26  | 52.09  | 2.69   | 3.12E-07 |
| Asa7G03512 | Regulator of Vps4 activity in the MVB pathway protein, putative | 1.41   | 1.58   | 1.18   | 1.39   | 5.19   | 5.85   | 7.19   | 6.08   | 4.37   | 3.14E-07 |
| Asa7G06817 | vacuolar-processing enzyme                                      | 80.54  | 69.65  | 61.01  | 70.4   | 216.49 | 241.95 | 289.19 | 249.21 | 3.54   | 3.31E-07 |
| Asa6G03848 | Sequence-specific DNA binding transcription factor              | 4.96   | 4.58   | 4.57   | 4.7    | 19.11  | 35.15  | 26.62  | 26.96  | 5.73   | 3.41E-07 |
| Asa5G01566 | Lipoxygenase                                                    | 15.42  | 14.02  | 21.63  | 17.02  | 119.18 | 78.15  | 79.05  | 92.13  | 5.41   | 4.05E-07 |
| Asa0G01843 | NUFIP1 domain-containing protein                                | 3.28   | 2.8    | 3.31   | 3.13   | 8.12   | 12.05  | 8.67   | 9.61   | 3.07   | 4.09E-07 |
| Asa2G02244 | Gamma-irradiation and mitomycin c induced 1                     | 0.1    | 0.17   | 0.13   | 0.13   | 0.57   | 0.93   | 0.61   | 0.7    | 5.27   | 4.09E-07 |
| Asa3G03426 | Xyloglucan endotransglucosylase/hydrolase                       | 0.09   | 0.05   | 0.17   | 0.1    | 0.99   | 2.06   | 1.32   | 1.46   | 14.1   | 4.18E-07 |
| Asa3G03884 | Late embryogenesis abundant protein                             | 0      | 0.11   | 0      | 0.04   | 15.72  | 12.92  | 29.25  | 19.3   | 526.27 | 4.54E-07 |
| Asa5G04416 | tRNA pseudouridine synthase B family                            | 4.59   | 3.95   | 4.92   | 4.49   | 11.07  | 16.34  | 11.13  | 12.85  | 2.86   | 5.33E-07 |
| Asa1G00939 | HTH-type transcriptional regulator protein ptxE                 | 2.32   | 1.78   | 1.91   | 2      | 8.63   | 16.34  | 12.89  | 12.62  | 6.3    | 6.17E-07 |
| Asa5G05592 | Cytochrome P450 family protein, expressed                       | 5.32   | 1.81   | 4.51   | 3.88   | 10.8   | 14.98  | 13.64  | 13.14  | 3.39   | 6.24E-07 |
| Asa3G04155 | Pyruvate decarboxylase                                          | 37.72  | 36.36  | 46.42  | 40.17  | 92.66  | 114.64 | 120.18 | 109.16 | 2.72   | 6.34E-07 |
| Asa3G03580 | Putative ATP synthase subunit g, mitochondrial-like             | 2.22   | 1.61   | 3.48   | 2.44   | 7.28   | 9.78   | 9.2    | 8.75   | 3.59   | 8.14E-07 |
| Asa8G02873 | AP2/ERF domain-containing transcription factor                  | 15.83  | 16.25  | 15.86  | 15.98  | 42.94  | 52.36  | 34.95  | 43.42  | 2.72   | 8.50E-07 |
| Asa8G04000 | GDSL esterase/lipase                                            | 7.58   | 4.59   | 7.28   | 6.48   | 21.09  | 19.76  | 25.36  | 22.07  | 3.4    | 8.63E-07 |
| Asa7G05861 | Polygalacturonase inhibitor protein                             | 15.41  | 15.11  | 21.43  | 17.32  | 74     | 68.18  | 44.67  | 62.28  | 3.6    | 8.86E-07 |
| Asa1G03116 | MYB-related transcription factor                                | 6.47   | 4.9    | 9.04   | 6.8    | 25.67  | 22.31  | 16.8   | 21.59  | 3.17   | 9.10E-07 |
| Asa4G06437 | tRNA pseudouridine synthase B family                            | 3.76   | 2.76   | 3.64   | 3.39   | 8.67   | 12.28  | 8.29   | 9.75   | 2.88   | 9.36E-07 |
| Asa4G04015 | RNA binding protein                                             | 42.03  | 40.37  | 43.44  | 41.95  | 95.68  | 145.42 | 125.73 | 122.28 | 2.92   | 1.01E-06 |
| Asa1G04399 | Homeobox protein, putative                                      | 124.24 | 133.72 | 132.74 | 130.23 | 344.05 | 394.25 | 289.27 | 342.52 | 2.63   | 1.12E-06 |
| Asa6G05961 | Cryptochrome                                                    | 9.23   | 9.82   | 10.54  | 9.86   | 25.75  | 28.49  | 28.46  | 27.57  | 2.79   | 1.19E-06 |
| Asa1G04136 | Glutamine amidotransferase type-2 domain-containing protein     | 20.61  | 19.6   | 23.29  | 21.17  | 51.01  | 67.68  | 70.39  | 63.03  | 2.98   | 1.52E-06 |
| Asa3G00251 | Plant cysteine oxidase 2                                        | 2.09   | 2.46   | 2.49   | 2.35   | 7.23   | 9.4    | 8.68   | 8.44   | 3.6    | 1.57E-06 |

|            |                                                              |        |        |        |        |        |        |        |        |        |          |
|------------|--------------------------------------------------------------|--------|--------|--------|--------|--------|--------|--------|--------|--------|----------|
| Asa8G06192 | Unknown protein                                              | 5.53   | 4.91   | 6.95   | 5.8    | 20.73  | 23.22  | 15.41  | 19.79  | 3.41   | 1.64E-06 |
| Asa1G04590 | PREDICTED: homeobox-leucine zipper                           | 5.11   | 5.38   | 5.27   | 5.25   | 13.79  | 16.73  | 12.54  | 14.35  | 2.73   | 1.81E-06 |
| Asa4G01307 | DNA helicase                                                 | 5.1    | 3.7    | 4.84   | 4.55   | 13.39  | 22.7   | 15.74  | 17.28  | 3.8    | 1.87E-06 |
| Asa6G05066 | Unknown protein                                              | 0.83   | 0.62   | 0.63   | 0.69   | 56.3   | 53.06  | 116.58 | 75.31  | 108.62 | 1.93E-06 |
| Asa3G02287 | DNA replication licensing factor MCM7                        | 3.53   | 3.67   | 4.11   | 3.77   | 12.99  | 23.62  | 18.68  | 18.43  | 4.89   | 2.02E-06 |
| Asa6G06172 | ATP-dependent RNA helicase                                   | 23.2   | 21.24  | 22.39  | 22.28  | 49.15  | 75.78  | 55.83  | 60.25  | 2.7    | 2.16E-06 |
| Asa7G00754 | Nucleolar pre-ribosomal-associated protein 1                 | 3.07   | 3.03   | 2.43   | 2.84   | 10.28  | 10.56  | 8.01   | 9.62   | 3.38   | 2.34E-06 |
| Asa4G04588 | Elongation factor 1-beta 1                                   | 154.18 | 153.99 | 160.76 | 156.31 | 317.86 | 465.14 | 399.97 | 394.32 | 2.52   | 2.60E-06 |
| Asa4G01308 | DNA helicase                                                 | 3.92   | 4.2    | 4.55   | 4.22   | 14.37  | 25.96  | 18.34  | 19.56  | 4.63   | 2.72E-06 |
| Asa4G06071 | Tryptophan aminotransferase-related protein 4                | 21.47  | 23.34  | 34.11  | 26.31  | 65.58  | 78.54  | 65.45  | 69.86  | 2.66   | 2.87E-06 |
| Asa6G04352 | Early nodulin-93                                             | 0.24   | 0.54   | 0.18   | 0.32   | 17.08  | 15.93  | 32.48  | 21.83  | 68.22  | 3.09E-06 |
| Asa6G00931 | Auxin response factor                                        | 8.89   | 9.12   | 9.95   | 9.32   | 20.45  | 27.42  | 25.3   | 24.39  | 2.62   | 3.24E-06 |
| Asa2G03391 | Protein arginine N-methyltransferase                         | 3.7    | 3.08   | 4.07   | 3.62   | 15.56  | 22.42  | 11.72  | 16.57  | 4.58   | 3.64E-06 |
| Asa5G05210 | PREDICTED: ATP-dependent RNA helicase                        | 3.15   | 2.61   | 2.63   | 2.8    | 7.22   | 8.38   | 9.65   | 8.42   | 3.01   | 3.66E-06 |
| Asa4G02510 | Ethylene-responsive transcription factor ERF-like protein    | 6.69   | 4.3    | 5.13   | 5.37   | 15.88  | 17.07  | 15.99  | 16.31  | 3.04   | 3.72E-06 |
| Asa3G02582 | Dihydroflavonol 4-reductase                                  | 0.47   | 0.24   | 0.69   | 0.47   | 1.96   | 3.7    | 2.53   | 2.73   | 5.85   | 3.99E-06 |
| Asa4G04780 | Putative transcription factor bHLH family                    | 6.22   | 5.85   | 7.74   | 6.6    | 17.35  | 26.72  | 25.37  | 23.15  | 3.51   | 4.29E-06 |
| Asa1G04138 | Glutamine amidotransferase type-2 domain-containing protein  | 68.94  | 60.89  | 70.57  | 66.8   | 156.48 | 172.52 | 185.3  | 171.43 | 2.57   | 4.32E-06 |
| Asa6G06028 | SHSP domain-containing protein                               | 15.39  | 15.26  | 17.27  | 15.97  | 49.45  | 54.81  | 32.53  | 45.6   | 2.85   | 5.23E-06 |
| Asa3G02781 | GST C-terminal domain-containing protein                     | 13.16  | 11.35  | 12.39  | 12.3   | 25.87  | 37.48  | 31.31  | 31.55  | 2.57   | 5.52E-06 |
| Asa7G03751 | Cyclin                                                       | 1.42   | 1.37   | 1.82   | 1.54   | 5.07   | 8.87   | 8.01   | 7.32   | 4.76   | 5.58E-06 |
| Asa4G01176 | Ethylene-responsive transcription factor                     | 118.36 | 132.6  | 133.05 | 128    | 296.83 | 350.99 | 340.37 | 329.4  | 2.57   | 5.63E-06 |
| Asa7G03955 | Subtilisin-like protease                                     | 0.02   | 0      | 0.01   | 0.01   | 0.4    | 0.32   | 0.37   | 0.36   | 36.33  | 5.80E-06 |
| Asa2G03624 | ENT domain-containing protein                                | 9.71   | 7.92   | 9.35   | 8.99   | 22.01  | 27.31  | 20.47  | 23.26  | 2.59   | 5.94E-06 |
| Asa1G04137 | Glutamine amidotransferase type-2 domain-containing protein  | 61.06  | 54.42  | 63.06  | 59.51  | 152.26 | 169.78 | 125.49 | 149.18 | 2.51   | 6.03E-06 |
| Asa5G04502 | UPF0020 domain-containing protein                            | 10.66  | 10.09  | 10.13  | 10.29  | 23.16  | 29.01  | 28.74  | 26.97  | 2.62   | 6.58E-06 |
| Asa2G03630 | Cellulose synthase                                           | 9.46   | 9.29   | 10.4   | 9.72   | 20.44  | 31.57  | 23.49  | 25.17  | 2.59   | 6.95E-06 |
| Asa6G06355 | Unknown protein                                              | 2.35   | 2.11   | 2.92   | 2.46   | 10.38  | 11.75  | 12.33  | 11.49  | 4.67   | 7.34E-06 |
| Asa8G05009 | Beta-glucosidase                                             | 2.47   | 2.41   | 2.42   | 2.43   | 7.06   | 8.19   | 5.35   | 6.87   | 2.82   | 7.60E-06 |
| Asa4G04971 | Heat shock protein 90                                        | 30.04  | 28.53  | 30.83  | 29.8   | 69.81  | 79.17  | 76.16  | 75.05  | 2.52   | 7.65E-06 |
| Asa2G01005 | NHL domain-containing protein                                | 16.76  | 16.46  | 19.02  | 17.41  | 37.86  | 52.07  | 39.82  | 43.25  | 2.48   | 8.38E-06 |
| Asa1G04397 | Homeobox protein, putative                                   | 50.82  | 64.72  | 56.75  | 57.43  | 143.09 | 165.38 | 129.36 | 145.94 | 2.54   | 8.54E-06 |
| Asa2G01440 | Mitochondrial glycoprotein-like                              | 1.49   | 1.6    | 1.97   | 1.69   | 6.25   | 6.64   | 6.05   | 6.31   | 3.74   | 8.79E-06 |
| Asa6G03878 | Exocyst subunit Exo70 family protein                         | 2.2    | 2.43   | 2.97   | 2.53   | 8.15   | 15.05  | 11.33  | 11.51  | 4.54   | 9.08E-06 |
| Asa3G04256 | Protein kinase domain-containing protein                     | 16.95  | 11.54  | 17.16  | 15.22  | 35.11  | 45.16  | 40.39  | 40.22  | 2.64   | 9.24E-06 |
| Asa8G00439 | EGF domain-specific O-linked N-acetylglucosamine transferase | 0.36   | 0.17   | 0.34   | 0.29   | 1.26   | 1.81   | 1.73   | 1.6    | 5.52   | 9.87E-06 |
| Asa8G00594 | DNA-directed RNA polymerase                                  | 3.97   | 3.92   | 4.05   | 3.98   | 9.01   | 12.04  | 9.63   | 10.23  | 2.57   | 1.06E-05 |
| Asa7G01216 | Exostosin domain-containing protein                          | 3.9    | 3.75   | 4.83   | 4.16   | 13.11  | 21.1   | 12.55  | 15.59  | 3.75   | 1.11E-05 |
| Asa2G02116 | Poly [ADP-ribose] polymerase                                 | 1.87   | 1.7    | 1.82   | 1.8    | 4.46   | 6.39   | 4.54   | 5.13   | 2.86   | 1.21E-05 |
| Asa4G02418 | Acyl-[acyl-carrier-protein] desaturase                       | 7.69   | 8.81   | 10.08  | 8.86   | 25.75  | 24.75  | 23.84  | 24.78  | 2.8    | 1.22E-05 |
| Asa4G05035 | Urb2 domain-containing protein                               | 3.04   | 3.27   | 3.43   | 3.25   | 7.67   | 10.05  | 7.16   | 8.29   | 2.55   | 1.26E-05 |
| Asa1G04665 | IQ domain-containing protein IQM3                            | 7.52   | 8.53   | 8.78   | 8.28   | 18.48  | 25.86  | 18.57  | 20.97  | 2.53   | 1.31E-05 |
| Asa2G05429 | Nuclear pore complex protein Nup188                          | 3.11   | 3.16   | 3.48   | 3.25   | 7.29   | 9.28   | 7.91   | 8.16   | 2.51   | 1.35E-05 |
| Asa5G00546 | rRNA biogenesis protein rrp5                                 | 5.36   | 5.04   | 5.61   | 5.34   | 11.23  | 15.39  | 12.2   | 12.94  | 2.42   | 1.40E-05 |

|            |                                                      |        |        |        |        |         |         |        |         |        |          |
|------------|------------------------------------------------------|--------|--------|--------|--------|---------|---------|--------|---------|--------|----------|
| Asa7G05865 | Polygalacturonase inhibitor                          | 0.89   | 0.92   | 1.07   | 0.96   | 2.89    | 4.46    | 3.78   | 3.71    | 3.86   | 1.41E-05 |
| Asa6G02702 | Alcohol dehydrogenase, putative                      | 31.2   | 26.28  | 34.76  | 30.75  | 60.49   | 89.84   | 68.45  | 72.93   | 2.37   | 1.46E-05 |
| Asa7G06688 | Glutathione S-transferase                            | 9.91   | 10.17  | 8.07   | 9.38   | 41.03   | 69.93   | 75.08  | 62.01   | 6.61   | 1.49E-05 |
| Asa1G03513 | Reductase                                            | 0.05   | 0.09   | 0.43   | 0.19   | 10.61   | 43.05   | 49.58  | 34.41   | 181.12 | 1.52E-05 |
| Asa6G04933 | H/ACA ribonucleoprotein complex subunit              | 91.54  | 85.32  | 88.9   | 88.59  | 170.72  | 246.17  | 221.06 | 212.65  | 2.4    | 1.63E-05 |
| Asa7G04927 | NAC domain-containing protein                        | 0.2    | 0.41   | 0.77   | 0.46   | 3.61    | 4.46    | 3.14   | 3.74    | 8.12   | 1.87E-05 |
| Asa0G04509 | Anthranilate synthase                                | 3.01   | 2.46   | 2.64   | 2.7    | 6.86    | 8.18    | 9.63   | 8.22    | 3.04   | 2.06E-05 |
| Asa2G07067 | FAD_binding_3 domain-containing protein              | 9.35   | 11.58  | 12.66  | 11.2   | 29.33   | 32.24   | 38.88  | 33.48   | 2.99   | 2.30E-05 |
| Asa8G02697 | WD_REPEATS_REGION domain-containing protein          | 14.18  | 12.57  | 13.73  | 13.49  | 27.96   | 35.95   | 37.78  | 33.9    | 2.51   | 2.32E-05 |
| Asa4G00735 | Fatty acid hydroxylase domain-containing protein     | 12.89  | 11.85  | 13.86  | 12.87  | 33.75   | 33.04   | 34.38  | 33.72   | 2.62   | 2.50E-05 |
| Asa6G06459 | BHLH transcription factor                            | 6.27   | 6.99   | 9.87   | 7.71   | 22.02   | 22.77   | 22.81  | 22.53   | 2.92   | 2.50E-05 |
| Asa1G03751 | Outer envelope pore protein 16-2, chloroplastic      | 16.83  | 15.47  | 18.79  | 17.03  | 57.09   | 90.17   | 97.28  | 81.51   | 4.79   | 2.67E-05 |
| Asa7G06687 | Glutathione S-transferase                            | 172.3  | 151.77 | 188.61 | 170.89 | 517.78  | 830.43  | 859.54 | 735.92  | 4.31   | 2.89E-05 |
| Asa6G00471 | Wound-responsive family protein                      | 3.07   | 3.32   | 1.86   | 2.75   | 9.05    | 11.66   | 12.91  | 11.21   | 4.08   | 2.89E-05 |
| Asa4G01865 | RNA binding protein                                  | 210.45 | 204.29 | 206.81 | 207.18 | 496.59  | 516.11  | 501.62 | 504.77  | 2.44   | 2.97E-05 |
| Asa0G03896 | Ia protein 1-like                                    | 34.37  | 30.36  | 34.4   | 33.04  | 73.84   | 90.02   | 67.86  | 77.24   | 2.34   | 2.98E-05 |
| Asa5G02639 | Protein kinase, putative                             | 0.95   | 0.95   | 0.75   | 0.88   | 2.12    | 2.98    | 2.71   | 2.6     | 2.95   | 2.99E-05 |
| Asa7G01851 | Prolyl oligopeptidase family protein                 | 0.65   | 0.36   | 0.46   | 0.49   | 1.36    | 1.85    | 1.86   | 1.69    | 3.45   | 3.01E-05 |
| Asa8G04785 | NHL domain-containing protein                        | 9.86   | 10.3   | 12.8   | 10.99  | 23.4    | 35.08   | 24.08  | 27.52   | 2.5    | 3.03E-05 |
| Asa2G05078 | Ia protein 1-like                                    | 37.92  | 33.53  | 37.75  | 36.4   | 81.18   | 98.39   | 75.56  | 85.04   | 2.34   | 3.18E-05 |
| Asa7G02455 | Kinase family protein                                | 10.38  | 11.52  | 12.75  | 11.55  | 22.86   | 33.56   | 30.41  | 28.94   | 2.51   | 3.32E-05 |
| Asa4G05584 | 60 kDa chaperonin                                    | 25.58  | 22.03  | 24.78  | 24.13  | 54.12   | 62.62   | 54.78  | 57.17   | 2.37   | 3.43E-05 |
| Asa3G03068 | Nuclear transcription factor Y subunit C-4, putative | 5.63   | 4.57   | 4.71   | 4.97   | 11.33   | 18.35   | 13.32  | 14.33   | 2.88   | 3.47E-05 |
| Asa0G04495 | Inosine-5'-monophosphate dehydrogenase               | 4.8    | 5.18   | 5.2    | 5.06   | 12.64   | 16.74   | 12.29  | 13.89   | 2.75   | 3.53E-05 |
| Asa5G04860 | Inosine-5'-monophosphate dehydrogenase               | 7.87   | 7.28   | 8.26   | 7.8    | 15.56   | 22.92   | 18.03  | 18.84   | 2.41   | 3.72E-05 |
| Asa2G05715 | Heat shock 70 kDa protein                            | 528.28 | 482.89 | 620    | 543.72 | 1103.09 | 1387.53 | 1311.8 | 1267.47 | 2.33   | 3.87E-05 |
| Asa7G06850 | Zinc finger CCHC domain-containing protein           | 5.15   | 5.45   | 5.91   | 5.5    | 13.21   | 17.64   | 13.01  | 14.62   | 2.66   | 4.08E-05 |
| Asa2G05234 | DNA polymerase epsilon catalytic subunit             | 1      | 1.07   | 1.29   | 1.12   | 2.88    | 5.1     | 3.76   | 3.91    | 3.49   | 4.16E-05 |
| Asa6G03995 | Macrophage migration inhibitory factor               | 67.01  | 85.08  | 98.53  | 83.54  | 213.49  | 231.17  | 173.91 | 206.19  | 2.47   | 4.20E-05 |
| Asa3G03067 | Unknown protein                                      | 10.94  | 5.93   | 8.24   | 8.37   | 18.37   | 27.77   | 19.87  | 22      | 2.63   | 4.22E-05 |
| Asa0G04029 | Phosphotransferase                                   | 18.69  | 16.52  | 19.08  | 18.1   | 57.65   | 84.73   | 96.25  | 79.54   | 4.4    | 4.27E-05 |
| Asa2G02186 | peroxygenase-like                                    | 0.39   | 0.19   | 0.44   | 0.34   | 7.74    | 9.86    | 17.68  | 11.76   | 34.59  | 4.48E-05 |
| Asa6G01270 | Chaperone DnaK                                       | 42.18  | 40.06  | 44.47  | 42.24  | 88.28   | 111.57  | 95.48  | 98.44   | 2.33   | 4.56E-05 |
| Asa2G06174 | RNA binding protein                                  | 12.57  | 10.45  | 12.65  | 11.89  | 41.22   | 82.78   | 54.98  | 59.66   | 5.02   | 4.62E-05 |
| Asa8G02695 | WD_REPEATS_REGION domain-containing protein          | 15.76  | 14.02  | 15.32  | 15.03  | 30.58   | 39      | 40.23  | 36.6    | 2.43   | 4.77E-05 |
| Asa0G03895 | Cryptochrome                                         | 8.62   | 8.28   | 8.58   | 8.49   | 19.87   | 23.06   | 18.67  | 20.53   | 2.42   | 4.86E-05 |
| Asa3G01073 | CRC domain-containing protein                        | 0.22   | 0.37   | 0.32   | 0.3    | 1.25    | 2.57    | 2.2    | 2.01    | 6.62   | 4.89E-05 |
| Asa5G02237 | Early nodulin-93                                     | 0.24   | 0.34   | 0.18   | 0.25   | 13.87   | 13.76   | 30.5   | 19.38   | 76.49  | 5.01E-05 |
| Asa2G02082 | Phytochrome                                          | 3.73   | 4.95   | 5.01   | 4.56   | 10.28   | 12.54   | 11.2   | 11.34   | 2.49   | 5.29E-05 |
| Asa7G05135 | GDSL esterase/lipase                                 | 4.75   | 5.13   | 6.12   | 5.33   | 11.1    | 16.07   | 13.97  | 13.71   | 2.57   | 5.30E-05 |
| Asa6G04934 | H/ACA ribonucleoprotein complex subunit              | 79.23  | 75.42  | 78.38  | 77.68  | 149.39  | 214.72  | 168.35 | 177.49  | 2.28   | 5.42E-05 |
| Asa1G03227 | mini-chromosome maintenance complex-binding protein  | 1.68   | 1.47   | 1.59   | 1.58   | 5.17    | 9.1     | 5.27   | 6.51    | 4.12   | 5.43E-05 |
| Asa3G03312 | Carboxypeptidase                                     | 1.58   | 0.62   | 1.42   | 1.21   | 2.99    | 4.25    | 3.33   | 3.52    | 2.92   | 5.49E-05 |

|            |                                                                     |        |        |        |        |        |         |         |         |         |             |
|------------|---------------------------------------------------------------------|--------|--------|--------|--------|--------|---------|---------|---------|---------|-------------|
| Asa8G02536 | NAC domain-containing protein                                       | 0.88   | 1.18   | 0.78   | 0.95   | 2.71   | 4.39    | 4.18    | 3.76    | 3.97    | 5.50E-05    |
| Asa4G00750 | Putative 60S ribosomal protein L7                                   | 74.85  | 68.01  | 74.28  | 72.38  | 143.79 | 195.09  | 156.95  | 165.28  | 2.28    | 5.54E-05    |
| Asa7G01192 | Senescence-associated protein                                       | 1.77   | 2.09   | 2.11   | 1.99   | 5.73   | 9.73    | 7.54    | 7.67    | 3.85    | 5.56E-05    |
| Asa0G02120 | Unknown protein                                                     | 152.08 | 121.58 | 144.69 | 139.45 | 302.35 | 328.62  | 372.28  | 334.42  | 2.4     | 5.72E-05    |
| Asa6G04169 | DNA-directed RNA polymerase subunit                                 | 5.44   | 6.33   | 6.45   | 6.07   | 11.77  | 16.09   | 15.63   | 14.5    | 2.39    | 5.78E-05    |
| Asa7G00251 | Protein kinase                                                      | 2.68   | 1.86   | 2.5    | 2.35   | 5.84   | 10.14   | 8.98    | 8.32    | 3.55    | 5.91E-05    |
| Asa4G00764 | Hydroxyproline-rich glycoprotein family protein, putative isoform 2 | 0.89   | 0.46   | 0.95   | 0.77   | 1.93   | 3.26    | 2.78    | 2.66    | 3.47    | 5.94E-05    |
| Asa5G00519 | Unknown protein                                                     | 0.07   | 0      | 0.06   | 0.04   | 0.45   | 229.48  | 254.66  | 161.53  | 3727.62 | 6.06E-05    |
| Asa8G04505 | High mobility group B protein                                       | 3.43   | 3.6    | 3.25   | 3.43   | 7.63   | 11.26   | 10.24   | 9.71    | 2.83    | 6.12E-05    |
| Asa7G06189 | cell division control protein 45 homolog                            | 0.42   | 0.33   | 0.36   | 0.37   | 1.35   | 2.86    | 2.05    | 2.09    | 5.64    | 6.27E-05    |
| Asa6G01192 | glucomannan 4-beta-mannosyltransferase 9                            | 14.09  | 12.68  | 16.44  | 14.4   | 28.12  | 40.99   | 28.77   | 32.63   | 2.27    | 6.29E-05    |
| Asa2G02360 | Cyclic AMP-responsive element-binding 3                             | 1.98   | 0.99   | 2      | 1.66   | 4.47   | 7.47    | 7.03    | 6.32    | 3.82    | 6.31E-05    |
| Asa2G06687 | GTP-binding nuclear protein                                         | 212.35 | 205.47 | 215.6  | 211.14 | 415.67 | 550.31  | 479.16  | 481.71  | 2.28    | 6.57E-05    |
| Asa7G03580 | Tubulin-tyrosine ligase                                             | 8.12   | 7.87   | 8.62   | 8.2    | 17.74  | 20.97   | 20.11   | 19.61   | 2.39    | 6.74E-05    |
| Asa4G02636 | DNA-directed RNA polymerases II and V subunit 6B-like               | 20.39  | 19.33  | 23.06  | 20.93  | 48.27  | 58.95   | 46.26   | 51.16   | 2.44    | 6.74E-05    |
| Asa8G00476 | Sialidase domain-containing protein                                 | 5.55   | 4.96   | 4.64   | 5.05   | 10.96  | 15.67   | 10.45   | 12.36   | 2.45    | 6.83E-05    |
| Asa4G00414 | Retrovirus-related Pol polyprotein from transposon TNT 1-94         | 1.87   | 1.97   | 1.98   | 1.94   | 4.64   | 6.34    | 4.35    | 5.11    | 2.63    | 6.96E-05    |
| Asa7G07105 | Putative GTP-binding protein EngB                                   | 3.35   | 3.16   | 2.53   | 3.01   | 7.56   | 12.2    | 7.66    | 9.14    | 3.03    | 6.98E-05    |
| Asa8G02530 | Protein kinase domain-containing protein                            | 0.16   | 0.18   | 0.09   | 0.14   | 2.22   | 1.12    | 2.25    | 1.86    | 13      | 7.27E-05    |
| Asa0G04874 | RING-type domain-containing protein                                 | 10.53  | 11.51  | 10.73  | 10.92  | 22.94  | 33.28   | 27.57   | 27.93   | 2.56    | 7.57E-05    |
| Asa3G02334 | 40S ribosomal protein SA                                            | 67.49  | 65.36  | 72.76  | 68.54  | 132.89 | 178.58  | 159.4   | 156.96  | 2.29    | 7.66E-05    |
| Asa2G05304 | MYB-related transcription factor                                    | 13.67  | 12.83  | 10.37  | 12.29  | 25.78  | 38.6    | 25.86   | 30.08   | 2.45    | 7.68E-05    |
| Asa0G02121 | Gibberellin-regulated protein 1                                     | 505.51 | 408.05 | 485.81 | 466.46 | 988.59 | 1117.84 | 1103.85 | 1070.09 | 2.29    | 7.69E-05    |
| Asa4G00762 | Homeobox protein, putative                                          | 4.15   | 4.68   | 4.83   | 4.55   | 10.2   | 16.77   | 11.51   | 12.83   | 2.82    | 7.70E-05    |
| Asa3G03684 | Unknown protein                                                     | 6.84   | 2.97   | 3.84   | 4.55   | 13.31  | 18.06   | 20.59   | 17.32   | 3.81    | 7.75E-05    |
| Asa1G02705 | protein SMAX1-LIKE 3-like                                           | 0.12   | 0.18   | 0.13   | 0.14   | 0.98   | 2.13    | 1.12    | 1.41    | 9.84    | 8.36E-05    |
| Asa7G07166 | 10 kDa chaperonin family protein                                    | 67.11  | 65.71  | 73.69  | 68.84  | 150.46 | 187.23  | 141.56  | 159.75  | 2.32    | 8.52E-05    |
| Asa6G03520 | Elongation factor G 2                                               | 21.67  | 20.22  | 21.79  | 21.23  | 42.03  | 52.31   | 54.9    | 49.75   | 2.34    | 8.64E-05    |
| Asa5G05475 | PREDICTED: growth-regulating factor                                 | 0.53   | 0.06   | 0.73   | 0.44   | 3.35   | 8.68    | 4.89    | 5.64    | 12.82   | 8.71E-05    |
| Asa7G04329 | 50S ribosomal protein L22, chloroplastic                            | 2.13   | 1.27   | 1.54   | 1.65   | 5.45   | 6.4     | 4.76    | 5.54    | 3.36    | 9.00E-05    |
| Asa5G00850 | LRRNT_2 domain-containing protein                                   | 18.97  | 17.32  | 21.92  | 19.4   | 42.18  | 69.09   | 61.48   | 57.58   | 2.97    | 9.42E-05    |
| Asa2G00273 | Geranylgeranyl pyrophosphate synthase                               | 3.87   | 3.67   | 3.46   | 3.67   | 9.1    | 11.62   | 9.14    | 9.95    | 2.71    | 9.49E-05    |
| Asa2G05798 | PUM-HD domain-containing protein                                    | 11.03  | 9.91   | 11.79  | 10.91  | 20.97  | 29.68   | 23.17   | 24.61   | 2.26    | 9.52E-05    |
| Asa8G02566 | DUF632 domain-containing protein/DUF630 domain-containing protein   | 3.84   | 3.75   | 4.39   | 3.99   | 8.77   | 13.9    | 9.04    | 10.57   | 2.65    | 9.55E-05    |
| Asa6G01273 | Chaperone DnaK                                                      | 45.81  | 45.57  | 50.77  | 47.38  | 96.96  | 123.3   | 101.12  | 107.13  | 2.26    | 1.00E-04    |
| Asa2G01908 | DUF632 domain-containing protein                                    | 1.39   | 1.23   | 1.46   | 1.36   | 4.08   | 7.18    | 7.21    | 6.16    | 4.53    | 0.000116041 |
| Asa7G00606 | 50S ribosomal protein L2                                            | 54.05  | 50.34  | 57.36  | 53.92  | 103.83 | 131.73  | 136.2   | 123.92  | 2.3     | 0.000116282 |
| Asa7G05940 | Peptidase A1 domain-containing protein                              | 13.5   | 15.64  | 23.24  | 17.46  | 35.46  | 46.22   | 39.92   | 40.53   | 2.32    | 0.000117453 |
| Asa1G00253 | Putative cytochrome P450                                            | 0.76   | 0.82   | 0.82   | 0.8    | 1.93   | 3.09    | 2.91    | 2.64    | 3.3     | 0.000121986 |
| Asa5G01517 | Glucose-6-phosphate 1-dehydrogenase                                 | 79.02  | 80.41  | 84.53  | 81.32  | 158.11 | 200.19  | 196.83  | 185.04  | 2.28    | 0.000122436 |
| Asa4G06113 | Unknown protein                                                     | 6.94   | 5.25   | 8.17   | 6.79   | 16.2   | 21.47   | 24.02   | 20.56   | 3.03    | 0.000122436 |
| Asa5G02163 | Trypsin inhibitor                                                   | 110.04 | 112.97 | 85.33  | 102.78 | 483.62 | 419.41  | 255.89  | 386.31  | 3.76    | 0.000124149 |
| Asa1G00031 | HIG1 domain-containing protein                                      | 135.04 | 178.43 | 233.87 | 182.45 | 384.51 | 447.66  | 458.47  | 430.21  | 2.36    | 0.000125234 |
| Asa6G00894 | nucleolin                                                           | 25.62  | 26.42  | 26.29  | 26.11  | 48.91  | 70.85   | 64.52   | 61.43   | 2.35    | 0.000125954 |
| Asa2G03631 | Cellulose synthase                                                  | 13.98  | 11.85  | 13.75  | 13.19  | 25.16  | 39.53   | 28.13   | 30.94   | 2.35    | 0.000126181 |

|            |                                                                       |        |        |        |        |        |         |        |        |       |             |
|------------|-----------------------------------------------------------------------|--------|--------|--------|--------|--------|---------|--------|--------|-------|-------------|
| Asa6G02976 | Putative major facilitator superfamily domain-containing protein      | 2.44   | 0.93   | 2.06   | 1.81   | 11.02  | 29.99   | 27.17  | 22.73  | 12.56 | 0.000126278 |
| Asa4G00036 | Adenosylhomocysteinase                                                | 165.78 | 203.29 | 227.97 | 199.01 | 459.97 | 460.96  | 486.37 | 469.1  | 2.36  | 0.00012723  |
| Asa0G02564 | Protein kinase, putative                                              | 3.82   | 2.69   | 3.31   | 3.27   | 7.12   | 8.52    | 7.25   | 7.63   | 2.33  | 0.000128814 |
| Asa1G03816 | DPPIV_N domain-containing protein                                     | 80.86  | 100.25 | 99.93  | 93.68  | 199.27 | 223.27  | 256.71 | 226.42 | 2.42  | 0.000129018 |
| Asa5G02289 | Cytochrome P450                                                       | 1.04   | 1.44   | 1.05   | 1.18   | 3.67   | 3.82    | 3.58   | 3.69   | 3.14  | 0.000129366 |
| Asa4G02964 | Phosphoglucosamine mutase                                             | 6.22   | 6.3    | 7.58   | 6.7    | 14.19  | 17.06   | 19.32  | 16.86  | 2.52  | 0.000132732 |
| Asa1G02878 | Unknown protein                                                       | 21.34  | 12.62  | 16.53  | 16.83  | 39.14  | 42.99   | 40.38  | 40.84  | 2.43  | 0.000133623 |
| Asa4G05585 | H/ACA ribonucleoprotein complex subunit like                          | 23.05  | 17.41  | 20.75  | 20.4   | 54.63  | 88.01   | 50.73  | 64.46  | 3.16  | 0.000133682 |
| Asa7G03266 | DDT domain-containing protein                                         | 8.28   | 7.58   | 7.19   | 7.68   | 15.31  | 19.58   | 18.42  | 17.77  | 2.31  | 0.000140121 |
| Asa2G06497 | tRNA (guanine-N(7)-)-methyltransferase non-catalytic subunit          | 12.56  | 10.79  | 10.54  | 11.3   | 23.06  | 29.49   | 25.53  | 26.03  | 2.3   | 0.00014295  |
| Asa5G03804 | ATP dependent RNA helicase                                            | 57.56  | 53.21  | 55.78  | 55.52  | 111.67 | 133.69  | 130.94 | 125.43 | 2.26  | 0.000144053 |
| Asa6G05979 | Acyl-[acyl-carrier-protein] hydrolase                                 | 0.57   | 0.56   | 1.2    | 0.78   | 2.07   | 3.46    | 3      | 2.84   | 3.66  | 0.000147159 |
| Asa8G04999 | Beta-glucosidase                                                      | 1.88   | 1.54   | 1.8    | 1.74   | 5.06   | 5.89    | 3.24   | 4.73   | 2.72  | 0.000147159 |
| Asa7G02757 | Polyadenylate-binding protein                                         | 5.49   | 5.59   | 6.06   | 5.71   | 12.73  | 16.88   | 11.78  | 13.8   | 2.41  | 0.000147159 |
| Asa5G02158 | probable galactinol--sucrose galactosyltransferase 1                  | 7.21   | 10.81  | 8.59   | 8.87   | 26.99  | 38.83   | 44.27  | 36.7   | 4.14  | 0.000151482 |
| Asa0G02494 | Lectin                                                                | 63.31  | 51     | 69.52  | 61.28  | 136.48 | 145.56  | 134.36 | 138.8  | 2.27  | 0.000153999 |
| Asa5G02157 | probable galactinol--sucrose galactosyltransferase 1                  | 6.82   | 10.17  | 8.45   | 8.48   | 25.9   | 37.23   | 42.64  | 35.26  | 4.16  | 0.000156538 |
| Asa3G01596 | WD_REPEATS_REGION domain-containing protein                           | 3.27   | 3.39   | 3.51   | 3.39   | 7.68   | 8.04    | 9.45   | 8.39   | 2.47  | 0.000158101 |
| Asa5G02379 | NAC domain-containing protein                                         | 1.49   | 1.68   | 1.17   | 1.45   | 4.49   | 4.83    | 4.77   | 4.7    | 3.25  | 0.000158539 |
| Asa5G04500 | multiple organellar RNA editing factor 1, mitochondrial-like          | 35.75  | 34.46  | 34.63  | 34.95  | 69.74  | 84.71   | 84.56  | 79.67  | 2.28  | 0.000161511 |
| Asa4G06129 | DEAD-box ATP-dependent RNA helicase-like protein                      | 4.87   | 4.56   | 4.97   | 4.8    | 11.71  | 12.44   | 9.38   | 11.18  | 2.33  | 0.000163277 |
| Asa3G02617 | 30S ribosomal protein S8, putative                                    | 51.84  | 42.42  | 50.24  | 48.17  | 94.74  | 118.55  | 109.87 | 107.72 | 2.24  | 0.000163291 |
| Asa4G03432 | WD_REPEATS_REGION domain-containing protein                           | 13.68  | 13.06  | 13.51  | 13.42  | 27.89  | 34.24   | 28.11  | 30.08  | 2.24  | 0.000164753 |
| Asa3G02134 | HABP4_PAI-RBP1 domain-containing protein                              | 66.39  | 61.48  | 66.52  | 64.8   | 129.76 | 165.65  | 132.25 | 142.55 | 2.2   | 0.000167662 |
| Asa4G00967 | DUF724 domain-containing protein                                      | 0.94   | 1.03   | 1.26   | 1.08   | 2.64   | 4.86    | 3.58   | 3.69   | 3.43  | 0.000169118 |
| Asa7G03245 | Lectin                                                                | 147.7  | 93.41  | 142.78 | 127.96 | 300.65 | 332.42  | 402.74 | 345.27 | 2.7   | 0.000172082 |
| Asa2G06455 | 3-ketoacyl-CoA synthase                                               | 1.48   | 1.99   | 2.23   | 1.9    | 9.78   | 15.76   | 7.16   | 10.9   | 5.74  | 0.000173157 |
| Asa0G05766 | Rho GTPase-activating gacO-like protein                               | 2.22   | 2.51   | 1.63   | 2.12   | 8.04   | 9.45    | 4.89   | 7.46   | 3.52  | 0.000174394 |
| Asa3G02462 | Pyrophosphate--fructose 6-phosphate 1-phosphotransferase subunit beta | 1.1    | 1.15   | 1.61   | 1.29   | 3.67   | 4.42    | 3.96   | 4.02   | 3.12  | 0.000177349 |
| Asa7G02720 | Putative B3 domain-containing protein                                 | 2.42   | 2.85   | 2.63   | 2.63   | 6.44   | 8.2     | 6.38   | 7.01   | 2.66  | 0.00018103  |
| Asa0G03066 | Unknown protein                                                       | 4.22   | 5.37   | 5.57   | 5.05   | 14.01  | 18.62   | 10.37  | 14.33  | 2.84  | 0.000181741 |
| Asa5G01062 | periodic tryptophan protein 2                                         | 5.14   | 4.75   | 5.74   | 5.21   | 10.44  | 12.87   | 14.3   | 12.54  | 2.41  | 0.00018533  |
| Asa8G05935 | TauD domain-containing protein                                        | 4.43   | 5.01   | 4.25   | 4.56   | 11.36  | 12.1    | 12.07  | 11.84  | 2.6   | 0.000192831 |
| Asa8G05316 | Putative 60S ribosomal protein L14                                    | 125.82 | 111.66 | 113.38 | 116.95 | 233.62 | 269.02  | 293.51 | 265.38 | 2.27  | 0.000198014 |
| Asa5G01063 | periodic tryptophan protein 2                                         | 2.82   | 2.94   | 3.75   | 3.17   | 7.02   | 8.18    | 7.87   | 7.69   | 2.43  | 0.000204866 |
| Asa2G05714 | Heat shock 70 kDa protein                                             | 371.98 | 380.37 | 482    | 411.45 | 786.32 | 1047.67 | 848.65 | 894.21 | 2.17  | 0.000205042 |
| Asa4G02866 | Putative receptor kinase                                              | 0.94   | 1.31   | 1.58   | 1.28   | 3.1    | 3.73    | 3.63   | 3.49   | 2.73  | 0.000206222 |
| Asa7G05468 | Nuclear pore protein                                                  | 18.14  | 18.68  | 17.56  | 18.13  | 36.88  | 43.29   | 49.57  | 43.25  | 2.39  | 0.000209075 |
| Asa1G02605 | Unknown protein                                                       | 2.5    | 1.96   | 2.26   | 2.24   | 6.34   | 8.64    | 10.36  | 8.45   | 3.77  | 0.000212638 |

|            |                                                       |         |         |         |         |         |         |         |         |       |             |
|------------|-------------------------------------------------------|---------|---------|---------|---------|---------|---------|---------|---------|-------|-------------|
| Asa8G01288 | Pyrophosphate-energized vacuolar membrane proton pump | 0.17    | 0.27    | 0.21    | 0.22    | 1.58    | 1.08    | 1.06    | 1.24    | 5.72  | 0.000221849 |
| Asa2G02835 | Carboxypeptidase                                      | 0.08    | 0.02    | 0.04    | 0.05    | 0.41    | 1.31    | 0.99    | 0.9     | 19.36 | 0.000222232 |
| Asa5G02787 | BTB domain-containing protein                         | 11.61   | 10.45   | 12.71   | 11.59   | 23.79   | 27.51   | 30.32   | 27.21   | 2.35  | 0.000222789 |
| Asa0G03065 | Unknown protein                                       | 2.91    | 2.79    | 2.67    | 2.79    | 6.5     | 9.35    | 8.92    | 8.26    | 2.96  | 0.000223023 |
| Asa2G01244 | UDP-glucose 6-dehydrogenase                           | 3.55    | 4.52    | 6.2     | 4.76    | 10.84   | 12.69   | 12.41   | 11.98   | 2.52  | 0.000226261 |
| Asa1G02104 | Unknown protein                                       | 0.47    | 0.22    | 0.29    | 0.33    | 2.1     | 2.82    | 2.71    | 2.54    | 7.79  | 0.000234932 |
| Asa0G05141 | Adenosylhomocysteinase                                | 160.51  | 198.52  | 223.61  | 194.21  | 434.09  | 439.8   | 469.4   | 447.76  | 2.31  | 0.000235379 |
| Asa6G04017 | Pyruvate decarboxylase                                | 52.89   | 60.56   | 74.96   | 62.8    | 232.58  | 154.39  | 199.17  | 195.38  | 3.11  | 0.000237283 |
| Asa4G01063 | Peptidylprolyl isomerase                              | 5.09    | 3.92    | 4.57    | 4.53    | 10.22   | 16.71   | 10.41   | 12.45   | 2.75  | 0.000239878 |
| Asa7G07017 | Proliferating cell nuclear antigen                    | 6.06    | 5.38    | 6.97    | 6.14    | 16.51   | 33.2    | 25.01   | 24.91   | 4.06  | 0.000245817 |
| Asa6G05566 | Growth-regulating factor like                         | 4.33    | 4.4     | 6.57    | 5.1     | 11.2    | 14.12   | 9.49    | 11.6    | 2.28  | 0.000246808 |
| Asa4G02553 | Putative MYB transcription factor                     | 1.41    | 1.51    | 1.49    | 1.47    | 5.67    | 3.98    | 5       | 4.88    | 3.32  | 0.00024869  |
| Asa3G02914 | Geranylgeranyl pyrophosphate synthase                 | 3.3     | 3.43    | 1.9     | 2.88    | 6.97    | 10.67   | 8.93    | 8.86    | 3.08  | 0.000256913 |
| Asa3G02534 | nuclear pore complex protein NUP205                   | 3.9     | 3.57    | 3.86    | 3.78    | 7.57    | 9.83    | 7.86    | 8.42    | 2.23  | 0.000257535 |
| Asa8G05064 | Chaperone DnaK                                        | 19.1    | 16.89   | 21.5    | 19.16   | 39.85   | 48.49   | 36.47   | 41.6    | 2.17  | 0.000258003 |
| Asa1G02253 | CBS domain-containing protein CBSX5                   | 28.51   | 25.01   | 43.97   | 32.5    | 74.56   | 113.66  | 74.53   | 87.58   | 2.7   | 0.00026242  |
| Asa2G03216 | Calcium ion-binding protein                           | 29.67   | 25.9    | 28.88   | 28.15   | 53.79   | 69.22   | 62.13   | 61.71   | 2.19  | 0.000263211 |
| Asa4G04196 | FAD-binding PCMH-type domain-containing protein       | 0.65    | 0.35    | 0.79    | 0.6     | 1.5     | 2.67    | 2.39    | 2.19    | 3.66  | 0.000263211 |
| Asa6G03521 | elongation factor 2                                   | 13.09   | 12.8    | 15.58   | 13.82   | 27.51   | 38.05   | 26.76   | 30.77   | 2.23  | 0.000263999 |
| Asa4G06118 | Glutathione S-transferase                             | 128.02  | 96.13   | 109.98  | 111.38  | 249.26  | 237.27  | 259.07  | 248.53  | 2.23  | 0.000264829 |
| Asa4G03389 | Pyruvate kinase                                       | 23.08   | 22.98   | 24.36   | 23.47   | 50.27   | 59.41   | 45.42   | 51.7    | 2.2   | 0.000273407 |
| Asa1G01373 | FAD-binding PCMH-type domain-containing protein       | 26.28   | 27.51   | 31.83   | 28.54   | 57.03   | 73.21   | 57.02   | 62.42   | 2.19  | 0.000282211 |
| Asa7G00744 | Zinc finger CCCH domain-containing protein 14         | 3.67    | 3.5     | 3.4     | 3.52    | 7.88    | 10.13   | 11.65   | 9.89    | 2.81  | 0.000285135 |
| Asa7G02612 | 40S ribosomal protein SA                              | 60.52   | 60.72   | 70.08   | 63.77   | 130.8   | 165.78  | 115.51  | 137.36  | 2.15  | 0.000288086 |
| Asa7G04318 | BHLH domain-containing protein                        | 0.12    | 0.15    | 0.16    | 0.14    | 1.95    | 0.94    | 1.21    | 1.37    | 9.53  | 0.000295124 |
| Asa7G01513 | Ubiquitin-conjugating enzyme E2-binding protein       | 6.52    | 5.17    | 5.88    | 5.86    | 11.24   | 15      | 14.5    | 13.58   | 2.32  | 0.000295155 |
| Asa7G06686 | Glutathione S-transferase T1                          | 370.65  | 310.33  | 404.13  | 361.7   | 1080.49 | 1739.19 | 1949.38 | 1589.69 | 4.4   | 0.000295846 |
| Asa6G06669 | Translationally-controlled tumor protein homolog      | 1348.07 | 1192.42 | 1296.84 | 1279.11 | 2569.26 | 3160.95 | 2422.49 | 2717.57 | 2.12  | 0.000296345 |
| Asa2G01442 | Mitochondrial glycoprotein-like                       | 0.64    | 0.45    | 0.87    | 0.65    | 2.51    | 3.07    | 2.43    | 2.67    | 4.09  | 0.000300468 |
| Asa7G05860 | Polygalacturonase inhibitor                           | 8.7     | 8.03    | 13.79   | 10.17   | 22.06   | 34.19   | 23.91   | 26.72   | 2.63  | 0.000302012 |
| Asa4G04762 | nucleolar complex protein 2 homolog                   | 8.04    | 6.91    | 8.06    | 7.67    | 16.31   | 19.36   | 15.64   | 17.1    | 2.23  | 0.000306468 |
| Asa4G00950 | DUF724 domain-containing protein                      | 2.88    | 3.37    | 3.82    | 3.36    | 7.2     | 12.53   | 10.09   | 9.94    | 2.96  | 0.000307472 |
| Asa4G05568 | Peptidyl-prolyl cis-trans isomerase                   | 24.82   | 20.61   | 26.48   | 23.97   | 53.57   | 61.51   | 45.85   | 53.64   | 2.24  | 0.000308604 |
| Asa5G01565 | Lipoxygenase                                          | 7.63    | 8.19    | 12.94   | 9.59    | 22.13   | 21.59   | 24.84   | 22.85   | 2.38  | 0.000311385 |
| Asa7G05497 | T-complex protein 1 subunit gamma                     | 37.72   | 38.74   | 39.63   | 38.7    | 79.3    | 96.06   | 78.27   | 84.54   | 2.18  | 0.000315028 |
| Asa5G04225 | DUF2428 domain-containing protein                     | 0.99    | 0.91    | 0.93    | 0.94    | 2.07    | 2.93    | 1.72    | 2.24    | 2.37  | 0.00031657  |
| Asa5G05760 | stress response protein nst1-like                     | 2.19    | 2.76    | 2.51    | 2.49    | 5.94    | 6.68    | 6.27    | 6.3     | 2.53  | 0.000317037 |
| Asa6G01736 | DNA mismatch repair protein MutS                      | 0.63    | 0.59    | 0.88    | 0.7     | 1.58    | 2.86    | 2.19    | 2.21    | 3.16  | 0.000321848 |
| Asa6G02517 | Polyadenylate-binding protein                         | 103.42  | 101.42  | 104.91  | 103.25  | 193.47  | 241.32  | 246.96  | 227.25  | 2.2   | 0.000323354 |
| Asa2G06714 | Chaperonin-60 kDa protein                             | 9.46    | 8.79    | 8.09    | 8.78    | 19.04   | 21.72   | 18.92   | 19.89   | 2.27  | 0.000331159 |
| Asa3G01666 | GATA-type domain-containing protein                   | 34.59   | 40.1    | 36.05   | 36.91   | 106.24  | 108.56  | 65.07   | 93.29   | 2.53  | 0.000333732 |
| Asa0G04963 | Non-symbiotic hemoglobin, putative                    | 91.58   | 75.83   | 71.68   | 79.7    | 204.04  | 230.98  | 294.55  | 243.19  | 3.05  | 0.000338038 |
| Asa2G06683 | GTP-binding nuclear protein                           | 83.29   | 91.52   | 93.49   | 89.43   | 174.52  | 229.1   | 178.57  | 194.06  | 2.17  | 0.000338941 |
| Asa8G01220 | endoribonuclease Dicer homolog 3                      | 2.93    | 2.63    | 3.15    | 2.9     | 6.13    | 7.15    | 6.32    | 6.53    | 2.25  | 0.00036195  |

|            |                                                                   |        |        |        |        |        |        |        |        |        |             |
|------------|-------------------------------------------------------------------|--------|--------|--------|--------|--------|--------|--------|--------|--------|-------------|
| Asa6G06094 | Protein arginine N-methyltransferase                              | 5.08   | 3.86   | 4.61   | 4.52   | 9.31   | 11.5   | 11.76  | 10.86  | 2.4    | 0.000364579 |
| Asa5G03871 | Putative origin recognition complex subunit 3                     | 0.63   | 0.64   | 0.85   | 0.71   | 1.63   | 2.65   | 1.77   | 2.02   | 2.85   | 0.000365899 |
| Asa7G05470 | Nuclear pore protein                                              | 18.61  | 20.43  | 17.61  | 18.88  | 37.57  | 44.87  | 48.26  | 43.57  | 2.31   | 0.000367515 |
| Asa3G04835 | Protein CLP1 homolog                                              | 0.56   | 0.42   | 0.52   | 0.5    | 2.28   | 2      | 2.42   | 2.23   | 4.47   | 0.000367515 |
| Asa0G02463 | Aspartate carbamoyltransferase, chloroplastic                     | 1.76   | 2.53   | 2.28   | 2.19   | 5.46   | 9.51   | 8.85   | 7.94   | 3.63   | 0.000369683 |
| Asa5G03149 | HTH OST-type domain-containing protein                            | 2.41   | 2.21   | 2.81   | 2.48   | 5.89   | 7.46   | 4.27   | 5.87   | 2.37   | 0.000371454 |
| Asa2G03438 | WD_REPEATS_REGION domain-containing protein                       | 6.15   | 5.24   | 7.21   | 6.2    | 12.13  | 15.71  | 14.53  | 14.12  | 2.28   | 0.000374725 |
| Asa7G00941 | Glycosyltransferase                                               | 0.51   | 0.67   | 0.65   | 0.61   | 2.24   | 2.44   | 1.79   | 2.16   | 3.54   | 0.000374823 |
| Asa6G03625 | X8 domain-containing protein                                      | 3.1    | 3.74   | 4.26   | 3.7    | 16.83  | 30.35  | 36.11  | 27.76  | 7.5    | 0.000380014 |
| Asa4G01864 | Unknown protein                                                   | 169.89 | 148.24 | 159.25 | 159.13 | 371.73 | 358    | 344.86 | 358.2  | 2.25   | 0.000382296 |
| Asa0G00994 | 4-hydroxy-3-methylbut-2-en-1-yl diphosphate synthase              | 0.33   | 0.46   | 0.43   | 0.41   | 1.29   | 2.71   | 2.32   | 2.11   | 5.18   | 0.000382296 |
| Asa0G00313 | Pentatricopeptide repeat-containing protein                       | 2.7    | 2.35   | 2.57   | 2.54   | 5.81   | 6.87   | 5.64   | 6.11   | 2.4    | 0.000396348 |
| Asa6G03048 | Oxysterol-binding protein, PH domain-like protein                 | 4.13   | 4.47   | 5.85   | 4.82   | 9.88   | 13.47  | 9.8    | 11.05  | 2.29   | 0.000399756 |
| Asa4G03885 | ABC transporter-like protein                                      | 0.06   | 0.01   | 0.02   | 0.03   | 0.27   | 0.87   | 0.57   | 0.57   | 19     | 0.00040659  |
| Asa1G03050 | Ribosome biogenesis protein BOP1 homolog                          | 18.58  | 18.11  | 19.1   | 18.6   | 41.17  | 55.64  | 62.7   | 53.17  | 2.86   | 0.00041221  |
| Asa2G07511 | Putative pre-mRNA-splicing factor ATP-dependent RNA helicase      | 20.28  | 21.45  | 21.6   | 21.11  | 40.83  | 55.99  | 58.67  | 51.83  | 2.46   | 0.00041221  |
| Asa5G05037 | D-aminoacyl-tRNA deacylase                                        | 28.47  | 32.84  | 39.23  | 33.51  | 80.73  | 77.1   | 70.17  | 76     | 2.27   | 0.000414814 |
| Asa7G01215 | Exostosin domain-containing protein                               | 2.97   | 3.19   | 3.79   | 3.32   | 9.93   | 16.89  | 9.14   | 11.99  | 3.61   | 0.000425346 |
| Asa8G02565 | DUF632 domain-containing protein/DUF630 domain-containing protein | 3.58   | 4.7    | 3.94   | 4.07   | 8.06   | 12.36  | 9.18   | 9.87   | 2.42   | 0.00043458  |
| Asa7G04808 | TPR_REGION domain-containing protein                              | 77.2   | 75.54  | 82.89  | 78.54  | 143.22 | 181.22 | 188.46 | 170.97 | 2.18   | 0.000437384 |
| Asa4G05700 | DNA-damage-repair/toleration protein                              | 2.68   | 4      | 4.73   | 3.8    | 16.08  | 11.41  | 17.69  | 15.06  | 3.96   | 0.000451176 |
| Asa5G03730 | PI3K/PI4K domain-containing protein                               | 16.37  | 15.42  | 17.09  | 16.29  | 32.92  | 40.15  | 32.71  | 35.26  | 2.16   | 0.00045253  |
| Asa6G04111 | Cationic amino acid transporter                                   | 8.7    | 7.03   | 8.52   | 8.08   | 18.6   | 21.32  | 26.42  | 22.11  | 2.74   | 0.000454734 |
| Asa5G03879 | Tocopherol methyltransferase                                      | 18.29  | 24.66  | 21.73  | 21.56  | 47.87  | 48.47  | 57.13  | 51.16  | 2.37   | 0.000456031 |
| Asa6G00037 | Kinase                                                            | 17.55  | 15.97  | 20.61  | 18.04  | 32.65  | 44.18  | 38.43  | 38.42  | 2.13   | 0.000460207 |
| Asa7G07597 | Sodium/hydrogen exchanger 7                                       | 4.42   | 6.27   | 6.88   | 5.86   | 16.88  | 18.58  | 10.86  | 15.44  | 2.64   | 0.000463914 |
| Asa7G03095 | COP1-interacting protein 7-like isoform X2                        | 22.4   | 19.87  | 21.88  | 21.38  | 43.34  | 49.11  | 52.45  | 48.3   | 2.26   | 0.000471484 |
| Asa2G03604 | WD_REPEATS_REGION domain-containing protein                       | 1.57   | 1.39   | 1.7    | 1.55   | 3.99   | 5.12   | 2.79   | 3.97   | 2.55   | 0.000479934 |
| Asa1G00799 | Homeobox-leucine zipper protein                                   | 9      | 7.52   | 9.34   | 8.62   | 16.44  | 21.45  | 17.76  | 18.55  | 2.15   | 0.000482892 |
| Asa7G03692 | Reductase                                                         | 0      | 0.03   | 0.08   | 0.04   | 1.38   | 12.86  | 13.25  | 9.16   | 249.91 | 0.00048442  |
| Asa1G00901 | SANT domain-containing protein                                    | 1.71   | 2.12   | 2.21   | 2.01   | 6.23   | 6.18   | 5.02   | 5.81   | 2.89   | 0.000485896 |
| Asa8G04311 | Putative prolyl 4-hydroxylase 1                                   | 26.54  | 22.96  | 24.74  | 24.75  | 62.01  | 54.49  | 50.92  | 55.81  | 2.26   | 0.000494538 |
| Asa6G05495 | Rho GTPase-activating gacO-like protein                           | 2.41   | 2.67   | 2.27   | 2.45   | 8.73   | 10.35  | 5.11   | 8.06   | 3.29   | 0.000500379 |
| Asa7G01127 | Pectin lyase-like superfamily protein                             | 0.12   | 0.27   | 0.82   | 0.4    | 3.54   | 10.74  | 6.13   | 6.8    | 16.87  | 0.000501481 |
| Asa1G02393 | AP2/ERF domain-containing transcription factor                    | 3.45   | 1.9    | 5.51   | 3.62   | 10.83  | 9.68   | 9.51   | 10.01  | 2.76   | 0.000506107 |
| Asa4G03528 | UPF0481 protein                                                   | 0.27   | 0.13   | 0.19   | 0.2    | 0.78   | 0.92   | 1.26   | 0.99   | 5.02   | 0.000506206 |
| Asa3G02335 | Mechanosensitive ion channel protein                              | 0.29   | 0.28   | 0.24   | 0.27   | 1.54   | 4.03   | 4.07   | 3.21   | 11.9   | 0.000525565 |
| Asa2G06763 | Putative heavy metal-associated domain, HMA                       | 29.28  | 24.11  | 36.93  | 30.11  | 64.29  | 67.68  | 71.24  | 67.74  | 2.25   | 0.000525565 |
| Asa2G00917 | F-box domain-containing protein                                   | 6.64   | 4.76   | 6.21   | 5.87   | 12.66  | 17.5   | 12.99  | 14.38  | 2.45   | 0.000526047 |
| Asa5G00900 | Homeobox domain-containing protein/DDT domain-containing protein  | 8.12   | 6.9    | 7.38   | 7.47   | 14.5   | 16.61  | 18.63  | 16.58  | 2.22   | 0.000528221 |
| Asa5G03803 | ATP dependent RNA helicase                                        | 47.08  | 47.87  | 53.43  | 49.46  | 102.92 | 116.44 | 105.28 | 108.21 | 2.19   | 0.000528419 |



|            |                                                             |        |        |        |        |         |         |         |         |        |             |
|------------|-------------------------------------------------------------|--------|--------|--------|--------|---------|---------|---------|---------|--------|-------------|
| Asa0G03894 | Nop domain-containing protein                               | 39.06  | 38.98  | 39.04  | 39.03  | 71.03   | 97.53   | 100.26  | 89.61   | 2.3    | 0.000544974 |
| Asa6G04545 | 4-coumarate--CoA ligase-like 4                              | 91.75  | 91.59  | 105.59 | 96.31  | 230.85  | 189.61  | 246.47  | 222.31  | 2.31   | 0.000547355 |
| Asa7G00506 | 65-kDa microtubule-associated protein 1                     | 15.17  | 15.23  | 18.95  | 16.45  | 36.86   | 62.64   | 59.94   | 53.15   | 3.23   | 0.000547557 |
| Asa7G03393 | E3 ubiquitin-protein ligase ORTHRUS 2                       | 3.25   | 2.92   | 3.62   | 3.26   | 7.08    | 11.28   | 6.85    | 8.4     | 2.58   | 0.000550948 |
| Asa6G04429 | C2H2-type domain-containing protein                         | 3.8    | 2.8    | 3.37   | 3.32   | 8.92    | 15.98   | 9.11    | 11.34   | 3.41   | 0.000554387 |
| Asa0G04784 | GD5L esterase/lipase                                        | 0.74   | 1.26   | 1.7    | 1.23   | 4.06    | 3.42    | 3.09    | 3.52    | 2.86   | 0.00056497  |
| Asa5G03727 | PI3K/PI4K domain-containing protein                         | 16.26  | 15.35  | 16.69  | 16.1   | 32.14   | 39.53   | 31.77   | 34.48   | 2.14   | 0.000567024 |
| Asa4G05084 | PREDICTED: polyribonucleotide nucleotidyltransferase        | 2.2    | 1.99   | 2.41   | 2.2    | 5.51    | 7.14    | 8.69    | 7.11    | 3.23   | 0.000568263 |
| Asa2G03104 | Calcium ion-binding protein                                 | 25.87  | 23.03  | 26.24  | 25.05  | 43.19   | 60.42   | 55.17   | 52.93   | 2.11   | 0.000572069 |
| Asa7G04807 | TPR_REGION domain-containing protein                        | 62.78  | 60.31  | 66.15  | 63.08  | 111.81  | 148.79  | 142.48  | 134.36  | 2.13   | 0.000575809 |
| Asa2G06744 | BTB/POZ domain-containing protein                           | 0.13   | 0.12   | 0.15   | 0.13   | 0.53    | 0.82    | 0.88    | 0.74    | 5.58   | 0.000578579 |
| Asa4G02163 | Transmembrane protein                                       | 0.18   | 0.98   | 1.16   | 0.77   | 3.44    | 5.67    | 2.9     | 4       | 5.18   | 0.000581664 |
| Asa4G00986 | Unknown protein                                             | 11.83  | 10.93  | 14.85  | 12.54  | 35.7    | 58.33   | 31.11   | 41.71   | 3.33   | 0.000583629 |
| Asa1G03049 | Ribosome biogenesis protein BOP1 homolog                    | 20.71  | 19.24  | 21.05  | 20.33  | 39.5    | 52.23   | 41.8    | 44.51   | 2.19   | 0.000584153 |
| Asa6G01461 | Putative DNA primase large subunit                          | 5.06   | 5.16   | 5.19   | 5.14   | 9.02    | 13.93   | 12.18   | 11.71   | 2.28   | 0.000604382 |
| Asa3G01975 | Putative RNA-binding protein                                | 85.91  | 84.83  | 90.56  | 87.1   | 145.83  | 211.13  | 197.34  | 184.77  | 2.12   | 0.000607151 |
| Asa4G02937 | nuclear speckle RNA-binding protein B-like                  | 0.65   | 0.25   | 0.56   | 0.49   | 2.52    | 4.72    | 5.92    | 4.39    | 9.01   | 0.000617751 |
| Asa8G04001 | GD5L esterase/lipase                                        | 10.29  | 3.39   | 6.2    | 6.63   | 20.08   | 20.25   | 13.91   | 18.08   | 2.73   | 0.00062333  |
| Asa8G05472 | ATP-dependent RNA helicase                                  | 25.83  | 21.44  | 22.32  | 23.2   | 43.12   | 52.77   | 52.99   | 49.63   | 2.14   | 0.00062623  |
| Asa6G00435 | probable histone acetyltransferase type B catalytic subunit | 10.71  | 8.1    | 9.66   | 9.49   | 19.91   | 24.19   | 16.31   | 20.14   | 2.12   | 0.00063255  |
| Asa8G03001 | Chaperone DnaK                                              | 1.82   | 2.19   | 1.51   | 1.84   | 5.25    | 6.52    | 6.57    | 6.11    | 3.32   | 0.000638055 |
| Asa5G03479 | Glutamyl-tRNA(Gln) amidotransferase subunit A               | 1.84   | 1.51   | 1.61   | 1.65   | 3.73    | 4.26    | 4.72    | 4.24    | 2.56   | 0.000643414 |
| Asa3G02955 | T-complex protein 1 subunit alpha                           | 40.69  | 43.47  | 44.39  | 42.85  | 88.3    | 99.66   | 89.74   | 92.57   | 2.16   | 0.000649278 |
| Asa0G04940 | probable histone acetyltransferase type B catalytic subunit | 8.06   | 6.46   | 7.59   | 7.37   | 15.57   | 19.78   | 12.68   | 16.01   | 2.17   | 0.000650549 |
| Asa7G00380 | Receptor-like serine/threonine-protein kinase               | 3.02   | 2.47   | 3.18   | 2.89   | 5.4     | 6.97    | 7.48    | 6.62    | 2.29   | 0.000650549 |
| Asa8G04206 | ATP-dependent RNA helicase                                  | 2.2    | 1.85   | 2.42   | 2.16   | 3.86    | 5.69    | 4.89    | 4.81    | 2.23   | 0.000661375 |
| Asa4G01436 | Fatty acid hydroxylase domain-containing protein            | 0      | 0.03   | 0.04   | 0.02   | 1.07    | 1.35    | 2.74    | 1.72    | 73.71  | 0.000661405 |
| Asa2G03214 | AWPM-19-like protein                                        | 0      | 0.09   | 0.06   | 0.05   | 1.02    | 0.9     | 1.7     | 1.21    | 24.13  | 0.000665838 |
| Asa2G05716 | 70 kDa heat shock protein                                   | 651.73 | 616.66 | 785.64 | 684.68 | 1347.59 | 1689.62 | 1176.17 | 1404.46 | 2.05   | 0.000674086 |
| Asa5G01298 | HMA domain-containing protein                               | 0.06   | 0.1    | 0.22   | 0.13   | 4.23    | 5.49    | 1.25    | 3.66    | 28.87  | 0.000674086 |
| Asa7G04672 | Unknown protein                                             | 2.84   | 2.51   | 3.2    | 2.85   | 7.05    | 14.18   | 9.7     | 10.31   | 3.62   | 0.000681182 |
| Asa7G02866 | Receptor-like protein kinase                                | 23.45  | 25.29  | 32.33  | 27.02  | 54.16   | 62.26   | 57.91   | 58.11   | 2.15   | 0.000682862 |
| Asa6G05455 | Pyrophosphate-energized vacuolar membrane proton pump       | 40.94  | 39.15  | 50.58  | 43.56  | 84.38   | 102.9   | 86.72   | 91.33   | 2.1    | 0.000688514 |
| Asa8G05969 | Kinesin-like protein                                        | 2.34   | 1.96   | 2.24   | 2.18   | 4.52    | 5.47    | 4.87    | 4.95    | 2.27   | 0.000700047 |
| Asa2G00184 | Pesticidal crystal cry8Ba protein                           | 1.25   | 1.2    | 1.28   | 1.24   | 2.3     | 3.36    | 3.37    | 3.01    | 2.42   | 0.000705414 |
| Asa6G05004 | Unknown protein                                             | 14.41  | 10.66  | 10.44  | 11.84  | 26.77   | 27.49   | 34.76   | 29.67   | 2.51   | 0.000707941 |
| Asa8G05531 | Beta-galactosidase                                          | 2.03   | 1.8    | 2.07   | 1.97   | 4.18    | 7.67    | 6.63    | 6.16    | 3.13   | 0.000722446 |
| Asa1G01838 | Aa_trans domain-containing protein                          | 0.04   | 0.02   | 0      | 0.02   | 0.78    | 5.09    | 2.78    | 2.88    | 144.17 | 0.000729443 |
| Asa6G06120 | GD5L esterase/lipase                                        | 0.68   | 0.09   | 0.4    | 0.39   | 1.26    | 2.93    | 2.39    | 2.19    | 5.62   | 0.000731718 |
| Asa8G03574 | Protein yippee-like                                         | 23.45  | 22.68  | 28.6   | 24.91  | 53.55   | 59.85   | 55.72   | 56.37   | 2.26   | 0.000733469 |
| Asa0G04541 | LRRNT_2 domain-containing protein                           | 1.83   | 2.47   | 3.13   | 2.48   | 7.26    | 6.69    | 6.36    | 6.77    | 2.73   | 0.000737637 |
| Asa7G02600 | Phospholipase A2 family protein                             | 5.15   | 6.52   | 9.56   | 7.08   | 27.25   | 47.6    | 23.16   | 32.67   | 4.62   | 0.000742925 |
| Asa4G02314 | SAP30_Sin3_bdg domain-containing protein                    | 3.53   | 4.7    | 5.28   | 4.5    | 9.27    | 16      | 12.94   | 12.74   | 2.83   | 0.000782089 |

|            |                                                                |        |        |        |        |        |        |        |        |       |             |
|------------|----------------------------------------------------------------|--------|--------|--------|--------|--------|--------|--------|--------|-------|-------------|
| Asa7G06642 | Structural maintenance of chromosomes protein                  | 2.41   | 2.96   | 3.35   | 2.91   | 6.24   | 10.39  | 6.73   | 7.79   | 2.68  | 0.000795707 |
| Asa0G03473 | UPF0481 protein                                                | 1.2    | 1      | 1.11   | 1.1    | 2.69   | 5.09   | 4.81   | 4.2    | 3.8   | 0.00080966  |
| Asa8G01370 | Peptidylprolyl isomerase                                       | 2.2    | 2.02   | 3.06   | 2.43   | 4.85   | 7.26   | 5.02   | 5.71   | 2.35  | 0.000810019 |
| Asa5G02459 | Rotundifolia-like protein                                      | 0.36   | 0.77   | 0.37   | 0.5    | 2.25   | 4.18   | 3.77   | 3.4    | 6.8   | 0.000814421 |
| Asa7G06863 | Unknown protein                                                | 0.92   | 0.76   | 1.31   | 1      | 5.4    | 4.64   | 5.23   | 5.09   | 5.11  | 0.000820198 |
| Asa6G01272 | Chaperone DnaK                                                 | 67.78  | 67.22  | 80.36  | 71.79  | 145.19 | 173.96 | 132.03 | 150.39 | 2.1   | 0.000820264 |
| Asa5G01546 | GATA transcription factor                                      | 2.66   | 2.72   | 2.45   | 2.61   | 7.5    | 8.5    | 5.66   | 7.22   | 2.77  | 0.000826932 |
| Asa3G01858 | Epimerase domain-containing protein                            | 3.69   | 3.38   | 3.94   | 3.67   | 9.02   | 9.4    | 8.87   | 9.1    | 2.48  | 0.000836276 |
| Asa5G01004 | Protein translation factor SUI1 homolog                        | 145.49 | 157.91 | 169.33 | 157.58 | 309.57 | 355.17 | 357.38 | 340.71 | 2.16  | 0.000837249 |
| Asa8G03702 | C2 domain-containing protein                                   | 0.48   | 0.14   | 0.43   | 0.35   | 2.19   | 2.86   | 1.15   | 2.07   | 5.9   | 0.000851932 |
| Asa0G01801 | GTP diphosphokinase                                            | 0.54   | 0.5    | 0.38   | 0.47   | 1.62   | 1.65   | 1.75   | 1.67   | 3.54  | 0.000852091 |
| Asa7G06325 | 60S ribosomal protein L5                                       | 43.94  | 36.9   | 43.75  | 41.53  | 93.77  | 88.34  | 85.83  | 89.31  | 2.15  | 0.000887762 |
| Asa5G00377 | Putative transcription factor MYB family                       | 16.72  | 17.88  | 17.51  | 17.37  | 39.31  | 55.73  | 62.93  | 52.66  | 3.03  | 0.000891146 |
| Asa4G06315 | Timeless protein                                               | 0.79   | 0.76   | 0.79   | 0.78   | 1.61   | 2.75   | 1.75   | 2.04   | 2.61  | 0.000893754 |
| Asa4G01261 | Putative heavy metal-associated domain, HMA                    | 1.5    | 1.04   | 2.3    | 1.61   | 6.89   | 8.56   | 3.96   | 6.47   | 4.01  | 0.000901595 |
| Asa7G07041 | target of early activation tagged (EAT) 3                      | 0.27   | 0.62   | 0.93   | 0.61   | 2.84   | 4.5    | 4.36   | 3.9    | 6.43  | 0.000902095 |
| Asa6G04538 | WD_REPEATS_REGION domain-containing protein                    | 9.56   | 8.12   | 7.86   | 8.51   | 16.39  | 20.02  | 18.43  | 18.28  | 2.15  | 0.000903303 |
| Asa6G00328 | Putative disease resistance protein                            | 1.12   | 1.21   | 1.11   | 1.15   | 4.59   | 8.55   | 4.06   | 5.73   | 5     | 0.000909881 |
| Asa5G05890 | Serine/threonine-protein phosphatase 4 regulatory subunit like | 6      | 5.5    | 5.8    | 5.77   | 11.04  | 14.1   | 12.41  | 12.52  | 2.17  | 0.000926191 |
| Asa8G03922 | protein kinase family protein                                  | 2.18   | 2.22   | 2.55   | 2.32   | 4.15   | 6.26   | 4.49   | 4.97   | 2.14  | 0.000926287 |
| Asa1G01554 | Telomere repeat-binding protein 5-like                         | 1.7    | 2.91   | 3.13   | 2.58   | 11.72  | 9.88   | 16.19  | 12.6   | 4.88  | 0.000929139 |
| Asa3G04713 | Methionine aminopeptidase 2-1                                  | 71.14  | 70.57  | 70.8   | 70.84  | 129.34 | 160.42 | 159.13 | 149.63 | 2.11  | 0.000929139 |
| Asa3G00009 | AB hydrolase-1 domain-containing protein                       | 1.35   | 1.03   | 1.62   | 1.33   | 2.73   | 4.45   | 3.01   | 3.4    | 2.55  | 0.000929139 |
| Asa2G02076 | Fatty acid hydroxylase domain-containing protein               | 0.32   | 0.23   | 0.37   | 0.31   | 1.89   | 6.37   | 5.1    | 4.45   | 14.52 | 0.000931669 |
| Asa3G00892 | AB hydrolase-1 domain-containing protein                       | 1.32   | 1.17   | 1.77   | 1.42   | 2.94   | 4.7    | 3.21   | 3.62   | 2.55  | 0.000938126 |
| Asa8G03279 | Hydrolase_4 domain-containing protein                          | 0.72   | 0.46   | 0.64   | 0.61   | 1.88   | 2.09   | 2.68   | 2.22   | 3.65  | 0.000940665 |
| Asa6G00241 | Chaperone clpb                                                 | 7.77   | 7.15   | 7.56   | 7.49   | 16.72  | 15.93  | 16.86  | 16.5   | 2.2   | 0.000956625 |
| Asa7G05085 | Kinetochore spc25                                              | 2.01   | 1.72   | 2.32   | 2.02   | 5.33   | 6.11   | 4.84   | 5.43   | 2.69  | 0.000964733 |
| Asa7G01077 | Isopimaradiene synthase                                        | 0.16   | 0.14   | 0.25   | 0.18   | 0.88   | 0.78   | 0.69   | 0.78   | 4.27  | 0.000969617 |
| Asa3G00155 | Eukaryotic peptide chain release factor subunit 1-1            | 33.35  | 37.87  | 35.75  | 35.66  | 81.61  | 84.16  | 62.63  | 76.13  | 2.14  | 0.000976447 |
| Asa3G02933 | protein ECERIFERUM 3-like                                      | 1.77   | 0.45   | 1.29   | 1.17   | 3.73   | 7.63   | 4.3    | 5.22   | 4.46  | 0.000983789 |
| Asa3G04896 | Receptor-like protein kinase                                   | 2.49   | 2.02   | 2.47   | 2.33   | 4.71   | 8.77   | 7.06   | 6.85   | 2.94  | 0.000983789 |
| Asa1G04083 | Unknown protein                                                | 15.66  | 12.16  | 11.46  | 13.09  | 31.15  | 27.97  | 34.09  | 31.07  | 2.37  | 0.001000231 |
| Asa6G01547 | Seed biotin-containing protein SBP65                           | 1.44   | 1.63   | 1.38   | 1.48   | 4.04   | 4.17   | 5.7    | 4.64   | 3.13  | 0.001007478 |
| Asa5G03631 | Plant cysteine oxidase 2                                       | 58.39  | 56.85  | 64.15  | 59.8   | 122.05 | 131.05 | 129.42 | 127.51 | 2.13  | 0.001008915 |
| Asa5G01772 | Oxygen-dependent choline dehydrogenase                         | 1.72   | 1.97   | 2.58   | 2.09   | 11.66  | 38.55  | 33.03  | 27.75  | 13.28 | 0.001012572 |
| Asa8G02259 | SAM_MT_RSMB_NOP domain-containing protein                      | 20.17  | 20.39  | 20.04  | 20.2   | 36.45  | 47.69  | 42.62  | 42.25  | 2.09  | 0.001046586 |
| Asa3G00826 | exosome complex component RRP45A-like                          | 6.81   | 6.16   | 6.55   | 6.51   | 12.83  | 16.89  | 12.52  | 14.08  | 2.16  | 0.001048242 |
| Asa2G05409 | Protein kinase-like protein                                    | 12.6   | 10.5   | 11.16  | 11.42  | 22.12  | 27.26  | 22.61  | 24     | 2.1   | 0.001073522 |
| Asa6G06873 | SHSP domain-containing protein                                 | 73.43  | 60.38  | 83.98  | 72.6   | 128.82 | 191.07 | 129.32 | 149.74 | 2.06  | 0.001078343 |
| Asa6G03911 | Elongation factor G 2                                          | 9.24   | 10.13  | 10.87  | 10.08  | 18.22  | 24.56  | 22.26  | 21.68  | 2.15  | 0.001081256 |
| Asa5G03630 | Plant cysteine oxidase 2                                       | 71.64  | 70.1   | 77.73  | 73.16  | 149.6  | 158.78 | 159.89 | 156.09 | 2.13  | 0.001087191 |
| Asa7G03462 | Putative transcription factor bHLH family                      | 1.53   | 1.3    | 1.21   | 1.35   | 3.38   | 6.2    | 6.26   | 5.28   | 3.92  | 0.001102593 |

|            |                                                               |       |        |        |        |        |        |        |        |        |             |
|------------|---------------------------------------------------------------|-------|--------|--------|--------|--------|--------|--------|--------|--------|-------------|
| Asa5G03254 | Histone-lysine N-methyltransferase                            | 3.21  | 3.11   | 3.21   | 3.18   | 5.96   | 8.1    | 7.27   | 7.11   | 2.24   | 0.001129143 |
| Asa8G01305 | DUF642 domain-containing protein                              | 0     | 0.06   | 0.13   | 0.06   | 0.66   | 1.25   | 1.8    | 1.24   | 19.53  | 0.001168875 |
| Asa8G05022 | Mitochondrial glycoprotein family protein, putative           | 5.94  | 5.29   | 5.77   | 5.67   | 12.34  | 14.71  | 13.49  | 13.51  | 2.38   | 0.001174879 |
| Asa7G04304 | MADS-box transcription factor                                 | 0.35  | 0.73   | 0.51   | 0.53   | 1.85   | 3.42   | 1.83   | 2.37   | 4.47   | 0.00117685  |
| Asa7G00537 | Kinesin-like protein                                          | 2.49  | 1.8    | 2.45   | 2.25   | 4.46   | 6.54   | 3.97   | 4.99   | 2.22   | 0.001186454 |
| Asa5G05593 | Cytochrome P450 family protein, expressed                     | 7.04  | 2.65   | 5.79   | 5.16   | 15.25  | 21.47  | 11.07  | 15.93  | 3.09   | 0.001191288 |
| Asa8G06137 | PPDK_N domain-containing protein                              | 4.45  | 4.17   | 4.53   | 4.38   | 8.12   | 10.74  | 8.81   | 9.22   | 2.1    | 0.001213572 |
| Asa6G07048 | SHSP domain-containing protein                                | 79.07 | 60.33  | 78.67  | 72.69  | 146.86 | 194.27 | 115.89 | 152.34 | 2.1    | 0.001224031 |
| Asa4G02122 | Dead box ATP-dependent RNA helicase, putative                 | 2.56  | 2.34   | 2.46   | 2.45   | 4.86   | 6.15   | 5.69   | 5.57   | 2.27   | 0.001238931 |
| Asa2G03679 | U3 small nucleolar ribonucleoprotein protein MPP10            | 26.05 | 25.34  | 25.08  | 25.49  | 46.84  | 56.93  | 57.17  | 53.65  | 2.1    | 0.001255908 |
| Asa4G02936 | VQ domain-containing protein                                  | 2.13  | 0.71   | 0.58   | 1.14   | 3.16   | 4.67   | 4.95   | 4.26   | 3.74   | 0.001277488 |
| Asa1G00229 | Putative transcription factor                                 | 13.99 | 13.1   | 13.59  | 13.56  | 27.66  | 31.25  | 29.84  | 29.58  | 2.18   | 0.001293309 |
| Asa1G01625 | FAS1 domain-containing protein                                | 0.52  | 0.56   | 0.82   | 0.63   | 1.85   | 2.05   | 1.42   | 1.77   | 2.8    | 0.001301104 |
| Asa1G01627 | Pollen Ole e 1 allergen and extensin family protein, putative | 0.08  | 0.04   | 0.17   | 0.1    | 1.7    | 25.9   | 24.7   | 17.43  | 180.34 | 0.001309586 |
| Asa0G03251 | replication protein A 32 kDa subunit A-like                   | 1.57  | 1.17   | 2.34   | 1.69   | 6.78   | 14.3   | 7.12   | 9.4    | 5.55   | 0.00131871  |
| Asa3G03680 | Beta-glucosidase                                              | 5.64  | 7.41   | 7.42   | 6.82   | 17.52  | 34.99  | 32.22  | 28.24  | 4.14   | 0.001327817 |
| Asa3G02130 | Remorin_C domain-containing protein                           | 4.62  | 4.6    | 5.12   | 4.78   | 8.85   | 12.94  | 9.38   | 10.39  | 2.17   | 0.00135076  |
| Asa1G00249 | Peptidylprolyl isomerase                                      | 7.68  | 6.65   | 7.2    | 7.18   | 15.08  | 17.86  | 11.86  | 14.93  | 2.08   | 0.001351032 |
| Asa8G00805 | Putative Aldehyde dehydrogenase                               | 10.97 | 8.8    | 10.51  | 10.09  | 19.2   | 23.68  | 19.71  | 20.86  | 2.07   | 0.001360525 |
| Asa7G05821 | Flap endonuclease 1                                           | 17.79 | 13.97  | 15.51  | 15.76  | 27.23  | 36.26  | 34.53  | 32.67  | 2.07   | 0.001365666 |
| Asa7G06919 | Fructose-bisphosphate aldolase                                | 127.4 | 132.81 | 154.74 | 138.32 | 287.33 | 295.23 | 292.29 | 291.62 | 2.11   | 0.001376331 |
| Asa3G03166 | L-ascorbate oxidase                                           | 0     | 0      | 0      | 0      | 0.64   | 9.36   | 5.57   | 5.19   | 519    | 0.001376607 |
| Asa0G00595 | U6 small nuclear RNA (adenine-(43)-N(6))-methyltransferase    | 5     | 3.49   | 4.24   | 4.24   | 9.53   | 10.19  | 13.1   | 10.94  | 2.58   | 0.001397027 |
| Asa7G02712 | VOC domain-containing protein                                 | 43.1  | 44.05  | 35.53  | 40.89  | 81.55  | 92.74  | 90.13  | 88.14  | 2.16   | 0.001406048 |
| Asa7G04276 | F-box family protein                                          | 0.37  | 0.24   | 0.35   | 0.32   | 1.49   | 1.6    | 1.66   | 1.58   | 4.95   | 0.001406048 |
| Asa1G00699 | BP28CT domain-containing protein                              | 5.59  | 5.45   | 5.94   | 5.66   | 10.73  | 13.66  | 10.18  | 11.52  | 2.04   | 0.001431923 |
| Asa6G02190 | Thioredoxin domain-containing protein                         | 0.1   | 0.04   | 0      | 0.05   | 3.79   | 1      | 1.97   | 2.25   | 48.29  | 0.001437463 |
| Asa5G05240 | Unknown protein                                               | 6.66  | 5.14   | 4.21   | 5.34   | 11.29  | 14.84  | 13.84  | 13.32  | 2.5    | 0.001445199 |
| Asa1G03132 | Protein IQ-DOMAIN like                                        | 4.49  | 5.6    | 5.56   | 5.22   | 11.15  | 12.22  | 14.11  | 12.49  | 2.39   | 0.001456968 |
| Asa4G04605 | G domain-containing protein                                   | 1.08  | 1.35   | 1.56   | 1.33   | 3.26   | 4.06   | 4.03   | 3.78   | 2.84   | 0.001481291 |
| Asa8G03989 | Unknown protein                                               | 1.6   | 0.79   | 1.09   | 1.16   | 3.33   | 3.81   | 3.9    | 3.68   | 3.17   | 0.001492137 |
| Asa2G00178 | protein JASON                                                 | 0.15  | 0.04   | 0.06   | 0.08   | 0.5    | 1.72   | 1.59   | 1.27   | 15.24  | 0.001496131 |
| Asa5G05973 | ALOG domain-containing protein                                | 0.07  | 0      | 0.05   | 0.04   | 0.89   | 17.93  | 12.25  | 10.36  | 258.92 | 0.001523677 |
| Asa7G03820 | C2H2-type domain-containing protein                           | 1.6   | 1.36   | 1.09   | 1.35   | 4.12   | 7.75   | 4.03   | 5.3    | 3.93   | 0.001547844 |
| Asa6G00665 | protein kinase family protein                                 | 0.19  | 0.13   | 0.37   | 0.23   | 1.15   | 1.16   | 1      | 1.1    | 4.8    | 0.001551651 |
| Asa6G02038 | Glucan endo-1,3-beta-glucosidase                              | 0.76  | 0.41   | 0.25   | 0.47   | 2.64   | 1.57   | 2.75   | 2.32   | 4.9    | 0.001560745 |
| Asa4G00339 | WD_REPEATS_REGION domain-containing protein                   | 7.52  | 7.98   | 8.46   | 7.99   | 16.18  | 19.36  | 23.05  | 19.53  | 2.45   | 0.001575303 |
| Asa2G01106 | Ethylene-responsive transcription factor                      | 3.41  | 3.82   | 5.27   | 4.17   | 10.86  | 10.97  | 10.19  | 10.67  | 2.56   | 0.001583341 |
| Asa6G03633 | Transcription elongation factor spt6                          | 7.37  | 6.77   | 7.92   | 7.35   | 13.84  | 17.32  | 13.49  | 14.88  | 2.02   | 0.001587886 |
| Asa5G03868 | Putative origin recognition complex subunit 3                 | 0.61  | 0.44   | 0.76   | 0.6    | 1.36   | 2.32   | 1.38   | 1.69   | 2.8    | 0.001606593 |
| Asa0G02765 | Unknown protein                                               | 10.31 | 9.71   | 11.62  | 10.55  | 22.48  | 33.87  | 23.01  | 26.45  | 2.51   | 0.001614157 |
| Asa8G06242 | Polyadenylate-binding protein RBP45                           | 0     | 0.05   | 0.12   | 0.06   | 0.35   | 1      | 0.63   | 0.66   | 11.65  | 0.001624627 |
| Asa5G02951 | DNA topoisomerase I                                           | 14.87 | 13.48  | 13.14  | 13.83  | 27.67  | 30.7   | 27.59  | 28.65  | 2.07   | 0.001626725 |

|            |                                                                  |       |       |       |       |        |        |        |        |       |             |
|------------|------------------------------------------------------------------|-------|-------|-------|-------|--------|--------|--------|--------|-------|-------------|
| Asa7G02004 | Ribonucleoside-diphosphate reductase                             | 18.34 | 18.72 | 20.61 | 19.22 | 41.13  | 47.33  | 29.85  | 39.44  | 2.05  | 0.001658077 |
| Asa6G01269 | Chaperone DnaK                                                   | 38.94 | 40.73 | 43.93 | 41.2  | 83.2   | 100.1  | 71.38  | 84.89  | 2.06  | 0.001679316 |
| Asa2G00397 | Unknown protein                                                  | 0     | 0     | 0     | 0     | 0      | 40.09  | 64.46  | 34.85  | 3485  | 0.001680015 |
| Asa1G02092 | FAD_binding_3 domain-containing protein                          | 0.06  | 0.03  | 0.11  | 0.07  | 0.49   | 0.55   | 0.67   | 0.57   | 8.55  | 0.001687238 |
| Asa3G04408 | Movement protein binding protein 2C                              | 8.32  | 8.53  | 9.84  | 8.9   | 19.49  | 21.89  | 16.85  | 19.41  | 2.18  | 0.001690697 |
| Asa3G02227 | Kinesin                                                          | 0.86  | 0.79  | 0.92  | 0.86  | 1.64   | 2.75   | 2.63   | 2.34   | 2.73  | 0.001721478 |
| Asa5G03649 | Ethylene-responsive transcription factor 2                       | 15.97 | 13.49 | 14.43 | 14.63 | 25.66  | 33.36  | 31.72  | 30.25  | 2.07  | 0.001726443 |
| Asa6G05061 | Abhydrolase_2 domain-containing protein                          | 0.66  | 1.11  | 0.82  | 0.86  | 2.02   | 3.89   | 2.93   | 2.95   | 3.41  | 0.001778319 |
| Asa6G02510 | cell division control protein 48 homolog C-like                  | 65.53 | 64.79 | 64.12 | 64.81 | 117.37 | 133.65 | 155.05 | 135.36 | 2.09  | 0.001808477 |
| Asa8G05934 | Ribosomal L1 domain-containing protein                           | 10.6  | 9.88  | 11.38 | 10.62 | 21.55  | 26.97  | 16.03  | 21.52  | 2.03  | 0.001808802 |
| Asa5G05932 | DnaJ                                                             | 14.03 | 12.73 | 14.09 | 13.62 | 30.65  | 35.12  | 25.6   | 30.46  | 2.24  | 0.001826235 |
| Asa7G00781 | Ultraviolet-B receptor UVR8                                      | 3.87  | 4.34  | 3.68  | 3.96  | 9.08   | 11.33  | 10.25  | 10.22  | 2.58  | 0.001842654 |
| Asa2G02049 | Protein RecA                                                     | 2.91  | 1.93  | 2.98  | 2.61  | 5.02   | 8.37   | 5.51   | 6.3    | 2.42  | 0.001842746 |
| Asa6G03767 | ABC transporter-like protein                                     | 3.47  | 3.02  | 2.57  | 3.02  | 6.23   | 7.87   | 9.24   | 7.78   | 2.58  | 0.001865773 |
| Asa4G00855 | Haloacid dehalogenase-like hydrolase domain-containing protein 3 | 8.26  | 9     | 8.86  | 8.71  | 20.1   | 24.72  | 14.29  | 19.7   | 2.26  | 0.001867797 |
| Asa3G00549 | B3 domain-containing protein                                     | 5.12  | 3.59  | 4.16  | 4.29  | 8.63   | 11.11  | 12.89  | 10.88  | 2.54  | 0.001873931 |
| Asa6G02281 | cell division control protein 48 homolog C-like                  | 82.4  | 82.27 | 81.61 | 82.09 | 148.88 | 169.83 | 194.03 | 170.91 | 2.08  | 0.001877008 |
| Asa6G03581 | BRCT domain-containing protein                                   | 0.74  | 0.76  | 0.89  | 0.8   | 1.52   | 2.75   | 2.33   | 2.2    | 2.76  | 0.001937808 |
| Asa2G03095 | protein UPSTREAM OF FLC-like                                     | 0.82  | 0.39  | 0.71  | 0.64  | 1.71   | 3.4    | 1.93   | 2.35   | 3.67  | 0.001941792 |
| Asa7G01739 | Ribonucloprotein                                                 | 44.84 | 46.72 | 55.22 | 48.93 | 91.06  | 113.42 | 112.82 | 105.77 | 2.16  | 0.0019587   |
| Asa1G03511 | Reductase                                                        | 0     | 0     | 0.08  | 0.03  | 0.19   | 14.23  | 12.7   | 9.04   | 339   | 0.001962175 |
| Asa6G03850 | AAA domain-containing protein                                    | 8.19  | 7.99  | 8.21  | 8.13  | 16.12  | 18.78  | 15.46  | 16.79  | 2.06  | 0.001962175 |
| Asa2G04257 | ATP-dependent 6-phosphofructokinase                              | 45.97 | 46.35 | 47.01 | 46.44 | 106.43 | 96.83  | 88.6   | 97.29  | 2.09  | 0.001974944 |
| Asa7G04608 | Erythronate-4-phosphate dehydrogenase family protein             | 11.71 | 16.03 | 13.65 | 13.8  | 31.67  | 58.16  | 36.4   | 42.08  | 3.05  | 0.001984821 |
| Asa2G03046 | CP-type G domain-containing protein                              | 26.05 | 24.7  | 24.9  | 25.22 | 45.36  | 56.57  | 52.15  | 51.36  | 2.04  | 0.002002844 |
| Asa4G00723 | MYB-related transcription factor                                 | 4.53  | 3.18  | 4.38  | 4.03  | 9.36   | 14.43  | 7.81   | 10.53  | 2.61  | 0.002008027 |
| Asa8G04901 | Receptor-like protein kinase                                     | 0.42  | 0.34  | 0.54  | 0.43  | 1.83   | 2.72   | 1.11   | 1.89   | 4.35  | 0.002065334 |
| Asa2G01320 | Midasin                                                          | 1.01  | 0.61  | 0.93  | 0.85  | 1.98   | 2.85   | 2.9    | 2.58   | 3.03  | 0.00207432  |
| Asa2G01057 | NAC domain                                                       | 0.27  | 0.28  | 0.42  | 0.32  | 1.77   | 1.61   | 1.84   | 1.74   | 5.38  | 0.00210866  |
| Asa8G02225 | UPF0481 protein                                                  | 0.19  | 0.24  | 0.36  | 0.26  | 0.86   | 2.17   | 1.86   | 1.63   | 6.19  | 0.002111872 |
| Asa0G05412 | 4-coumarate--CoA ligase-like 4                                   | 60.47 | 59.04 | 67.65 | 62.39 | 142.06 | 122.77 | 164.51 | 143.11 | 2.29  | 0.002134857 |
| Asa5G05906 | IST1-like protein                                                | 0.13  | 0.21  | 0.32  | 0.22  | 0.65   | 1.18   | 1.26   | 1.03   | 4.68  | 0.002140069 |
| Asa8G03592 | ABC transporter-like protein                                     | 0.09  | 0.02  | 0     | 0.04  | 0.24   | 0.74   | 0.39   | 0.46   | 12.45 | 0.002143776 |
| Asa2G02918 | O-methyltransferase, putative                                    | 1.23  | 0.77  | 0.8   | 0.93  | 4.21   | 2.43   | 3.03   | 3.22   | 3.45  | 0.002147414 |
| Asa7G03103 | DDB1-and CUL4-associated factor 8                                | 4.54  | 3.9   | 3.56  | 4     | 7.8    | 10.68  | 9.41   | 9.3    | 2.32  | 0.002151162 |
| Asa2G02854 | DNA replication complex GINS protein SLD5                        | 1.85  | 1.25  | 1.78  | 1.63  | 6.77   | 6.8    | 11.18  | 8.25   | 5.07  | 0.002193494 |
| Asa6G00043 | Cell wall protein                                                | 19.88 | 8.6   | 21.59 | 16.69 | 103.52 | 54.35  | 104.38 | 87.42  | 5.24  | 0.002215656 |
| Asa2G00511 | Putative nucleoredoxin 2                                         | 1.1   | 1.7   | 0.85  | 1.22  | 4.18   | 4.24   | 6.18   | 4.87   | 4     | 0.002215656 |
| Asa5G02542 | WD-40 repeat-containing protein MSI4                             | 22.62 | 21.18 | 21.57 | 21.79 | 38.92  | 46.95  | 49.25  | 45.04  | 2.07  | 0.002215656 |
| Asa2G05778 | PREDICTED: rop guanine nucleotide exchange factor                | 0.73  | 0.6   | 0.42  | 0.58  | 1.39   | 2.25   | 2.47   | 2.04   | 3.49  | 0.002238439 |
| Asa7G04071 | Protein FAM91A1                                                  | 2.42  | 2.52  | 3.01  | 2.65  | 5.3    | 6.75   | 4.82   | 5.62   | 2.12  | 0.002250719 |
| Asa2G02674 | Usp domain-containing protein                                    | 5.61  | 4.48  | 4.09  | 4.73  | 12.34  | 10.88  | 12.1   | 11.77  | 2.49  | 0.002259124 |
| Asa0G05405 | Histone H2A                                                      | 7.33  | 5.6   | 8.61  | 7.18  | 17.86  | 38.89  | 25.06  | 27.27  | 3.8   | 0.002259852 |
| Asa0G04893 | Unknown protein                                                  | 3.76  | 2.91  | 2.88  | 3.18  | 9.67   | 7.8    | 8.04   | 8.5    | 2.67  | 0.002267799 |
| Asa1G02261 | Unknown protein                                                  | 0.48  | 0.35  | 0.28  | 0.37  | 2.1    | 3.28   | 2.32   | 2.57   | 6.94  | 0.002280865 |
| Asa4G02453 | BPL/LPL catalytic domain-containing protein                      | 0.9   | 1.08  | 1.09  | 1.02  | 2.51   | 3.29   | 3.22   | 3.01   | 2.94  | 0.002280865 |

|            |                                                                           |        |        |        |        |        |        |        |        |         |             |
|------------|---------------------------------------------------------------------------|--------|--------|--------|--------|--------|--------|--------|--------|---------|-------------|
| Asa2G03278 | Calmodulin-binding transcription activator 5                              | 55.5   | 53.03  | 52.07  | 53.53  | 95.88  | 109.67 | 125.43 | 110.33 | 2.06    | 0.0022962   |
| Asa3G00952 | tRNA (guanine(26)-N(2))-dimethyltransferase                               | 27.95  | 24.12  | 27.55  | 26.54  | 44.53  | 59.67  | 62.1   | 55.43  | 2.09    | 0.002364727 |
| Asa2G06181 | Peptidylprolyl isomerase                                                  | 83.53  | 71.21  | 78.83  | 77.86  | 159.32 | 156.82 | 159.9  | 158.68 | 2.04    | 0.002377766 |
| Asa1G03724 | Bet_v_1 domain-containing protein                                         | 6.08   | 7.1    | 7.16   | 6.78   | 68.5   | 31.3   | 72.14  | 57.31  | 8.45    | 0.002386466 |
| Asa1G02211 | protein TIME FOR COFFEE-like isoform X3                                   | 0.28   | 0.11   | 0.42   | 0.27   | 1.26   | 3.07   | 3.42   | 2.58   | 9.57    | 0.002387094 |
| Asa3G02249 | Peptide chain release factor 1                                            | 6.43   | 4.62   | 5.93   | 5.66   | 14.12  | 13.98  | 13.88  | 13.99  | 2.47    | 0.002387094 |
| Asa5G02399 | 70-kDa heat shock protein                                                 | 111.07 | 101.27 | 128.5  | 113.61 | 284.93 | 288.44 | 173.59 | 248.99 | 2.19    | 0.002395574 |
| Asa5G05595 | Cytochrome P450 family protein, expressed                                 | 0.35   | 0.19   | 0.29   | 0.28   | 1.36   | 1.16   | 0.92   | 1.15   | 4.14    | 0.00240643  |
| Asa7G01592 | Rep_fac-A_C domain-containing protein                                     | 18.06  | 16.81  | 20.64  | 18.5   | 43.54  | 35.96  | 37.34  | 38.95  | 2.1     | 0.002441125 |
| Asa6G04602 | Trypsin inhibitor                                                         | 0      | 0      | 0      | 0      | 0      | 13.88  | 17.3   | 10.39  | 1039.33 | 0.002441819 |
| Asa3G00462 | Tubulin alpha chain                                                       | 101.88 | 97.49  | 125.14 | 108.17 | 181.89 | 298.1  | 247.55 | 242.51 | 2.24    | 0.002448143 |
| Asa3G01407 | Non-specific lipid-transfer protein                                       | 2.92   | 4.35   | 2.97   | 3.41   | 8.52   | 8.58   | 11.19  | 9.43   | 2.76    | 0.002498613 |
| Asa7G04461 | Unknown protein                                                           | 9.99   | 7.13   | 8.26   | 8.46   | 19.94  | 20.58  | 13.49  | 18     | 2.13    | 0.002504122 |
| Asa6G03479 | glutamyl-tRNA (Gln) amidotransferase subunit A (DUF620)                   | 1.64   | 2.07   | 2.19   | 1.97   | 5      | 7.69   | 9.01   | 7.23   | 3.68    | 0.002532776 |
| Asa1G00306 | G protein gamma domain-containing protein                                 | 1.15   | 1.08   | 1.93   | 1.39   | 3.22   | 6.2    | 3.98   | 4.47   | 3.22    | 0.002533271 |
| Asa3G03157 | L-ascorbate oxidase                                                       | 0      | 0.08   | 0.09   | 0.06   | 1.61   | 18.89  | 9.45   | 9.98   | 176.18  | 0.002541974 |
| Asa0G05517 | PREDICTED: abscisic acid 8'-hydroxylase                                   | 16.09  | 16.14  | 21.52  | 17.92  | 67.06  | 87.15  | 37.81  | 64.01  | 3.57    | 0.00254616  |
| Asa2G06855 | Acyl-[acyl-carrier-protein] desaturase                                    | 0      | 0.02   | 0      | 0.01   | 0.08   | 6.37   | 4.87   | 3.77   | 566     | 0.002557399 |
| Asa2G02910 | O-methyltransferase                                                       | 47.72  | 49.88  | 54.34  | 50.65  | 102.36 | 110.28 | 98.37  | 103.67 | 2.05    | 0.002597954 |
| Asa3G00161 | Protein recA                                                              | 2.72   | 2.25   | 3.12   | 2.7    | 6.22   | 7.36   | 4.62   | 6.07   | 2.25    | 0.00259934  |
| Asa7G00782 | ultraviolet-B receptor UVR8-like                                          | 2.81   | 2.52   | 3.13   | 2.82   | 4.81   | 8.09   | 7.05   | 6.65   | 2.36    | 0.002608875 |
| Asa0G03072 | Sucrose phosphate synthase                                                | 0.05   | 0.07   | 0.08   | 0.07   | 0.31   | 0.32   | 0.5    | 0.38   | 5.65    | 0.002608875 |
| Asa3G02152 | RNA cytidine acetyltransferase                                            | 28.71  | 26.36  | 27.23  | 27.43  | 50.22  | 58.89  | 56.25  | 55.12  | 2.01    | 0.002624673 |
| Asa4G00370 | Lectin-like protein                                                       | 17.46  | 7.84   | 8.21   | 11.17  | 23.68  | 33.36  | 24.18  | 27.07  | 2.42    | 0.002644074 |
| Asa3G01903 | Myb_DNA-bind_3 domain-containing protein                                  | 2.69   | 2.36   | 2.47   | 2.51   | 6.08   | 5.73   | 7.11   | 6.31   | 2.52    | 0.002673013 |
| Asa6G02282 | ATP-dependent zinc metalloprotease FtsH                                   | 81.11  | 85.77  | 81     | 82.63  | 148.96 | 172.13 | 191.55 | 170.88 | 2.07    | 0.002674733 |
| Asa3G01479 | Ethylene insensitive 3                                                    | 0.95   | 1.07   | 0.75   | 0.92   | 2.08   | 2.7    | 3.23   | 2.67   | 2.89    | 0.002676996 |
| Asa8G03217 | Glycerol-3-phosphate acyltransferase 1                                    | 0.13   | 0.04   | 0.08   | 0.08   | 0.59   | 0.39   | 0.81   | 0.6    | 7.16    | 0.002746741 |
| Asa7G02038 | protein UPSTREAM OF FLC                                                   | 0.33   | 0.46   | 0.46   | 0.42   | 1.71   | 4.92   | 3.01   | 3.21   | 7.71    | 0.002747713 |
| Asa7G02174 | Late embryogenesis abundant (LEA) hydroxyproline-rich glycoprotein family | 4.83   | 4.61   | 5.47   | 4.97   | 9.31   | 13.31  | 10.09  | 10.9   | 2.19    | 0.002748553 |
| Asa5G02632 | Factor of DNA methylation 1                                               | 8.83   | 9.38   | 8.82   | 9.01   | 15.16  | 21.84  | 21.82  | 19.61  | 2.18    | 0.002754381 |
| Asa6G00060 | Glycosyltransferase                                                       | 1.72   | 1.45   | 1.19   | 1.45   | 2.9    | 4.18   | 3.55   | 3.54   | 2.44    | 0.002754381 |
| Asa0G05107 | rRNA 2'-O-methyltransferase fibrillarin                                   | 7.16   | 6.34   | 7.24   | 6.91   | 15.31  | 22.48  | 12.12  | 16.64  | 2.41    | 0.002757533 |
| Asa7G05211 | dnaJ homolog subfamily C member 2                                         | 16.01  | 12.21  | 13.46  | 13.89  | 30.57  | 29.62  | 28.43  | 29.54  | 2.13    | 0.002760777 |
| Asa6G02280 | ATP-dependent zinc metalloprotease FtsH                                   | 55.84  | 57.9   | 54.68  | 56.14  | 103.78 | 119.62 | 122.16 | 115.19 | 2.05    | 0.002770613 |
| Asa7G06128 | WPP domain-containing protein                                             | 0.98   | 1.03   | 1.36   | 1.12   | 3.98   | 11.17  | 7.13   | 7.43   | 6.61    | 0.002780552 |
| Asa4G04827 | DNA double-strand break repair rad50 ATPase                               | 7.65   | 9.41   | 9.68   | 8.91   | 23.12  | 24.56  | 17.16  | 21.61  | 2.42    | 0.002780552 |
| Asa8G02594 | Kinesin                                                                   | 1.23   | 1.14   | 1.18   | 1.18   | 2.52   | 3.94   | 4.36   | 3.61   | 3.05    | 0.002783392 |
| Asa8G03278 | Brix domain-containing protein                                            | 7.04   | 7.61   | 7.15   | 7.27   | 12.62  | 18.95  | 14.43  | 15.33  | 2.11    | 0.002797277 |
| Asa3G01178 | Nsp1_C domain-containing protein                                          | 22.23  | 20.07  | 23.65  | 21.98  | 39.14  | 46.34  | 50.52  | 45.33  | 2.06    | 0.002803031 |
| Asa1G00085 | ATP-dependent DNA helicase                                                | 3.23   | 2.97   | 3.11   | 3.1    | 5.47   | 6.93   | 7.75   | 6.72   | 2.16    | 0.002812682 |
| Asa2G05548 | Importin N-terminal domain-containing protein                             | 3.66   | 2.79   | 2.31   | 2.92   | 5.65   | 10.41  | 8.91   | 8.32   | 2.85    | 0.002849595 |
| Asa6G05051 | Unknown protein                                                           | 0.17   | 0.19   | 0.25   | 0.2    | 15.69  | 15.72  | 49.41  | 26.94  | 132.49  | 0.00285628  |
| Asa7G03821 | C2H2-type domain-containing protein                                       | 1.07   | 2.1    | 2.62   | 1.93   | 6.38   | 12.34  | 6.42   | 8.38   | 4.34    | 0.002872846 |
| Asa0G01197 | Glutamyl-tRNA(Gln) amidotransferase subunit A, putative                   | 4.02   | 4.56   | 4.71   | 4.43   | 8.08   | 11.72  | 9.94   | 9.91   | 2.24    | 0.002894749 |

|            |                                                             |        |        |        |        |        |        |        |        |       |             |
|------------|-------------------------------------------------------------|--------|--------|--------|--------|--------|--------|--------|--------|-------|-------------|
| Asa7G03096 | serine/arginine repetitive matrix protein 2-like isoform X2 | 12.53  | 12.82  | 13.25  | 12.87  | 25.97  | 30.34  | 20.85  | 25.72  | 2     | 0.002900813 |
| Asa5G01500 | PREDICTED: WUSCHEL-related homeobox                         | 0      | 0      | 0.11   | 0.04   | 0.71   | 3.23   | 1.89   | 1.94   | 53    | 0.002914286 |
| Asa0G02308 | Hydroxyproline-rich glycoprotein family protein             | 0.65   | 0.38   | 0.64   | 0.56   | 1.63   | 2.49   | 1.57   | 1.9    | 3.41  | 0.002922726 |
| Asa6G06923 | B box-type domain-containing protein                        | 0.97   | 0.84   | 0.83   | 0.88   | 2.49   | 3.28   | 3.06   | 2.94   | 3.34  | 0.002925409 |
| Asa4G03066 | Protein disulfide isomerase-like protein 2-3                | 8.91   | 6.77   | 6.54   | 7.41   | 14.44  | 19.15  | 13.74  | 15.78  | 2.13  | 0.0029715   |
| Asa2G02806 | Cytochrome P450                                             | 2.43   | 2.49   | 2.81   | 2.58   | 5.69   | 6.57   | 5.13   | 5.8    | 2.25  | 0.002977761 |
| Asa4G04839 | Molybdenum cofactor sulfurase                               | 4.14   | 3.87   | 3.83   | 3.95   | 6.8    | 9.1    | 8.79   | 8.23   | 2.09  | 0.002981418 |
| Asa7G01530 | AP2/ERF domain-containing transcription factor              | 3.38   | 2.12   | 2.31   | 2.6    | 5.91   | 7.23   | 5.66   | 6.27   | 2.41  | 0.002993612 |
| Asa7G06798 | Dihydroxy-acid dehydratase                                  | 41.35  | 40.77  | 44.49  | 42.2   | 74.67  | 86.23  | 97.34  | 86.08  | 2.04  | 0.003045953 |
| Asa4G03526 | DUF4110 domain-containing protein                           | 20.58  | 16.16  | 17.7   | 18.15  | 36.5   | 36.93  | 42.81  | 38.75  | 2.14  | 0.003058373 |
| Asa4G03605 | 60S ribosomal protein L3-like protein                       | 6.86   | 6.21   | 8.13   | 7.07   | 18.82  | 17.29  | 11.13  | 15.75  | 2.23  | 0.003060448 |
| Asa6G05986 | DUF4149 domain-containing protein                           | 0      | 0      | 0      | 0      | 0.22   | 0.13   | 0.37   | 0.24   | 24    | 0.003061783 |
| Asa1G01904 | Histone H3                                                  | 2.48   | 2.86   | 3.72   | 3.02   | 6.51   | 13.35  | 9.95   | 9.94   | 3.29  | 0.003064515 |
| Asa7G03940 | Midasin                                                     | 9.9    | 7.46   | 9.66   | 9.01   | 19.16  | 18.11  | 23.78  | 20.35  | 2.26  | 0.00306498  |
| Asa6G04964 | UPF0481 protein                                             | 3.21   | 3.57   | 4.01   | 3.6    | 7.27   | 8.68   | 7.37   | 7.77   | 2.16  | 0.003072499 |
| Asa2G07246 | Transposon TX1 uncharacterized 149 kDa protein              | 31.9   | 32.49  | 34.87  | 33.09  | 87.09  | 67.42  | 70.1   | 74.87  | 2.26  | 0.003095915 |
| Asa0G01424 | Protein kinase domain-containing protein                    | 0.12   | 0.24   | 0      | 0.12   | 1.28   | 1.05   | 1.24   | 1.19   | 9.92  | 0.003099522 |
| Asa7G02805 | BAG family molecular chaperone regulator                    | 2.63   | 2.91   | 3.45   | 3      | 5.43   | 8.76   | 6.31   | 6.83   | 2.28  | 0.003099522 |
| Asa5G02091 | Adenylate kinase subfamily                                  | 12.87  | 14.17  | 14.52  | 13.85  | 27.75  | 32.53  | 31.78  | 30.69  | 2.22  | 0.00311454  |
| Asa2G00619 | Pesticidal crystal cry8Ba protein                           | 4.25   | 3.57   | 4.45   | 4.09   | 7.23   | 11.09  | 11.19  | 9.84   | 2.41  | 0.003137102 |
| Asa2G03791 | Non-specific lipid-transfer protein                         | 4.12   | 3.78   | 4.39   | 4.1    | 10.71  | 8.93   | 13.02  | 10.89  | 2.66  | 0.003161914 |
| Asa7G07358 | LRRNT_2 domain-containing protein                           | 1.21   | 1.72   | 1.94   | 1.62   | 5.57   | 11.25  | 5.53   | 7.45   | 4.59  | 0.003198527 |
| Asa3G03857 | Kinase, putative                                            | 4.42   | 5.16   | 5.45   | 5.01   | 8.88   | 12.58  | 9.85   | 10.44  | 2.08  | 0.003206436 |
| Asa1G03033 | Glutamyl-tRNA(Gln) amidotransferase subunit A               | 5.75   | 5.73   | 5.93   | 5.8    | 10.38  | 12.92  | 13.47  | 12.26  | 2.11  | 0.003255477 |
| Asa8G05156 | Unknown protein                                             | 6.22   | 5.1    | 5.51   | 5.61   | 13.05  | 14.04  | 18.94  | 15.34  | 2.73  | 0.003265544 |
| Asa0G04202 | Rep_fac-A_C domain-containing protein                       | 26.35  | 25.49  | 30.28  | 27.37  | 61.78  | 52.35  | 58.78  | 57.64  | 2.11  | 0.003295934 |
| Asa0G01805 | Putative transcription factor bHLH family                   | 0.14   | 0.16   | 0.39   | 0.23   | 0.75   | 1.8    | 1.12   | 1.22   | 5.32  | 0.003323951 |
| Asa6G04290 | Serine carboxypeptidase, putative                           | 11.11  | 6.13   | 8.52   | 8.59   | 19.67  | 29.74  | 34.84  | 28.08  | 3.27  | 0.003361298 |
| Asa8G02662 | DNA helicase                                                | 2.8    | 2.74   | 3.24   | 2.93   | 8.43   | 22.59  | 18.06  | 16.36  | 5.59  | 0.003388497 |
| Asa4G01230 | PREDICTED: vesicle-associated membrane                      | 21.38  | 21.33  | 21.09  | 21.27  | 39.83  | 45.55  | 47.59  | 44.32  | 2.08  | 0.003426359 |
| Asa3G01570 | Major facilitator superfamily domain-containing protein 12  | 9.83   | 8.99   | 8.96   | 9.26   | 19.57  | 24.92  | 23.82  | 22.77  | 2.46  | 0.003426359 |
| Asa8G01883 | Sucrose phosphate synthase                                  | 0.68   | 0.65   | 0.64   | 0.66   | 2.28   | 2.43   | 1.28   | 2      | 3.04  | 0.003430337 |
| Asa8G04028 | RNase III domain-containing protein                         | 13.57  | 16.29  | 20.58  | 16.81  | 31.67  | 42.23  | 30.99  | 34.96  | 2.08  | 0.003433731 |
| Asa0G00588 | Unknown protein                                             | 0.5    | 0.93   | 1.24   | 0.89   | 3.24   | 5.3    | 3.43   | 3.99   | 4.48  | 0.00347077  |
| Asa0G04496 | Inosine-5'-monophosphate dehydrogenase                      | 5.7    | 5.11   | 5.8    | 5.54   | 9.94   | 14.89  | 12.99  | 12.61  | 2.28  | 0.003472346 |
| Asa3G03202 | WPP domain-containing protein                               | 2      | 1.7    | 2.34   | 2.01   | 6.43   | 18.86  | 13.83  | 13.04  | 6.48  | 0.00348367  |
| Asa0G01963 | Cytochrome p450                                             | 0.34   | 0.37   | 0.31   | 0.34   | 4.07   | 2.3    | 5.91   | 4.09   | 12.04 | 0.003501291 |
| Asa8G05327 | Putative 60S ribosomal protein L14                          | 269.45 | 250.77 | 256.32 | 258.85 | 506.06 | 528.61 | 524.08 | 519.58 | 2.01  | 0.003503728 |
| Asa4G06506 | Unknown protein                                             | 12.22  | 12.38  | 10.18  | 11.59  | 25.63  | 39.13  | 21.38  | 28.71  | 2.48  | 0.00352015  |
| Asa2G03065 | Glycosyltransferase                                         | 1.75   | 1.53   | 1.1    | 1.46   | 2.69   | 4.24   | 3.62   | 3.52   | 2.41  | 0.003529532 |
| Asa2G04751 | Cyclin family protein                                       | 0.02   | 0.06   | 0.15   | 0.08   | 0.75   | 8.38   | 8.16   | 5.76   | 75.17 | 0.003535421 |
| Asa5G05396 | Putative argonaute family protein                           | 0.16   | 0.15   | 0.2    | 0.17   | 0.49   | 0.9    | 0.64   | 0.68   | 3.98  | 0.003555561 |
| Asa7G01126 | Pectin lyase-like superfamily protein                       | 0.56   | 0.32   | 0.93   | 0.6    | 3.34   | 15.4   | 10.88  | 9.87   | 16.36 | 0.003599841 |

|            |                                                                              |        |        |       |        |        |        |        |        |        |             |
|------------|------------------------------------------------------------------------------|--------|--------|-------|--------|--------|--------|--------|--------|--------|-------------|
| Asa5G01817 | DUF4005 domain-containing protein                                            | 9.78   | 9.02   | 10.37 | 9.72   | 15.82  | 25.62  | 22.99  | 21.48  | 2.21   | 0.003600824 |
| Asa8G00919 | Vesicle transport protein                                                    | 5.73   | 4.26   | 4.91  | 4.97   | 11.04  | 12.03  | 13.08  | 12.05  | 2.43   | 0.003611482 |
| Asa0G04870 | Lipoxygenase                                                                 | 2.5    | 3.26   | 4.59  | 3.45   | 8.61   | 17.59  | 17.03  | 14.41  | 4.18   | 0.003666675 |
| Asa0G02592 | protein RETICULATA-RELATED 3, chloroplastic-like                             | 7.93   | 5.83   | 6.2   | 6.65   | 13.3   | 14.52  | 14.66  | 14.16  | 2.13   | 0.003698214 |
| Asa7G01923 | MYB-related transcription factor                                             | 5.12   | 3.21   | 4.45  | 4.26   | 9.66   | 15.45  | 8.28   | 11.13  | 2.61   | 0.003738792 |
| Asa1G01957 | Unknown protein                                                              | 21.09  | 18.01  | 21.87 | 20.32  | 42.64  | 42.61  | 41.56  | 42.27  | 2.08   | 0.003757099 |
| Asa8G04644 | Protein NBR1-like protein                                                    | 10.82  | 8.74   | 12.91 | 10.82  | 20.5   | 27.14  | 23.71  | 23.78  | 2.2    | 0.003761449 |
| Asa2G05549 | Importin N-terminal domain-containing protein                                | 1.68   | 1.94   | 2.19  | 1.94   | 3.59   | 5.73   | 4.35   | 4.56   | 2.35   | 0.003791811 |
| Asa2G04580 | Phosphatidylinositol 4-phosphate 5-kinase 1                                  | 0.24   | 0.3    | 0.16  | 0.23   | 0.64   | 1.46   | 1.04   | 1.05   | 4.49   | 0.003799927 |
| Asa8G01139 | Zinc finger CCCH domain-containing protein                                   | 32.57  | 33.2   | 34.55 | 33.44  | 75.8   | 66.93  | 91.56  | 78.1   | 2.34   | 0.003825297 |
| Asa3G04442 | FHA domain-containing protein                                                | 1.24   | 1.05   | 1.44  | 1.24   | 2.51   | 3.93   | 4.27   | 3.57   | 2.87   | 0.003840049 |
| Asa2G02621 | protein kinase family protein                                                | 48.86  | 50.14  | 48.98 | 49.33  | 106.28 | 98.16  | 100.15 | 101.53 | 2.06   | 0.003840177 |
| Asa3G00933 | U-box domain-containing protein                                              | 0      | 0      | 0     | 0      | 0.09   | 0.84   | 0.52   | 0.48   | 48.33  | 0.003840177 |
| Asa5G04062 | Kinase                                                                       | 12.59  | 11.77  | 13.75 | 12.7   | 22.91  | 27.6   | 25.57  | 25.36  | 2      | 0.003840662 |
| Asa4G05916 | Serine/arginine-rich splicing factor like                                    | 25.98  | 21.06  | 23.96 | 23.67  | 45.41  | 46.75  | 52.31  | 48.16  | 2.03   | 0.003845262 |
| Asa8G04188 | Putative disease resistance protein                                          | 3.58   | 2.5    | 2.75  | 2.94   | 5.83   | 8.78   | 9.67   | 8.09   | 2.75   | 0.003854076 |
| Asa4G03232 | UDP-glycosyltransferase                                                      | 0.78   | 0.75   | 0.77  | 0.77   | 2.22   | 4.85   | 2.6    | 3.22   | 4.2    | 0.003854076 |
| Asa4G03886 | Lipase_3 domain-containing protein                                           | 0.37   | 0.15   | 0.22  | 0.25   | 0.79   | 2.09   | 1.25   | 1.38   | 5.58   | 0.003854076 |
| Asa2G00442 | CYSTM domain-containing protein                                              | 17.69  | 21.07  | 24.04 | 20.93  | 42.59  | 48.74  | 59.5   | 50.28  | 2.4    | 0.003854076 |
| Asa8G04948 | Glucomannan 4-beta-mannosyltransferase                                       | 8.74   | 8.8    | 11.79 | 9.78   | 23.58  | 23.79  | 20.85  | 22.74  | 2.33   | 0.003859785 |
| Asa5G04471 | Small nuclear ribonucleoprotein Sm D3                                        | 1.55   | 1.23   | 1.19  | 1.32   | 2.88   | 6.08   | 5.46   | 4.81   | 3.63   | 0.003874773 |
| Asa2G01153 | Protein UPSTREAM OF FLC-like protein                                         | 2.42   | 1.57   | 2.86  | 2.28   | 6.55   | 17.76  | 15.36  | 13.22  | 5.79   | 0.003922005 |
| Asa0G05416 | 60S ribosomal protein L3-like protein                                        | 2.51   | 3.05   | 3.44  | 3      | 8.43   | 7.41   | 5.19   | 7.01   | 2.34   | 0.003922005 |
| Asa7G07269 | p-loop NTPase domain-containing protein LPA1                                 | 2.2    | 2.17   | 2.9   | 2.42   | 4.32   | 5.64   | 5.98   | 5.31   | 2.19   | 0.003973182 |
| Asa3G01527 | Cinnamoyl-CoA reductase 1                                                    | 4.58   | 3.76   | 4.68  | 4.34   | 10.08  | 10.89  | 10.09  | 10.35  | 2.39   | 0.003978182 |
| Asa4G04430 | Oligopeptide transporter                                                     | 11.68  | 11.81  | 11.17 | 11.55  | 26.57  | 28.09  | 27.52  | 27.39  | 2.37   | 0.00399027  |
| Asa2G05187 | Glutathione S-transferase                                                    | 1.58   | 0.47   | 1.21  | 1.09   | 3.92   | 7.96   | 3.59   | 5.16   | 4.75   | 0.004012178 |
| Asa7G07460 | Dolichyl-diphosphooligosaccharide--protein glycosyltransferase subunit STT3B | 29.86  | 28.77  | 28.48 | 29.04  | 59.6   | 64.88  | 52.34  | 58.94  | 2.03   | 0.004025281 |
| Asa8G03310 | 40S ribosomal protein S4                                                     | 241.36 | 217.42 | 255.5 | 238.09 | 422.68 | 491.51 | 575.73 | 496.64 | 2.09   | 0.004028652 |
| Asa3G01966 | Putative translational activator Gcn1, TOG domain-containing protein         | 6.94   | 7.32   | 7.36  | 7.21   | 12.36  | 16.35  | 15.16  | 14.62  | 2.03   | 0.004082841 |
| Asa2G00964 | ADP-ribosylation factor GTPase-activating protein AGD3-like                  | 1.18   | 1.15   | 1.09  | 1.14   | 2.36   | 2.84   | 2.78   | 2.66   | 2.33   | 0.004105841 |
| Asa2G02622 | protein kinase family protein                                                | 48.08  | 49.77  | 50.89 | 49.58  | 105    | 97.37  | 103.41 | 101.93 | 2.06   | 0.004109478 |
| Asa0G01853 | Mitochondrial glycoprotein family protein, putative                          | 3.53   | 3.32   | 3.38  | 3.41   | 6.71   | 8.61   | 9.67   | 8.33   | 2.44   | 0.004111386 |
| Asa0G03645 | ATP-dependent RNA helicase family protein                                    | 5.01   | 5.38   | 5.21  | 5.2    | 11.14  | 12.56  | 8.81   | 10.84  | 2.08   | 0.004120103 |
| Asa4G02781 | RecA family protein                                                          | 2.61   | 2.92   | 2.55  | 2.69   | 5.83   | 7.38   | 4.93   | 6.05   | 2.25   | 0.004155106 |
| Asa0G05923 | Polygalacturonase inhibitor                                                  | 0      | 0      | 0.03  | 0.01   | 0.15   | 3.66   | 3.14   | 2.32   | 231.67 | 0.004193797 |
| Asa7G03336 | Protein DCL, chloroplastic                                                   | 29.58  | 27.33  | 29.69 | 28.87  | 50.14  | 61.86  | 63.85  | 58.62  | 2.03   | 0.0041991   |
| Asa1G00506 | HORMA domain-containing protein                                              | 3.73   | 3.22   | 3.73  | 3.56   | 6.75   | 7.53   | 9.27   | 7.85   | 2.21   | 0.004227463 |
| Asa4G04728 | protein PAT1 homolog 1-like                                                  | 9.13   | 7.45   | 8.29  | 8.29   | 12.89  | 21.14  | 17.02  | 17.02  | 2.05   | 0.004241449 |
| Asa8G04825 | Wound-responsive family protein                                              | 0.26   | 0.15   | 0     | 0.14   | 2.92   | 1.13   | 3.29   | 2.45   | 17.9   | 0.004260267 |
| Asa4G01373 | Pollen Ole e 1 allergen/extensin                                             | 0.1    | 0.11   | 0     | 0.07   | 0.47   | 1.76   | 1.03   | 1.09   | 15.52  | 0.004272446 |
| Asa6G05930 | DNA repair protein RAD4                                                      | 3.21   | 3.28   | 3.1   | 3.2    | 6.22   | 7.29   | 6.57   | 6.69   | 2.09   | 0.004295234 |
| Asa0G03321 | Histone H3                                                                   | 11.43  | 10.87  | 17.81 | 13.37  | 29.92  | 66.14  | 48.97  | 48.34  | 3.62   | 0.004305447 |

|            |                                                                      |       |       |       |       |        |        |        |        |        |             |
|------------|----------------------------------------------------------------------|-------|-------|-------|-------|--------|--------|--------|--------|--------|-------------|
| Asa1G03908 | Phosphosulfolactate synthase                                         | 15.31 | 15.4  | 18.03 | 16.25 | 40.45  | 32.41  | 30.23  | 34.36  | 2.12   | 0.004331439 |
| Asa0G02210 | Unknown protein                                                      | 6.66  | 7.04  | 7.99  | 7.23  | 17.07  | 16.28  | 15.63  | 16.33  | 2.26   | 0.004382758 |
| Asa2G00825 | Cytochrome P450                                                      | 1.73  | 1.56  | 1.54  | 1.61  | 2.8    | 4.85   | 4.45   | 4.03   | 2.51   | 0.00438644  |
| Asa6G00909 | TPR_REGION domain-containing protein                                 | 12.31 | 11.45 | 11.89 | 11.88 | 21.64  | 24.69  | 24.95  | 23.76  | 2      | 0.004434984 |
| Asa0G04668 | plant cysteine oxidase 2-like                                        | 9.62  | 9.63  | 7.34  | 8.86  | 16.32  | 23.02  | 24.73  | 21.36  | 2.41   | 0.00443747  |
| Asa6G02928 | Rab-GAP TBC domain-containing protein                                | 5.08  | 5.23  | 6.56  | 5.62  | 10.52  | 13.62  | 9.99   | 11.38  | 2.02   | 0.004455237 |
| Asa6G07112 | Unknown protein                                                      | 2.01  | 2.12  | 1.97  | 2.03  | 7.62   | 6.5    | 5.76   | 6.63   | 3.26   | 0.004498189 |
| Asa5G02813 | Peroxidase                                                           | 4.84  | 5.66  | 6.78  | 5.76  | 16.68  | 14.23  | 21.57  | 17.49  | 3.04   | 0.004538635 |
| Asa4G06053 | IENR2 domain-containing protein                                      | 5.61  | 4.46  | 4.96  | 5.01  | 9      | 11.06  | 11.81  | 10.62  | 2.12   | 0.004540542 |
| Asa1G03337 | 60 kDa chaperonin                                                    | 4.96  | 5.47  | 5.96  | 5.46  | 11.48  | 12.77  | 9.74   | 11.33  | 2.07   | 0.004551026 |
| Asa3G00672 | Hydroxyproline-rich glycoprotein family protein                      | 0.27  | 0.29  | 0.36  | 0.31  | 1.9    | 3.68   | 1.31   | 2.3    | 7.49   | 0.004562548 |
| Asa6G06337 | CCHC-type domain-containing protein                                  | 1.23  | 0.81  | 1.44  | 1.16  | 2.83   | 4.45   | 2.6    | 3.29   | 2.84   | 0.004568545 |
| Asa7G01239 | Exostosin domain-containing protein                                  | 2.19  | 2.21  | 3.43  | 2.61  | 6.34   | 13.36  | 8.04   | 9.25   | 3.54   | 0.004580498 |
| Asa5G03610 | Tubulin beta chain                                                   | 1.05  | 0.89  | 1.19  | 1.04  | 1.96   | 3.91   | 2.88   | 2.92   | 2.8    | 0.004586395 |
| Asa6G02815 | PREDICTED: COP1-interacting                                          | 2.67  | 2.53  | 2.63  | 2.61  | 5.41   | 9.95   | 10.03  | 8.46   | 3.24   | 0.004589162 |
| Asa4G01215 | Peroxidase                                                           | 0     | 0.28  | 0.19  | 0.16  | 1.05   | 0.96   | 1.12   | 1.04   | 6.66   | 0.004613538 |
| Asa2G02475 | Serine--tRNA ligase                                                  | 21.92 | 18.34 | 21.88 | 20.71 | 33.55  | 46.74  | 47.39  | 42.56  | 2.05   | 0.004636441 |
| Asa8G04947 | Phycocyanin domain-containing protein                                | 0     | 0.04  | 0.21  | 0.08  | 0.35   | 20.69  | 20.29  | 13.78  | 165.32 | 0.004657129 |
| Asa0G03659 | Receptor-like serine/threonine-protein kinase                        | 8.9   | 10.95 | 9.38  | 9.74  | 23.17  | 18.91  | 22.08  | 21.39  | 2.2    | 0.004673233 |
| Asa8G05285 | DNA helicase                                                         | 1.63  | 1.75  | 1.71  | 1.7   | 5.46   | 13.71  | 7.58   | 8.92   | 5.26   | 0.004673233 |
| Asa4G05606 | Putative H/ACA ribonucleoprotein complex subunit 3-like protein-like | 4.8   | 5.8   | 5.24  | 5.28  | 10.25  | 13.92  | 13.5   | 12.56  | 2.38   | 0.004689541 |
| Asa2G06281 | DNA_pol3_gamma3 domain-containing protein                            | 0.78  | 0.69  | 0.91  | 0.79  | 1.56   | 2.23   | 2.54   | 2.11   | 2.66   | 0.004743085 |
| Asa0G00175 | Nuclear pore complex protein Nup85                                   | 14.93 | 14.16 | 15.88 | 14.99 | 26.73  | 29.54  | 34.96  | 30.41  | 2.03   | 0.00474947  |
| Asa7G06279 | ALOG domain-containing protein                                       | 0.96  | 0.85  | 0.62  | 0.81  | 4.39   | 21.73  | 18.69  | 14.94  | 18.44  | 0.004753815 |
| Asa4G05441 | BHLH transcription factor                                            | 7.05  | 7.65  | 6.79  | 7.16  | 15.44  | 21.51  | 25.75  | 20.9   | 2.92   | 0.004765934 |
| Asa2G07528 | Prolyl endopeptidase-like                                            | 1.26  | 0.57  | 0.44  | 0.76  | 1.62   | 2.99   | 2.42   | 2.34   | 3.1    | 0.004803288 |
| Asa6G03157 | F-box domain containing protein                                      | 20.03 | 19.96 | 21.88 | 20.62 | 41.55  | 39.44  | 47.56  | 42.85  | 2.08   | 0.00481419  |
| Asa3G00904 | DUF632 domain-containing protein/DUF630 domain-containing protein    | 8.68  | 9.77  | 9.2   | 9.22  | 15.82  | 23.08  | 23.69  | 20.86  | 2.26   | 0.004845388 |
| Asa6G02220 | Kinase family protein                                                | 8.24  | 7.89  | 7.39  | 7.84  | 14.17  | 16.49  | 18.22  | 16.29  | 2.08   | 0.004862859 |
| Asa1G04264 | Nuclear transcription factor Y subunit A                             | 11.86 | 9.68  | 11.62 | 11.05 | 24     | 24.98  | 33.5   | 27.49  | 2.49   | 0.004877766 |
| Asa7G04963 | Protein kinase family protein                                        | 14.62 | 11.54 | 9.92  | 12.03 | 26.09  | 25.81  | 22.29  | 24.73  | 2.06   | 0.004908342 |
| Asa7G02071 | Kinase, putative                                                     | 1.47  | 1.78  | 2.2   | 1.82  | 3.66   | 5.95   | 6.19   | 5.27   | 2.9    | 0.004919988 |
| Asa0G03472 | Poly [ADP-ribose] polymerase                                         | 4.02  | 4.26  | 4.61  | 4.3   | 8.63   | 10.23  | 7.29   | 8.72   | 2.03   | 0.004946907 |
| Asa0G05043 | Dynein light chain                                                   | 1.61  | 2.91  | 1.39  | 1.97  | 8.02   | 9.08   | 6.79   | 7.96   | 4.04   | 0.004947859 |
| Asa4G05947 | RNA cytidine acetyltransferase                                       | 6.62  | 6.3   | 7.45  | 6.79  | 11.87  | 16.16  | 13.4   | 13.81  | 2.03   | 0.004956417 |
| Asa6G00823 | Polygalacturonase inhibitor                                          | 8.45  | 10.17 | 5.76  | 8.13  | 22.83  | 27.65  | 37.9   | 29.46  | 3.63   | 0.005052516 |
| Asa7G01172 | probable serine/threonine-protein kinase dyrk2                       | 0.16  | 0.35  | 0.4   | 0.3   | 1.05   | 1.79   | 1.02   | 1.29   | 4.24   | 0.005137451 |
| Asa8G05897 | DNA helicase                                                         | 2.53  | 2.56  | 3.28  | 2.79  | 9.87   | 26.88  | 14.63  | 17.13  | 6.14   | 0.005177129 |
| Asa4G00256 | Unknown protein                                                      | 60.93 | 59.68 | 56.87 | 59.16 | 108.87 | 119.42 | 133.31 | 120.53 | 2.04   | 0.005232056 |
| Asa1G00942 | HTH-type transcriptional regulator protein ptxE                      | 1.04  | 0.6   | 0.8   | 0.81  | 2.98   | 2.8    | 2.1    | 2.63   | 3.23   | 0.005237635 |
| Asa1G00949 | HTH-type transcriptional regulator protein ptxE                      | 8.24  | 6.53  | 5.53  | 6.77  | 20.68  | 47.98  | 24.96  | 31.21  | 4.61   | 0.005246487 |
| Asa7G02005 | Ribonucleoside-diphosphate reductase                                 | 12.16 | 13.35 | 13.28 | 12.93 | 25.05  | 35.27  | 20.28  | 26.87  | 2.08   | 0.00525513  |
| Asa6G03588 | DUF4228 domain protein                                               | 0.14  | 0.29  | 0.22  | 0.22  | 0.99   | 1.59   | 2      | 1.53   | 7.05   | 0.005316021 |
| Asa2G02272 | Unknown protein                                                      | 7.87  | 8.44  | 7.48  | 7.93  | 16.82  | 18.27  | 20.94  | 18.68  | 2.36   | 0.005332169 |
| Asa2G06055 | HTH-type transcriptional regulator                                   | 6.27  | 4.36  | 4.01  | 4.88  | 10.23  | 13.71  | 8.97   | 10.97  | 2.25   | 0.005336296 |



|            |                                                             |       |       |       |       |        |        |       |        |       |             |
|------------|-------------------------------------------------------------|-------|-------|-------|-------|--------|--------|-------|--------|-------|-------------|
| Asa2G02986 | Probable 6-phosphogluconolactonase                          | 43.66 | 48.71 | 47.89 | 46.75 | 89.57  | 103.07 | 125.7 | 106.11 | 2.27  | 0.005359001 |
| Asa4G02647 | MADS-box transcription factor                               | 0.41  | 0.61  | 0.95  | 0.66  | 3.15   | 10.15  | 5.46  | 6.25   | 9.52  | 0.005393796 |
| Asa7G00904 | Brix domain                                                 | 10.56 | 10.22 | 10.99 | 10.59 | 21.86  | 23.92  | 18.91 | 21.56  | 2.04  | 0.005393796 |
| Asa6G03993 | ethylene-responsive transcription factor                    | 7.95  | 6.17  | 7.71  | 7.28  | 13.59  | 15.75  | 19.16 | 16.17  | 2.22  | 0.005439498 |
| Asa8G04949 | Pentatricopeptide repeat-containing protein                 | 2.17  | 2.35  | 2.45  | 2.32  | 5.49   | 6.04   | 7.59  | 6.37   | 2.74  | 0.005458968 |
| Asa0G02744 | Glycosyltransferase                                         | 0.08  | 0.15  | 0.28  | 0.17  | 0.59   | 1.35   | 0.71  | 0.88   | 5.2   | 0.00547038  |
| Asa2G04120 | Unknown protein                                             | 8.28  | 13.02 | 13.75 | 11.68 | 27.11  | 31.04  | 21.1  | 26.42  | 2.26  | 0.005496306 |
| Asa7G04769 | TGF-beta-activated kinase 1 and MAP3K7-binding protein like | 0.1   | 0     | 0.3   | 0.13  | 1.1    | 1.71   | 1.31  | 1.37   | 10.3  | 0.005513186 |
| Asa3G03200 | RIX1 domain-containing protein                              | 10.09 | 10.93 | 10.77 | 10.6  | 19.56  | 21.83  | 23.05 | 21.48  | 2.03  | 0.005520975 |
| Asa3G04223 | Hydroxyproline-rich glycoprotein family protein             | 10.41 | 9.94  | 10.48 | 10.28 | 16.1   | 24.18  | 23.34 | 21.21  | 2.06  | 0.005566699 |
| Asa2G07059 | Cyclin                                                      | 1.74  | 0.88  | 1.44  | 1.35  | 4.48   | 11.29  | 5.75  | 7.17   | 5.3   | 0.005676953 |
| Asa7G00783 | Histone H2B                                                 | 17.89 | 17.29 | 24.24 | 19.81 | 46.36  | 97.94  | 57.72 | 67.34  | 3.4   | 0.005704016 |
| Asa4G01272 | zinc finger protein WIP2-like                               | 0.85  | 0.29  | 0.51  | 0.55  | 1.16   | 2.06   | 1.82  | 1.68   | 3.05  | 0.005754883 |
| Asa4G05761 | Protein kinase family protein                               | 0.96  | 0.74  | 0.76  | 0.82  | 1.41   | 2.34   | 2.1   | 1.95   | 2.38  | 0.005807822 |
| Asa1G04196 | Glucan endo-1,3-beta-glucosidase                            | 9.79  | 8.27  | 9.64  | 9.23  | 15.23  | 27.5   | 22.62 | 21.78  | 2.36  | 0.005850434 |
| Asa6G02531 | Calponin-homology (CH) domain-containing protein            | 0.83  | 0.68  | 0.64  | 0.72  | 1.33   | 2.11   | 2.23  | 1.89   | 2.64  | 0.005865051 |
| Asa6G06457 | Ribosomal protein                                           | 7.2   | 6.64  | 7.59  | 7.14  | 14.3   | 17.91  | 15.68 | 15.96  | 2.23  | 0.005885279 |
| Asa5G02780 | Protein kinase domain-containing protein                    | 3.95  | 4.46  | 5.54  | 4.65  | 8.29   | 14.73  | 12.97 | 12     | 2.58  | 0.005919661 |
| Asa8G05736 | Unknown protein                                             | 3.67  | 3.38  | 2.65  | 3.23  | 8.2    | 8.49   | 5.85  | 7.51   | 2.32  | 0.005953996 |
| Asa4G04292 | Putative class I heat shock protein                         | 0.6   | 0.64  | 0.57  | 0.6   | 2.59   | 2.15   | 3.85  | 2.86   | 4.75  | 0.006038012 |
| Asa6G03231 | Cytochrome P450                                             | 5.28  | 4.21  | 4.5   | 4.66  | 7.63   | 11.62  | 9.58  | 9.61   | 2.06  | 0.0060519   |
| Asa6G00492 | Glucan endo-1,3-beta-glucosidase                            | 7.04  | 6.92  | 10.42 | 8.13  | 16.93  | 29.24  | 30.7  | 25.62  | 3.15  | 0.006114678 |
| Asa5G02884 | C2H2-type domain-containing protein                         | 0.62  | 0.26  | 0.32  | 0.4   | 1.53   | 1.61   | 1.19  | 1.44   | 3.61  | 0.006115532 |
| Asa8G05744 | Ubiquitin-conjugating enzyme E2 variant                     | 1.5   | 0.76  | 1.08  | 1.11  | 3.5    | 3.25   | 5.19  | 3.98   | 3.57  | 0.006177071 |
| Asa8G00368 | Subtilisin-like protease                                    | 2.08  | 0.9   | 2.47  | 1.82  | 3.5    | 5.47   | 3.95  | 4.31   | 2.37  | 0.006217066 |
| Asa2G03364 | T-complex protein 1 subunit beta                            | 42.39 | 40.06 | 42.87 | 41.77 | 70.96  | 83.73  | 96.99 | 83.89  | 2.01  | 0.006234344 |
| Asa7G03566 | DUF632 domain-containing protein                            | 0.14  | 0.18  | 0.15  | 0.16  | 0.69   | 2.89   | 2.37  | 1.98   | 12.66 | 0.006273693 |
| Asa1G01065 | Deoxyuridine 5'-triphosphate nucleotidohydrolase            | 7.15  | 3.99  | 4.35  | 5.16  | 10.71  | 13.22  | 12.54 | 12.16  | 2.35  | 0.006376476 |
| Asa2G02915 | O-methyltransferase                                         | 0.33  | 0.25  | 0.39  | 0.32  | 2.15   | 14.16  | 15.2  | 10.5   | 32.48 | 0.006379602 |
| Asa5G01862 | RNA-binding protein 1-like                                  | 0.09  | 0.23  | 0.28  | 0.2   | 0.6    | 1.23   | 0.72  | 0.85   | 4.25  | 0.006386996 |
| Asa2G05871 | Putative maternal effect embryo arrest 59-like              | 6.87  | 6.17  | 7.93  | 6.99  | 13.61  | 15.75  | 18.5  | 15.95  | 2.28  | 0.006411641 |
| Asa0G03107 | DUF4005 domain-containing protein                           | 9.18  | 8.62  | 9.8   | 9.2   | 14.63  | 24.02  | 21.85 | 20.17  | 2.19  | 0.006419285 |
| Asa6G05631 | Glyco_18 domain-containing protein                          | 0.14  | 0.16  | 0.38  | 0.23  | 0.65   | 1.2    | 0.8   | 0.88   | 3.9   | 0.006426078 |
| Asa8G05501 | Unknown protein                                             | 30.41 | 27.46 | 31.37 | 29.75 | 49.24  | 82.35  | 54.33 | 61.97  | 2.08  | 0.006463822 |
| Asa7G01037 | S-type anion channel like                                   | 0.1   | 0.08  | 0.11  | 0.1   | 0.43   | 0.78   | 0.35  | 0.52   | 5.38  | 0.006518077 |
| Asa4G04710 | protein RETICULATA-RELATED 3, chloroplastic-like            | 4.63  | 3.48  | 4.01  | 4.04  | 8.7    | 9.31   | 8.03  | 8.68   | 2.15  | 0.006522116 |
| Asa8G02339 | Putative heavy metal-associated domain, HMA                 | 0.17  | 0.14  | 0.32  | 0.21  | 1.24   | 6.14   | 3.99  | 3.79   | 18.05 | 0.006527066 |
| Asa1G00936 | HTH-type transcriptional regulator protein ptxE             | 6.31  | 5.56  | 8.93  | 6.93  | 14.33  | 31.53  | 22.8  | 22.89  | 3.3   | 0.006557685 |
| Asa1G00635 | Zinc ion binding protein                                    | 0.21  | 0.47  | 0.87  | 0.52  | 3.06   | 2.07   | 3.46  | 2.86   | 5.54  | 0.006580673 |
| Asa7G04383 | Hydrophobic protein like                                    | 37.01 | 26.81 | 35.46 | 33.09 | 119.61 | 129.72 | 212.9 | 154.08 | 4.66  | 0.006621642 |
| Asa8G04985 | BHLH domain-containing protein                              | 3.91  | 3.7   | 3.83  | 3.81  | 7.29   | 15.18  | 10.45 | 10.97  | 2.88  | 0.006652023 |
| Asa2G00516 | Unknown protein                                             | 0.68  | 0.24  | 0.78  | 0.57  | 2.19   | 3.65   | 5.23  | 3.69   | 6.51  | 0.006658667 |
| Asa8G02502 | Cinnamate-4-hydroxylase                                     | 0.44  | 0.57  | 0.79  | 0.6   | 7.35   | 3.38   | 3.51  | 4.75   | 7.91  | 0.006658667 |
| Asa6G01673 | Heat stress transcription factor B-4                        | 0.2   | 0.2   | 0.15  | 0.18  | 1.34   | 4.96   | 2.29  | 2.86   | 15.62 | 0.00666123  |

|            |                                                        |       |       |       |       |        |        |        |        |        |             |
|------------|--------------------------------------------------------|-------|-------|-------|-------|--------|--------|--------|--------|--------|-------------|
| Asa6G02532 | Calponin-homology (CH) domain-containing protein       | 1.12  | 1.02  | 1.14  | 1.09  | 1.83   | 2.59   | 2.78   | 2.4    | 2.2    | 0.006730738 |
| Asa7G01235 | U-box domain-containing protein                        | 6.05  | 5.95  | 7.3   | 6.43  | 12.64  | 14.62  | 14.04  | 13.77  | 2.14   | 0.006736833 |
| Asa7G00372 | DUF632 domain-containing protein                       | 1.27  | 1.49  | 1.5   | 1.42  | 3.08   | 4.08   | 2.45   | 3.2    | 2.26   | 0.006759322 |
| Asa1G04117 | Nuclear pore complex protein GP210                     | 5.58  | 4.7   | 5.81  | 5.36  | 9.67   | 12.93  | 14.83  | 12.48  | 2.33   | 0.006804006 |
| Asa2G07527 | Prolyl endopeptidase-like protein                      | 1.65  | 0.99  | 0.61  | 1.08  | 2.76   | 3.78   | 2.67   | 3.07   | 2.83   | 0.006826762 |
| Asa1G01839 | Aa_trans domain-containing protein                     | 0     | 0.19  | 0.09  | 0.09  | 1.38   | 9.97   | 5.36   | 5.57   | 59.68  | 0.006836383 |
| Asa6G01889 | Cytochrome P450                                        | 0.21  | 0.1   | 0.04  | 0.12  | 0.58   | 3.02   | 2.74   | 2.11   | 18.11  | 0.006848492 |
| Asa6G00580 | DNA polymerase I                                       | 3.53  | 3.56  | 3.6   | 3.56  | 7.41   | 8.35   | 5.65   | 7.14   | 2      | 0.006864955 |
| Asa5G01443 | DUF659 domain-containing protein                       | 0.23  | 0.16  | 0.11  | 0.17  | 0.76   | 3.3    | 2.87   | 2.31   | 13.86  | 0.006891846 |
| Asa0G01244 | Unknown protein                                        | 0.27  | 0.16  | 0.56  | 0.33  | 1.58   | 1.72   | 2.94   | 2.08   | 6.3    | 0.00690272  |
| Asa7G04928 | NAC domain-containing protein                          | 0.7   | 0.25  | 0.87  | 0.61  | 3.35   | 4.37   | 1.46   | 3.06   | 5.04   | 0.006904215 |
| Asa7G00349 | ubiquitin fusion degradation protein 1 homolog         | 1.08  | 1.63  | 1.55  | 1.42  | 3.01   | 4.77   | 4.93   | 4.24   | 2.98   | 0.006952762 |
| Asa0G01005 | Histone-lysine N-methyltransferase                     | 0.85  | 0.49  | 0.73  | 0.69  | 2.18   | 1.97   | 3.2    | 2.45   | 3.55   | 0.006965635 |
| Asa0G01782 | Glycosyltransferase                                    | 2.26  | 1.55  | 1.31  | 1.71  | 3.07   | 4.97   | 4.87   | 4.3    | 2.52   | 0.007006471 |
| Asa4G03459 | t-SNARE coiled-coil homology domain-containing protein | 0.04  | 0.02  | 0.07  | 0.04  | 0.32   | 6.26   | 6.91   | 4.5    | 103.77 | 0.007021273 |
| Asa6G01470 | DNA polymerase epsilon catalytic subunit A             | 34.6  | 36.81 | 45.39 | 38.93 | 297.92 | 210.61 | 485.35 | 331.29 | 8.51   | 0.007103723 |
| Asa2G04042 | Unknown protein                                        | 62.52 | 48.01 | 51.1  | 53.88 | 104    | 114.46 | 144.5  | 120.99 | 2.25   | 0.007113225 |
| Asa2G03186 | Chaperone DnaK                                         | 18.76 | 19.01 | 20.43 | 19.4  | 36.58  | 37.74  | 47.65  | 40.66  | 2.1    | 0.007188272 |
| Asa0G02908 | DNA (cytosine-5)-methyltransferase                     | 1.82  | 2.27  | 2.16  | 2.08  | 3.88   | 5.01   | 3.67   | 4.19   | 2.01   | 0.007264258 |
| Asa6G04888 | 60S ribosomal protein L17                              | 12.12 | 12.26 | 11    | 11.79 | 21.81  | 24.33  | 28.75  | 24.96  | 2.12   | 0.007275253 |
| Asa6G00809 | 2-alkenal reductase (NADP(+)-dependent)-like           | 3.27  | 2.29  | 3.31  | 2.96  | 5.82   | 10.16  | 5.85   | 7.28   | 2.46   | 0.007275608 |
| Asa6G04940 | FKS1_dom1 domain-containing protein                    | 0.31  | 0.32  | 0.3   | 0.31  | 0.64   | 0.91   | 0.66   | 0.74   | 2.38   | 0.00727672  |
| Asa7G03034 | Cyclin                                                 | 4.4   | 3.97  | 6.69  | 5.02  | 9.33   | 13.33  | 10.22  | 10.96  | 2.18   | 0.00727716  |
| Asa2G03096 | protein UPSTREAM OF FLC                                | 0.75  | 0.11  | 0.14  | 0.33  | 1.04   | 3.39   | 2.69   | 2.37   | 7.12   | 0.007379295 |
| Asa4G00286 | BRI1-associated receptor kinase                        | 0     | 0     | 0.05  | 0.02  | 0.17   | 1.29   | 1.43   | 0.96   | 57.8   | 0.007489347 |
| Asa1G01586 | CobW C-terminal domain-containing protein              | 14.32 | 13.75 | 12.56 | 13.54 | 24.33  | 26.51  | 32.26  | 27.7   | 2.05   | 0.007502814 |
| Asa0G04693 | Exocyst subunit Exo70 family protein                   | 0.32  | 0.98  | 1.11  | 0.8   | 2.5    | 3.76   | 2.9    | 3.05   | 3.8    | 0.007569745 |
| Asa5G02468 | Zinc finger CCCH domain-containing protein 53          | 4.14  | 4.59  | 5.68  | 4.8   | 10.36  | 19.88  | 11.44  | 13.89  | 2.89   | 0.007610643 |
| Asa7G02793 | 6-phosphofructo-2-kinase/fructose-2, 6-bisphosphatase  | 0.93  | 0.98  | 1.32  | 1.08  | 2.17   | 3.8    | 3.98   | 3.32   | 3.08   | 0.007627222 |
| Asa4G04877 | Condensin-2 complex subunit G2                         | 1.33  | 1.22  | 1.26  | 1.27  | 2.47   | 2.91   | 2.7    | 2.69   | 2.12   | 0.007690572 |
| Asa4G06310 | Amino acid permease                                    | 6.12  | 6.8   | 5.88  | 6.27  | 11.88  | 14.43  | 12.47  | 12.93  | 2.06   | 0.007698418 |
| Asa3G04415 | spindle and kinetochore-associated protein 1 homolog   | 0.54  | 1.2   | 1.49  | 1.08  | 2.47   | 4.87   | 3.31   | 3.55   | 3.3    | 0.007698631 |
| Asa6G05572 | Aspartic/glutamic acid-rich protein                    | 0     | 0.06  | 0.16  | 0.07  | 0.64   | 5.27   | 4.69   | 3.53   | 48.18  | 0.007745786 |
| Asa7G01158 | Sodium/hydrogen exchanger 7                            | 3.13  | 5.13  | 5.16  | 4.47  | 13.67  | 15.17  | 7.76   | 12.2   | 2.73   | 0.007771956 |
| Asa8G05500 | Putative heavy metal-associated domain, HMA            | 28.08 | 19.61 | 27.8  | 25.16 | 41.12  | 72.3   | 52     | 55.14  | 2.19   | 0.00777882  |
| Asa2G07142 | zinc_ribbon_12 domain-containing protein               | 1.68  | 1.97  | 1.92  | 1.86  | 3.78   | 8.5    | 6.23   | 6.17   | 3.32   | 0.00779119  |
| Asa4G02995 | F-box protein family                                   | 0.92  | 0.91  | 1.69  | 1.17  | 3.42   | 3.37   | 2.75   | 3.18   | 2.71   | 0.007844792 |
| Asa5G02332 | Unknown protein                                        | 4.38  | 3.4   | 4.25  | 4.01  | 8.88   | 20.93  | 13.21  | 14.34  | 3.58   | 0.007846342 |
| Asa7G05832 | Polygalacturonase                                      | 0.9   | 0.6   | 0.2   | 0.57  | 1.76   | 3.65   | 3.1    | 2.84   | 5.01   | 0.007852787 |
| Asa8G01281 | F-box domain-containing protein                        | 6.01  | 5.8   | 5.99  | 5.93  | 12.45  | 12.64  | 12.21  | 12.43  | 2.1    | 0.007861361 |
| Asa7G01657 | Holliday junction resolvase                            | 0.51  | 0.56  | 0.86  | 0.64  | 1.53   | 2.27   | 1.32   | 1.71   | 2.65   | 0.00788164  |
| Asa2G05238 | Unknown protein                                        | 9.17  | 10.84 | 8.57  | 9.53  | 24.11  | 19.8   | 27.43  | 23.78  | 2.5    | 0.007882209 |
| Asa7G05539 | Histone H3                                             | 15.91 | 12.9  | 17.59 | 15.47 | 25.43  | 44.55  | 30.89  | 33.62  | 2.17   | 0.008050415 |

|            |                                                                                        |        |        |        |        |        |        |       |        |        |             |
|------------|----------------------------------------------------------------------------------------|--------|--------|--------|--------|--------|--------|-------|--------|--------|-------------|
| Asa7G01317 | Ribonucleoside-diphosphate reductase small chain                                       | 4.47   | 4.43   | 5.23   | 4.71   | 12.16  | 13.99  | 7.11  | 11.09  | 2.35   | 0.00807171  |
| Asa6G06458 | Ribosomal protein                                                                      | 8.01   | 6.69   | 8      | 7.57   | 14.08  | 18.58  | 16.11 | 16.26  | 2.15   | 0.008074233 |
| Asa0G00527 | Cell division protein ftsZ, putative                                                   | 8.22   | 6.33   | 7.88   | 7.48   | 15.4   | 15.4   | 14.09 | 14.96  | 2      | 0.008085733 |
| Asa1G03687 | Serine/arginine rich splicing factor, putative                                         | 11.36  | 10.02  | 9.84   | 10.41  | 19.55  | 20.26  | 25.58 | 21.8   | 2.09   | 0.008196061 |
| Asa6G06010 | Polygalacturonase inhibitor                                                            | 1.32   | 1.1    | 1.73   | 1.38   | 3.77   | 3.08   | 4.21  | 3.69   | 2.67   | 0.00820847  |
| Asa8G05992 | Putative membrane-associated kinase regulator 2                                        | 0.83   | 0.56   | 0.55   | 0.65   | 1.92   | 4.64   | 5.14  | 3.9    | 6.03   | 0.008240428 |
| Asa1G04813 | Unknown protein                                                                        | 1.22   | 2.22   | 1.15   | 1.53   | 4.2    | 5.96   | 4.51  | 4.89   | 3.2    | 0.008244649 |
| Asa2G07205 | Homeobox protein knotted-1, putative                                                   | 0      | 0.11   | 0.15   | 0.09   | 0.59   | 1.34   | 0.52  | 0.82   | 9.42   | 0.008295887 |
| Asa7G03309 | AB hydrolase-1 domain-containing protein                                               | 0.05   | 0.15   | 0.12   | 0.11   | 0.9    | 0.87   | 0.94  | 0.9    | 8.47   | 0.008310618 |
| Asa2G03215 | Unknown protein                                                                        | 16.25  | 13.16  | 12.69  | 14.03  | 32.33  | 25.7   | 35.64 | 31.22  | 2.22   | 0.008343665 |
| Asa6G01464 | ZF-HD dimerization-type domain-containing protein                                      | 0.36   | 0.29   | 0.52   | 0.39   | 2.24   | 3.44   | 1.08  | 2.25   | 5.78   | 0.008343665 |
| Asa0G04572 | Glutathione S-transferase                                                              | 6.33   | 6.7    | 9.34   | 7.46   | 17.38  | 42.92  | 38.19 | 32.83  | 4.4    | 0.008343665 |
| Asa2G02832 | AAI domain-containing protein                                                          | 0      | 0      | 0      | 0      | 0.31   | 2.78   | 1.67  | 1.59   | 158.67 | 0.008349509 |
| Asa7G01454 | Kinase, putative                                                                       | 1.51   | 1.65   | 2.18   | 1.78   | 3.46   | 6.34   | 6.27  | 5.36   | 3.01   | 0.00839988  |
| Asa5G01393 | GDSL esterase/lipase                                                                   | 0.04   | 0.13   | 0.25   | 0.14   | 0.81   | 5.76   | 4.41  | 3.66   | 26.14  | 0.008445476 |
| Asa3G01819 | Unknown protein                                                                        | 5.85   | 6.75   | 5.23   | 5.94   | 16.78  | 14.22  | 15.06 | 15.35  | 2.58   | 0.008469519 |
| Asa7G03939 | Midasin                                                                                | 4.41   | 3.03   | 4.74   | 4.06   | 10     | 9.68   | 9.26  | 9.65   | 2.38   | 0.008561072 |
| Asa7G07200 | MFS domain-containing protein                                                          | 0.24   | 0.22   | 0.54   | 0.33   | 1.06   | 3.17   | 3.01  | 2.41   | 7.24   | 0.008577882 |
| Asa3G03608 | AAA domain-containing protein                                                          | 0.27   | 0.19   | 0.23   | 0.23   | 0.92   | 2.51   | 3.04  | 2.16   | 9.38   | 0.008577882 |
| Asa6G05511 | Lipase                                                                                 | 0.49   | 0.64   | 0.67   | 0.6    | 1.95   | 1.47   | 2.41  | 1.94   | 3.24   | 0.008577882 |
| Asa1G02789 | Replication protein A 32 kDa subunit A                                                 | 12.61  | 13.74  | 15.72  | 14.02  | 23.21  | 30.73  | 30    | 27.98  | 2      | 0.008577882 |
| Asa2G01603 | ATP-dependent DNA helicase                                                             | 0.92   | 0.97   | 1.37   | 1.09   | 1.91   | 3.57   | 2.71  | 2.73   | 2.51   | 0.008578218 |
| Asa7G05876 | Ribosomal protein L19                                                                  | 116.26 | 109.51 | 105.16 | 110.31 | 194.98 | 217.28 | 263.5 | 225.25 | 2.04   | 0.008610995 |
| Asa4G03709 | Histone-lysine N-methyltransferase, H3 lysine-9 specific                               | 0.46   | 0.31   | 0.49   | 0.42   | 1.19   | 1.96   | 2.58  | 1.91   | 4.55   | 0.008651932 |
| Asa5G05999 | Uracil-DNA glycosylase                                                                 | 3.45   | 3.29   | 3.94   | 3.56   | 7.13   | 7.48   | 9.45  | 8.02   | 2.25   | 0.008709422 |
| Asa1G03532 | Sorghum bicolor protein targeted either to mitochondria or chloroplast proteins T50848 | 2.14   | 1.97   | 1.39   | 1.83   | 11.22  | 6.35   | 5.78  | 7.78   | 4.25   | 0.008770319 |
| Asa7G00231 | Receptor-like serine/threonine-protein kinase                                          | 2.56   | 2.21   | 2.46   | 2.41   | 4.46   | 5.57   | 4.48  | 4.84   | 2.01   | 0.008796995 |
| Asa2G06653 | centromere protein C-like                                                              | 0.9    | 1.02   | 1.08   | 1      | 2.13   | 4.76   | 3.02  | 3.3    | 3.3    | 0.008797995 |
| Asa1G02572 | DNA polymerase                                                                         | 1.56   | 1.27   | 1.89   | 1.57   | 3.06   | 6.35   | 4.11  | 4.51   | 2.86   | 0.00880786  |
| Asa7G03465 | Protein kinase                                                                         | 2.81   | 2.68   | 2.87   | 2.79   | 5.02   | 6.75   | 5.64  | 5.8    | 2.08   | 0.008816201 |
| Asa8G02509 | Cinnamate 4-hydroxylase                                                                | 0.23   | 0.93   | 1.32   | 0.83   | 8.42   | 4.18   | 4.21  | 5.6    | 6.78   | 0.008816201 |
| Asa2G02257 | hippocampus abundant transcript-like protein 1                                         | 0      | 0.03   | 0      | 0.01   | 0.43   | 0.27   | 0.24  | 0.31   | 31.33  | 0.008891879 |
| Asa8G01277 | F-box domain-containing protein                                                        | 7.6    | 7.3    | 7.28   | 7.39   | 15.02  | 14.69  | 16.39 | 15.37  | 2.08   | 0.00895126  |
| Asa4G04340 | Pyrroline-5-carboxylate reductase                                                      | 5.62   | 6.78   | 7.3    | 6.57   | 13.78  | 15.11  | 12.76 | 13.88  | 2.11   | 0.009003925 |
| Asa5G03681 | VOC domain-containing protein                                                          | 9.88   | 7.81   | 13.93  | 10.54  | 19.96  | 42.08  | 33    | 31.68  | 3.01   | 0.009105879 |
| Asa5G02803 | Peroxidase                                                                             | 4.7    | 5.65   | 6.77   | 5.71   | 24.31  | 13.32  | 20.2  | 19.28  | 3.38   | 0.009195526 |
| Asa5G01656 | C2H2-type domain-containing protein                                                    | 3.76   | 1.17   | 2      | 2.31   | 9.92   | 34.98  | 17.24 | 20.71  | 8.97   | 0.009214074 |
| Asa2G03123 | putative G3BP-like protein                                                             | 20.61  | 16.55  | 19.02  | 18.73  | 34.49  | 37.94  | 47.5  | 39.98  | 2.13   | 0.009267603 |
| Asa1G04570 | ATP-dependent RNA helicase                                                             | 1.55   | 1.59   | 1.86   | 1.67   | 3.4    | 4.29   | 3.21  | 3.63   | 2.18   | 0.00933218  |
| Asa7G04063 | Flowering locus K domain-containing protein                                            | 1.29   | 0.93   | 1.76   | 1.33   | 2.96   | 4      | 2.18  | 3.05   | 2.3    | 0.009345665 |
| Asa2G07058 | Cyclin D3                                                                              | 1.45   | 1.11   | 2.69   | 1.75   | 5.55   | 14.77  | 7.84  | 9.39   | 5.36   | 0.009403862 |
| Asa7G00493 | Carboxyl methyltransferase                                                             | 0.9    | 0.65   | 0.92   | 0.82   | 1.71   | 3.18   | 1.74  | 2.21   | 2.68   | 0.00948169  |
| Asa5G02700 | FMN-binding split barrel                                                               | 6.46   | 5.31   | 6.89   | 6.22   | 11.12  | 13.83  | 12.78 | 12.58  | 2.02   | 0.009539277 |

|            |                                                          |       |       |       |       |        |        |        |        |        |             |
|------------|----------------------------------------------------------|-------|-------|-------|-------|--------|--------|--------|--------|--------|-------------|
| Asa0G05839 | NUC173 domain-containing protein                         | 9.73  | 10.15 | 10.83 | 10.24 | 17.91  | 20.04  | 23.49  | 20.48  | 2      | 0.009572849 |
| Asa6G00330 | NB-ARC domain disease resistance protein, putative       | 1.41  | 1.2   | 0.96  | 1.19  | 5.16   | 8.44   | 3      | 5.53   | 4.65   | 0.009572983 |
| Asa2G06209 | Kelch repeat-containing protein                          | 0.58  | 0.65  | 0.82  | 0.68  | 1.9    | 1.84   | 2.32   | 2.02   | 2.96   | 0.009652949 |
| Asa7G03141 | Hexosyltransferase                                       | 0.95  | 0.94  | 0.69  | 0.86  | 1.63   | 3.35   | 2.93   | 2.64   | 3.07   | 0.009654503 |
| Asa6G03312 | ras GTPase-activating protein-binding protein 2-like     | 6.36  | 6.5   | 6.49  | 6.45  | 13.39  | 24.69  | 26.56  | 21.55  | 3.34   | 0.009707854 |
| Asa5G04479 | RNA polymerase II transcriptional coactivator            | 0.13  | 0.44  | 0.59  | 0.39  | 1.43   | 4.13   | 4.15   | 3.24   | 8.37   | 0.009711074 |
| Asa7G06333 | Kinesin-like protein                                     | 0.54  | 0.67  | 0.65  | 0.62  | 1.1    | 2.19   | 1.65   | 1.65   | 2.66   | 0.009738751 |
| Asa0G02600 | Receptor-like serine/threonine-protein kinase            | 8.69  | 12.11 | 7.77  | 9.52  | 22.89  | 17.97  | 20.68  | 20.51  | 2.15   | 0.00981882  |
| Asa3G02581 | Dihydroflavonol 4-reductase                              | 0.88  | 0.32  | 0.93  | 0.71  | 3.3    | 3.19   | 2.39   | 2.96   | 4.17   | 0.00989691  |
| Asa2G05794 | Transmembrane protein                                    | 0.07  | 0     | 0.06  | 0.04  | 0.18   | 6.94   | 5.11   | 4.08   | 94.08  | 0.009973984 |
| Asa1G02738 | Metal transporter                                        | 0     | 0.01  | 0     | 0     | 0.12   | 0.33   | 0.18   | 0.21   | 63     | 0.009980265 |
| Asa4G00985 | Putative transcription factor bHLH family                | 15.21 | 12.55 | 24.21 | 17.32 | 42.42  | 73.44  | 37.24  | 51.03  | 2.95   | 0.010103492 |
| Asa6G02688 | Auxin-responsive protein                                 | 8.84  | 10.42 | 12.4  | 10.55 | 18.74  | 31.51  | 19.92  | 23.39  | 2.22   | 0.010209965 |
| Asa5G05337 | MYB transcription factor                                 | 0.33  | 0.3   | 0.18  | 0.27  | 0.88   | 2.87   | 1.77   | 1.84   | 6.81   | 0.010218722 |
| Asa1G00941 | HTH-type transcriptional regulator protein ptxE          | 1.63  | 1.24  | 1.71  | 1.53  | 4.58   | 14.95  | 9.28   | 9.6    | 6.29   | 0.010229605 |
| Asa7G06956 | Receptor-like protein kinase                             | 0     | 0     | 0     | 0     | 0.05   | 0.85   | 0.39   | 0.43   | 43     | 0.01024148  |
| Asa2G00294 | Histone H3                                               | 4.67  | 4.34  | 4.75  | 4.59  | 9.93   | 25.87  | 19.45  | 18.42  | 4.02   | 0.010257319 |
| Asa6G06767 | AP2-like ethylene-responsive transcription factor ANT    | 0.03  | 0     | 0     | 0.01  | 0.03   | 3.68   | 1.97   | 1.89   | 189.33 | 0.01031242  |
| Asa5G01929 | Glycosyltransferase                                      | 0.27  | 0.12  | 0.23  | 0.21  | 1.22   | 3.22   | 4.73   | 3.06   | 14.79  | 0.010345884 |
| Asa7G01535 | Mechanosensitive ion channel protein                     | 0.04  | 0     | 0.04  | 0.03  | 0.18   | 0.74   | 0.34   | 0.42   | 15.75  | 0.010346982 |
| Asa6G02632 | Subtilisin-like protease                                 | 1.52  | 1.48  | 1.75  | 1.58  | 3.13   | 3.65   | 2.9    | 3.23   | 2.04   | 0.010349499 |
| Asa1G01520 | putative axial regulator YABBY 2                         | 0.59  | 0.64  | 0.75  | 0.66  | 2.84   | 10.01  | 5.25   | 6.03   | 9.14   | 0.010378422 |
| Asa7G02371 | FMN hydroxy acid dehydrogenase domain-containing protein | 24.29 | 25.08 | 24.19 | 24.52 | 59.97  | 55.34  | 81.87  | 65.73  | 2.68   | 0.010385462 |
| Asa5G02413 | Wound-responsive family protein                          | 15.54 | 23.75 | 11.8  | 17.03 | 38.41  | 53.02  | 62     | 51.14  | 3      | 0.010406309 |
| Asa7G01872 | Casein kinase II subunit beta                            | 8.67  | 8.5   | 8.63  | 8.6   | 19.05  | 21.26  | 14.72  | 18.34  | 2.13   | 0.010445219 |
| Asa5G05018 | Unknown protein                                          | 1.47  | 1.51  | 1.61  | 1.53  | 4.1    | 4.23   | 3.84   | 4.06   | 2.65   | 0.010459155 |
| Asa2G06801 | Homeobox-leucine zipper protein                          | 0.64  | 0.41  | 1.23  | 0.76  | 1.53   | 2.22   | 2      | 1.92   | 2.52   | 0.010530188 |
| Asa2G04497 | FMN hydroxy acid dehydrogenase domain-containing protein | 17.77 | 14.92 | 23.35 | 18.68 | 38.89  | 43.05  | 56.17  | 46.04  | 2.46   | 0.010536954 |
| Asa1G04151 | RanBP2-type zinc finger protein                          | 4.52  | 4.25  | 4.09  | 4.29  | 8.79   | 10.27  | 13.45  | 10.84  | 2.53   | 0.010544547 |
| Asa4G01025 | pre-mRNA-splicing factor ISY1 homolog                    | 3.54  | 3.08  | 3.2   | 3.27  | 5.85   | 9.03   | 5.49   | 6.79   | 2.07   | 0.010587862 |
| Asa5G05386 | Glutamyl-tRNA(Gln) amidotransferase subunit A            | 0.03  | 0.07  | 0.02  | 0.04  | 0.86   | 0.71   | 1.98   | 1.18   | 29.58  | 0.010598287 |
| Asa6G06260 | protein SUPPRESSOR OF GENE SILENCING 3 homolog           | 3.92  | 4.7   | 5.13  | 4.58  | 10.22  | 10.16  | 9.58   | 9.99   | 2.18   | 0.010609325 |
| Asa7G00653 | RING-type domain-containing protein                      | 5.27  | 6.17  | 5.92  | 5.79  | 10.53  | 13.95  | 16.2   | 13.56  | 2.34   | 0.010632771 |
| Asa8G00457 | Glutamate--tRNA ligase                                   | 2.19  | 1.68  | 1.74  | 1.87  | 3.58   | 4.03   | 4.14   | 3.92   | 2.09   | 0.010713197 |
| Asa4G03330 | elongation factor 1-delta-like                           | 90.03 | 73.48 | 75.3  | 79.6  | 174.35 | 235.87 | 305.98 | 238.73 | 3      | 0.010763028 |
| Asa1G00490 | Protein arginine N-methyltransferase                     | 19.52 | 18.1  | 20.27 | 19.3  | 32.66  | 38.55  | 45.57  | 38.93  | 2.02   | 0.011005797 |
| Asa8G04852 | Non-specific serine/threonine protein kinase             | 16.58 | 16.71 | 21.13 | 18.14 | 28.71  | 46.02  | 43.18  | 39.3   | 2.17   | 0.011037404 |
| Asa5G04160 | Unknown protein                                          | 32.16 | 28.36 | 35.48 | 32    | 73.49  | 108.15 | 52.74  | 78.13  | 2.44   | 0.011051212 |
| Asa5G03884 | Unknown protein                                          | 1.44  | 1.02  | 0.89  | 1.12  | 3.71   | 3.13   | 2.79   | 3.21   | 2.87   | 0.011077383 |
| Asa7G00882 | F-box domain-containing protein                          | 0.78  | 0.74  | 0.59  | 0.7   | 1.52   | 3.24   | 2.17   | 2.31   | 3.28   | 0.011121849 |
| Asa7G05449 | ThiF domain-containing protein                           | 1.98  | 2.87  | 3.12  | 2.66  | 4.58   | 7.43   | 6.62   | 6.21   | 2.34   | 0.01114343  |
| Asa0G05866 | BURP domain-containing protein                           | 0.91  | 1.89  | 1.34  | 1.38  | 3.43   | 4.47   | 5.67   | 4.52   | 3.28   | 0.011156646 |

|            |                                                                      |        |        |        |        |        |         |         |        |       |             |
|------------|----------------------------------------------------------------------|--------|--------|--------|--------|--------|---------|---------|--------|-------|-------------|
| Asa2G02645 | electron protein%2C putative (Protein of unknown function%2C DUF547) | 2.02   | 2.3    | 2.41   | 2.24   | 5.08   | 5.68    | 3.21    | 4.66   | 2.08  | 0.011170732 |
| Asa6G05384 | ABC transporter B family member 2                                    | 2.55   | 2.3    | 2.62   | 2.49   | 4.8    | 6.7     | 8.07    | 6.52   | 2.62  | 0.011202138 |
| Asa2G04103 | Receptor-like serine/threonine-protein kinase                        | 0.19   | 0.22   | 0.11   | 0.17   | 0.57   | 0.6     | 0.73    | 0.63   | 3.65  | 0.011248079 |
| Asa3G04033 | DNA helicase                                                         | 3.05   | 2.89   | 3.63   | 3.19   | 9.55   | 25.02   | 27.89   | 20.82  | 6.53  | 0.011256858 |
| Asa3G03558 | DUF4005 domain-containing protein                                    | 0.24   | 0.25   | 0.18   | 0.22   | 0.79   | 1.33    | 1.87    | 1.33   | 5.96  | 0.011284697 |
| Asa3G02228 | Kinesin motor domain-containing protein                              | 2.8    | 2.05   | 2.53   | 2.46   | 5.34   | 5.57    | 4.9     | 5.27   | 2.14  | 0.01131279  |
| Asa3G02050 | Uridine kinase                                                       | 1.97   | 1.82   | 2.46   | 2.08   | 4.26   | 5.57    | 4.68    | 4.84   | 2.32  | 0.011428531 |
| Asa8G04490 | protein CPR-5                                                        | 0.62   | 0.48   | 1.13   | 0.74   | 1.88   | 2.16    | 1.38    | 1.81   | 2.43  | 0.011461683 |
| Asa6G02018 | Glucan endo-1,3-beta-glucosidase                                     | 0.53   | 0.38   | 0.3    | 0.4    | 3.16   | 2.06    | 5.08    | 3.43   | 8.51  | 0.011472528 |
| Asa8G02328 | Phospho-2-dehydro-3-deoxyheptonate aldolase                          | 21.15  | 24.12  | 35.52  | 26.93  | 66     | 69.1    | 97.36   | 77.49  | 2.88  | 0.011515429 |
| Asa5G04201 | Unknown protein                                                      | 28.22  | 18.37  | 18.84  | 21.81  | 44.09  | 47.39   | 44.02   | 45.17  | 2.07  | 0.011517308 |
| Asa8G02423 | Putative zinc finger protein                                         | 7.29   | 6.39   | 6.51   | 6.73   | 11.44  | 15.67   | 17.73   | 14.95  | 2.22  | 0.011574573 |
| Asa7G03950 | WD_REPEATS_REGION domain-containing protein                          | 2.15   | 1.38   | 1.89   | 1.81   | 4.28   | 4.37    | 3.22    | 3.96   | 2.19  | 0.011632428 |
| Asa2G02886 | Kinase family protein                                                | 0.31   | 0.09   | 0.27   | 0.22   | 0.79   | 0.79    | 0.76    | 0.78   | 3.49  | 0.011662131 |
| Asa2G01454 | 70 kDa heat shock protein                                            | 255.83 | 224.16 | 284.63 | 254.87 | 496.06 | 1059.25 | 1010.93 | 855.41 | 3.36  | 0.011698955 |
| Asa8G06138 | alpha-glucan water dikinase, chloroplastic                           | 3.34   | 2.87   | 2.56   | 2.92   | 6.37   | 8.87    | 5.13    | 6.79   | 2.32  | 0.011708366 |
| Asa7G04044 | TOG domain-containing protein                                        | 0.34   | 0.45   | 0.57   | 0.45   | 1      | 1.83    | 2.02    | 1.62   | 3.57  | 0.011731031 |
| Asa1G01320 | Cation-transporting ATPase                                           | 30.87  | 25.17  | 26.88  | 27.64  | 50.59  | 61.38   | 75.63   | 62.53  | 2.26  | 0.011793766 |
| Asa3G02784 | Microtubule-associated protein                                       | 3.48   | 2.83   | 3.53   | 3.28   | 9.6    | 19.96   | 8.94    | 12.83  | 3.91  | 0.011881722 |
| Asa3G01591 | Peroxidase                                                           | 0.19   | 0.11   | 0.14   | 0.15   | 0.69   | 4.25    | 3.36    | 2.77   | 18.86 | 0.011891265 |
| Asa7G01243 | DUF4005 domain-containing protein                                    | 2.08   | 2.27   | 3.16   | 2.5    | 4.57   | 6.36    | 5.07    | 5.33   | 2.13  | 0.011931909 |
| Asa8G03921 | rRNA adenine N(6)-methyltransferase                                  | 5.05   | 4.05   | 4.84   | 4.65   | 10.1   | 11.23   | 15.5    | 12.28  | 2.64  | 0.01196924  |
| Asa8G01374 | Diacylglycerol O-acyltransferase 3                                   | 26.14  | 18.66  | 14.15  | 19.65  | 52.28  | 40.97   | 60.68   | 51.31  | 2.61  | 0.011975015 |
| Asa6G05391 | probable transcription factor KAN2                                   | 1.64   | 0.45   | 1.38   | 1.16   | 3.16   | 12.14   | 9.51    | 8.27   | 7.15  | 0.012097367 |
| Asa7G03968 | Coiled-coil protein                                                  | 1.01   | 0.69   | 1.37   | 1.02   | 4.29   | 2.42    | 2.94    | 3.22   | 3.14  | 0.012118567 |
| Asa4G00495 | Omega-hydroxypalmitate O-feruloyl transferase                        | 0.69   | 0.56   | 0.56   | 0.6    | 1.87   | 1.88    | 1.95    | 1.9    | 3.15  | 0.012195304 |
| Asa7G01431 | Heat shock transcription factor                                      | 0.89   | 0.72   | 0.89   | 0.83   | 2.55   | 3.4     | 3.01    | 2.99   | 3.58  | 0.012217018 |
| Asa8G05484 | Protein DETOXIFICATION                                               | 10.77  | 11.11  | 11.86  | 11.25  | 21.48  | 24.5    | 30.08   | 25.35  | 2.25  | 0.012236599 |
| Asa5G03408 | FLZ-type domain-containing protein                                   | 12.77  | 15.44  | 15.37  | 14.53  | 29.51  | 35.73   | 25.74   | 30.33  | 2.09  | 0.01231849  |
| Asa5G01452 | Serine carboxypeptidase family protein, expressed                    | 1      | 0.43   | 0.6    | 0.68   | 1.49   | 2.09    | 2.61    | 2.06   | 3.05  | 0.012322342 |
| Asa8G02343 | Putative heavy metal-associated domain, HMA                          | 13.3   | 10.57  | 13.93  | 12.6   | 26.87  | 71.88   | 50.7    | 49.82  | 3.95  | 0.01234305  |
| Asa3G04851 | Unknown protein                                                      | 32.2   | 27.95  | 36.88  | 32.34  | 73.82  | 63.09   | 61.75   | 66.22  | 2.05  | 0.01234305  |
| Asa3G02916 | PREDICTED: lysine-specific demethylase JMJ25                         | 1.21   | 1.38   | 1.59   | 1.39   | 3.53   | 3.37    | 3.37    | 3.42   | 2.46  | 0.012524586 |
| Asa0G04737 | MADS box transcription factor                                        | 0.21   | 0.44   | 0.21   | 0.29   | 2.3    | 11.33   | 5.2     | 6.28   | 21.9  | 0.012535918 |
| Asa4G02983 | UDP-glycosyltransferase                                              | 0.71   | 0.76   | 0.9    | 0.79   | 1.55   | 2.28    | 2.18    | 2      | 2.54  | 0.01254348  |
| Asa5G00990 | Receptor-like protein kinase                                         | 1.07   | 1.54   | 1.4    | 1.34   | 2.68   | 4.91    | 2.9     | 3.5    | 2.62  | 0.012577663 |
| Asa6G04146 | Seipin                                                               | 0      | 0.08   | 0      | 0.03   | 0.36   | 0.44    | 0.52    | 0.44   | 16.5  | 0.012647823 |
| Asa6G01356 | AT-hook motif nuclear-localized protein                              | 0.22   | 0      | 0      | 0.07   | 0.41   | 2.7     | 1.83    | 1.65   | 22.45 | 0.01283732  |
| Asa1G02640 | Putative O-fucosyltransferase family protein-like                    | 5.05   | 4.25   | 4.39   | 4.56   | 8.27   | 9.38    | 9.83    | 9.16   | 2.01  | 0.012873311 |
| Asa4G02795 | Rice-salt sensitive 1-like protein                                   | 4.35   | 4.57   | 4.84   | 4.59   | 7.94   | 9.93    | 11.7    | 9.86   | 2.15  | 0.012873311 |
| Asa2G02716 | Protein kinase domain-containing protein                             | 0.07   | 0.08   | 0.47   | 0.21   | 0.68   | 1.94    | 1.24    | 1.29   | 6.23  | 0.012891812 |
| Asa7G06671 | RecA family protein                                                  | 0.43   | 0.59   | 0.69   | 0.57   | 1.11   | 2.09    | 1.63    | 1.61   | 2.82  | 0.012981611 |

|            |                                                                                            |       |       |       |       |       |        |        |        |        |             |
|------------|--------------------------------------------------------------------------------------------|-------|-------|-------|-------|-------|--------|--------|--------|--------|-------------|
| Asa4G05892 | Regulator of chromosome condensation (RCC1) family protein                                 | 4.67  | 3.74  | 3.97  | 4.13  | 7.26  | 8.76   | 8.94   | 8.32   | 2.02   | 0.013000935 |
| Asa8G01587 | Reticulon-like protein                                                                     | 0     | 0.02  | 0     | 0.01  | 0.18  | 1.7    | 0.83   | 0.9    | 135.5  | 0.013045985 |
| Asa6G00822 | Polygalacturonase inhibitor                                                                | 14.09 | 18.93 | 10.71 | 14.58 | 36.85 | 46.43  | 63     | 48.76  | 3.35   | 0.013115094 |
| Asa5G04999 | Putative methyltransferase C9orf114                                                        | 3.83  | 2.98  | 3.67  | 3.49  | 6.21  | 9.04   | 10.35  | 8.53   | 2.44   | 0.013200078 |
| Asa4G04878 | Condensin-2 complex subunit G2                                                             | 1.49  | 1.23  | 1.27  | 1.33  | 2.5   | 2.84   | 2.82   | 2.72   | 2.05   | 0.013217689 |
| Asa3G02987 | Receptor-like serine/threonine-protein kinase                                              | 12.19 | 14.53 | 11.46 | 12.73 | 32    | 23.19  | 23.26  | 26.15  | 2.05   | 0.0132224   |
| Asa6G00407 | Redox-regulatory protein FAM213A                                                           | 10.48 | 9.43  | 8.93  | 9.61  | 20.97 | 17.09  | 20.49  | 19.52  | 2.03   | 0.013306584 |
| Asa1G04159 | Putative protodermal factor 1                                                              | 1.47  | 0.16  | 0.6   | 0.74  | 1.31  | 93.89  | 135.51 | 76.9   | 103.46 | 0.013306965 |
| Asa4G01267 | Protein POLYCHOME-like                                                                     | 0.06  | 0     | 0     | 0.02  | 0.16  | 0.92   | 0.92   | 0.67   | 33.33  | 0.013572817 |
| Asa3G00825 | Unknown protein                                                                            | 11.68 | 10.95 | 8.77  | 10.47 | 25.02 | 25.35  | 24.2   | 24.86  | 2.37   | 0.013572817 |
| Asa0G05363 | Squalene monooxygenase 2                                                                   | 11.21 | 11.69 | 10.39 | 11.1  | 22.26 | 21.55  | 25.49  | 23.1   | 2.08   | 0.01364168  |
| Asa8G03065 | Ribonucleoprotein                                                                          | 17.84 | 17.45 | 19.46 | 18.25 | 41    | 57.85  | 28.33  | 42.39  | 2.32   | 0.013648976 |
| Asa6G00329 | Unknown protein                                                                            | 2.99  | 1.6   | 2.04  | 2.21  | 9.33  | 14.4   | 4.82   | 9.52   | 4.31   | 0.013660647 |
| Asa5G03859 | Origin recognition complex subunit 3                                                       | 0.76  | 0.65  | 0.88  | 0.76  | 1.5   | 2.3    | 1.96   | 1.92   | 2.52   | 0.013730717 |
| Asa8G00277 | Receptor protein kinase                                                                    | 1.09  | 0.81  | 1.1   | 1     | 2.36  | 3.72   | 1.74   | 2.61   | 2.61   | 0.01376738  |
| Asa7G04275 | F-box domain-containing protein                                                            | 1.56  | 0.83  | 1.1   | 1.16  | 3.49  | 3.56   | 2.37   | 3.14   | 2.7    | 0.01376771  |
| Asa2G05917 | DNA topoisomerase 2                                                                        | 0.07  | 0.17  | 0.11  | 0.12  | 26.29 | 7.9    | 5.31   | 13.17  | 112.86 | 0.013873046 |
| Asa8G04573 | Acyl-CoA N-acyltransferase with RING/FYVE/PHD-type zinc finger protein, putative isoform 1 | 0.64  | 0.66  | 0.65  | 0.65  | 1.57  | 4.7    | 3.19   | 3.15   | 4.85   | 0.013884461 |
| Asa7G03384 | Pentatricopeptide repeat-containing protein                                                | 0.51  | 0.45  | 0.7   | 0.55  | 1.01  | 1.6    | 1.62   | 1.41   | 2.55   | 0.013886548 |
| Asa7G00327 | Putative glutathione S-transferase                                                         | 0.98  | 0.84  | 1.74  | 1.19  | 3.77  | 16.01  | 11.09  | 10.29  | 8.67   | 0.013917381 |
| Asa0G03862 | Glucose-1-phosphate adenylyltransferase                                                    | 0.93  | 1.7   | 1.16  | 1.26  | 2.38  | 3.48   | 3.05   | 2.97   | 2.35   | 0.013923187 |
| Asa8G05583 | Ribosomal RNA small subunit methyltransferase NEP1                                         | 4.94  | 4.74  | 6.38  | 5.35  | 10    | 13.44  | 8.77   | 10.74  | 2.01   | 0.013979557 |
| Asa8G05211 | Amino acid transporter                                                                     | 1.13  | 0.73  | 1.03  | 0.96  | 1.76  | 2.53   | 2.31   | 2.2    | 2.28   | 0.013992411 |
| Asa8G02624 | 50S ribosomal protein L1                                                                   | 1.32  | 1.02  | 2.32  | 1.55  | 3.21  | 4.19   | 4.89   | 4.1    | 2.64   | 0.014006859 |
| Asa1G00099 | Protein kinase domain                                                                      | 14.26 | 12.79 | 14.27 | 13.77 | 25.64 | 26.13  | 33.95  | 28.57  | 2.07   | 0.014019985 |
| Asa8G05546 | ZF-HD dimerization-type domain-containing protein                                          | 2.11  | 1.73  | 2.85  | 2.23  | 4.76  | 12.54  | 8.49   | 8.6    | 3.86   | 0.014019985 |
| Asa3G01548 | Nop domain-containing protein                                                              | 46.03 | 44.14 | 45.8  | 45.32 | 84.04 | 114.96 | 138.28 | 112.43 | 2.48   | 0.014037491 |
| Asa5G04224 | DUF2428 domain-containing protein                                                          | 1.03  | 1.11  | 1.79  | 1.31  | 3.38  | 3.45   | 2.19   | 3.01   | 2.3    | 0.014180123 |
| Asa6G04199 | DNA polymerase alpha subunit B                                                             | 0.78  | 1     | 1.16  | 0.98  | 1.99  | 4.58   | 3.01   | 3.19   | 3.26   | 0.014206253 |
| Asa8G04029 | RNase III domain-containing protein                                                        | 3.59  | 5.52  | 6.1   | 5.07  | 8.62  | 13.29  | 12.44  | 11.45  | 2.26   | 0.014252413 |
| Asa7G01293 | Unknown protein                                                                            | 0.87  | 1.04  | 1.29  | 1.07  | 2.39  | 3.73   | 2.94   | 3.02   | 2.83   | 0.014262018 |
| Asa6G00827 | RBR-type E3 ubiquitin transferase                                                          | 0.81  | 0.59  | 0.57  | 0.66  | 1.27  | 2.09   | 2.07   | 1.81   | 2.76   | 0.014287873 |
| Asa4G03523 | 5-oxoprolinase                                                                             | 18.5  | 15.78 | 17.25 | 17.18 | 31.88 | 37.53  | 47.56  | 38.99  | 2.27   | 0.014359975 |
| Asa1G03439 | Endoplasmic reticulum-Golgi intermediate compartment protein 3                             | 4     | 2.65  | 3.11  | 3.25  | 5.83  | 7.07   | 6.79   | 6.56   | 2.02   | 0.01436196  |
| Asa0G04230 | RNase H domain-containing protein                                                          | 41.91 | 36.21 | 41.35 | 39.82 | 72.4  | 134.74 | 139.07 | 115.4  | 2.9    | 0.014406048 |
| Asa4G04766 | alpha N-terminal protein methyltransferase 1                                               | 7.69  | 6.18  | 6.92  | 6.93  | 13.05 | 14.24  | 16.52  | 14.6   | 2.11   | 0.014536834 |
| Asa8G05993 | Putative membrane-associated kinase regulator 2                                            | 1.77  | 3.16  | 2     | 2.31  | 4.34  | 7.35   | 6.77   | 6.15   | 2.66   | 0.014558394 |
| Asa2G07238 | Aa_trans domain-containing protein                                                         | 5.38  | 7.81  | 9.59  | 7.59  | 15.08 | 15.03  | 17.75  | 15.95  | 2.1    | 0.014606744 |
| Asa8G03000 | Stromal 70 kDa heat shock-related protein, chloroplastic                                   | 3.49  | 1.57  | 2.79  | 2.62  | 5.65  | 7.7    | 8.57   | 7.31   | 2.79   | 0.014651097 |
| Asa2G03560 | Histone H2B                                                                                | 9.21  | 9.05  | 12.68 | 10.31 | 18.11 | 31.68  | 31.86  | 27.22  | 2.64   | 0.014729844 |
| Asa1G04819 | Cyclin family protein                                                                      | 0.69  | 0.49  | 0.61  | 0.6   | 1.35  | 1.85   | 1.43   | 1.54   | 2.59   | 0.014857087 |

|            |                                                                          |        |       |        |        |        |        |        |        |        |             |
|------------|--------------------------------------------------------------------------|--------|-------|--------|--------|--------|--------|--------|--------|--------|-------------|
| Asa2G03362 | Pentatricopeptide repeat-containing protein                              | 1.12   | 1.16  | 1.07   | 1.12   | 2.56   | 3.6    | 3.08   | 3.08   | 2.76   | 0.014899109 |
| Asa7G07211 | Flap endonuclease 1                                                      | 3.76   | 3.73  | 4.28   | 3.92   | 8.76   | 8.24   | 7.47   | 8.16   | 2.08   | 0.014985177 |
| Asa7G04929 | factor of DNA methylation 1-like                                         | 6.8    | 7.15  | 7.41   | 7.12   | 12.34  | 16.43  | 19.1   | 15.96  | 2.24   | 0.014988146 |
| Asa2G03371 | RNA binding protein                                                      | 155.73 | 154.3 | 156.88 | 155.64 | 253.26 | 335.76 | 377.53 | 322.18 | 2.07   | 0.01503245  |
| Asa2G06578 | Plasma membrane ATPase                                                   | 1.75   | 1.96  | 2.16   | 1.96   | 3.95   | 3.76   | 4.76   | 4.16   | 2.12   | 0.015050443 |
| Asa1G03467 | Formin-like protein 18                                                   | 1.05   | 1.1   | 0.8    | 0.98   | 2.96   | 4.07   | 2.97   | 3.33   | 3.39   | 0.015080354 |
| Asa8G04360 | Remorin family protein                                                   | 0.35   | 0.2   | 0.27   | 0.27   | 1.88   | 7.93   | 3.36   | 4.39   | 16.06  | 0.015219961 |
| Asa3G02918 | lysine-specific demethylase JMJ25-like                                   | 1.56   | 1.02  | 2.09   | 1.56   | 3.7    | 4.01   | 3.27   | 3.66   | 2.35   | 0.015263911 |
| Asa7G02721 | Carboxypeptidase                                                         | 3.77   | 3.58  | 4.21   | 3.85   | 8.13   | 11.62  | 5.86   | 8.54   | 2.22   | 0.015292507 |
| Asa8G04503 | Glutathione S-transferase                                                | 63.52  | 69.91 | 76.18  | 69.87  | 158.06 | 116.32 | 144.37 | 139.58 | 2      | 0.015306832 |
| Asa0G02444 | Regulator of chromosome condensation (RCC1) family protein               | 4.94   | 5.62  | 5.83   | 5.46   | 13.84  | 14.76  | 9.74   | 12.78  | 2.34   | 0.015359089 |
| Asa2G00916 | Putative F-box protein                                                   | 0.99   | 1.37  | 1.32   | 1.23   | 3.21   | 4.43   | 2.71   | 3.45   | 2.81   | 0.015470504 |
| Asa4G05822 | Very-long-chain 3-oxoacyl-CoA reductase                                  | 8.94   | 8.11  | 12     | 9.68   | 17.74  | 18.55  | 22.74  | 19.68  | 2.03   | 0.015654449 |
| Asa6G02016 | Ubiquitin-conjugating enzyme, E2                                         | 0.06   | 0.03  | 0      | 0.03   | 0      | 5.04   | 5.73   | 3.59   | 119.67 | 0.015698608 |
| Asa7G06087 | Peptidase_S24 domain-containing protein                                  | 9.33   | 9.85  | 9.72   | 9.63   | 15.7   | 20.36  | 23.02  | 19.69  | 2.04   | 0.015850573 |
| Asa6G02037 | Glucan endo-1,3-beta-glucosidase                                         | 0.26   | 0.45  | 0.4    | 0.37   | 7.7    | 4.4    | 15.21  | 9.1    | 24.6   | 0.01594571  |
| Asa4G03696 | Unknown protein                                                          | 3.96   | 3.97  | 5.84   | 4.59   | 8.19   | 16.74  | 11.27  | 12.07  | 2.63   | 0.015992747 |
| Asa7G01098 | Unknown protein                                                          | 8.13   | 2.34  | 4.02   | 4.83   | 12.88  | 20.42  | 28.01  | 20.44  | 4.23   | 0.016055177 |
| Asa6G01603 | PREDICTED: argonaute                                                     | 1.12   | 1.11  | 1.22   | 1.15   | 1.8    | 3.43   | 2.45   | 2.56   | 2.23   | 0.016210304 |
| Asa1G04787 | Putative amino acid transporter, transmembrane domain-containing protein | 0.6    | 0.52  | 0.88   | 0.67   | 1.75   | 6.31   | 4.44   | 4.17   | 6.25   | 0.016210304 |
| Asa5G03323 | Myosin-M heavy protein                                                   | 0.21   | 0.28  | 0.4    | 0.3    | 1.1    | 2.23   | 0.88   | 1.4    | 4.73   | 0.016210304 |
| Asa6G03049 | Putative oxysterol binding domain family protein                         | 3.51   | 3.4   | 3.99   | 3.63   | 5.65   | 8.8    | 8.02   | 7.49   | 2.06   | 0.016323819 |
| Asa8G03410 | Checkpoint protein                                                       | 0.88   | 1.2   | 1.28   | 1.12   | 2.8    | 2.98   | 3.26   | 3.01   | 2.69   | 0.016334355 |
| Asa4G00784 | Putative ovule protein                                                   | 29.89  | 31.5  | 25.48  | 28.96  | 52.35  | 55.38  | 66.45  | 58.06  | 2.01   | 0.0163923   |
| Asa8G02587 | BTB/POZ domain-containing protein NPY1-like                              | 0.41   | 0.8   | 0.6    | 0.6    | 1.15   | 2.14   | 1.48   | 1.59   | 2.64   | 0.016535655 |
| Asa7G00330 | Glutathione S-transferase                                                | 1.44   | 0.93  | 2.66   | 1.68   | 5.09   | 21.18  | 20.46  | 15.58  | 9.29   | 0.016615049 |
| Asa2G02487 | 60S acidic ribosomal protein P1-like                                     | 4.58   | 4.39  | 5.41   | 4.79   | 8.41   | 11.96  | 10     | 10.12  | 2.11   | 0.016777902 |
| Asa5G01536 | Pentatricopeptide repeat-containing protein                              | 0.31   | 0.46  | 0.34   | 0.37   | 1.06   | 1.42   | 0.64   | 1.04   | 2.81   | 0.016810098 |
| Asa4G03005 | ULP_PROTEASE domain-containing protein                                   | 8.84   | 7.24  | 7.34   | 7.81   | 16.41  | 16.24  | 16.37  | 16.34  | 2.09   | 0.016863595 |
| Asa0G02421 | PREDICTED: ATP-dependent DNA helicase                                    | 1.34   | 1.5   | 1.83   | 1.56   | 3.29   | 8.09   | 5.01   | 5.46   | 3.51   | 0.01686533  |
| Asa5G03751 | 2-dehydro-3-deoxyphosphooctonate aldolase                                | 1.18   | 0.86  | 0.94   | 0.99   | 2.14   | 3.37   | 1.96   | 2.49   | 2.51   | 0.016891625 |
| Asa6G04139 | Succinate dehydrogenase subunit 5, mitochondrial                         | 0.15   | 0     | 0.45   | 0.2    | 1.81   | 1.51   | 2.27   | 1.86   | 9.32   | 0.016999896 |
| Asa1G04603 | Glutathione S-transferase                                                | 43.81  | 34.92 | 43.95  | 40.89  | 74.64  | 105.43 | 126.4  | 102.16 | 2.5    | 0.017052914 |
| Asa6G01957 | Ethylene insensitive 3-like protein                                      | 13.1   | 12.13 | 12.39  | 12.54  | 29.33  | 36.63  | 51.72  | 39.23  | 3.13   | 0.017105531 |
| Asa8G02686 | Myosin heavy chain-related                                               | 1.8    | 1.88  | 2.47   | 2.05   | 3.27   | 5.75   | 5.24   | 4.75   | 2.32   | 0.017186679 |
| Asa0G01207 | Ribosomal_L18e/L15P domain-containing protein                            | 0.24   | 0.14  | 0.18   | 0.19   | 1.62   | 2.12   | 0.71   | 1.48   | 7.95   | 0.017259767 |
| Asa4G01402 | PREDICTED: IQ-DOMAIN                                                     | 0      | 0.08  | 0      | 0.03   | 0.18   | 3.02   | 2.05   | 1.75   | 65.62  | 0.017442764 |
| Asa4G03892 | Lipase_3 domain-containing protein                                       | 0.12   | 0.08  | 0.02   | 0.07   | 0.25   | 1.03   | 0.66   | 0.65   | 8.82   | 0.017511946 |
| Asa1G04339 | glucan endo-1,3-beta-glucosidase 3-like                                  | 6.11   | 6.4   | 8.35   | 6.95   | 11.19  | 18.75  | 18.01  | 15.98  | 2.3    | 0.017642165 |
| Asa6G06697 | Unknown protein                                                          | 7.18   | 9.5   | 13.63  | 10.1   | 22.08  | 26.34  | 17.24  | 21.89  | 2.17   | 0.017674256 |
| Asa7G01149 | Ribonuclease 3-like protein                                              | 1.44   | 1.64  | 1.58   | 1.55   | 3.01   | 7.64   | 5.76   | 5.47   | 3.52   | 0.01769057  |
| Asa6G01959 | Ethylene insensitive 3-like protein                                      | 13.1   | 12.13 | 12.39  | 12.54  | 29.3   | 36.5   | 51.69  | 39.16  | 3.12   | 0.017751056 |
| Asa4G06072 | Tryptophan aminotransferase-related protein 4                            | 11.64  | 11.69 | 13.7   | 12.34  | 40.13  | 39.02  | 19.05  | 32.73  | 2.65   | 0.01790188  |

|            |                                                            |         |        |         |         |         |         |         |         |       |             |
|------------|------------------------------------------------------------|---------|--------|---------|---------|---------|---------|---------|---------|-------|-------------|
| Asa2G04805 | DNA (Cytosine-5-)-methyltransferase                        | 3.54    | 3.52   | 4.92    | 3.99    | 7.98    | 17.93   | 10.75   | 12.22   | 3.06  | 0.017968405 |
| Asa1G03768 | PMR5N domain-containing protein                            | 0.74    | 0.51   | 0.68    | 0.64    | 1.21    | 1.94    | 1.46    | 1.54    | 2.39  | 0.018040763 |
| Asa2G06731 | UPF0481 protein                                            | 0       | 0      | 0       | 0       | 0.13    | 1.19    | 0.86    | 0.73    | 72.67 | 0.018051161 |
| Asa5G05591 | Ribosomal protein L37                                      | 57.77   | 51.01  | 63.35   | 57.38   | 103.63  | 133.35  | 163.78  | 133.59  | 2.33  | 0.018079456 |
| Asa4G04341 | regulatory protein NPR5-like                               | 1.44    | 1.97   | 2.51    | 1.97    | 3.85    | 8.74    | 5.89    | 6.16    | 3.12  | 0.01812185  |
| Asa7G05313 | Histone H2B                                                | 0.07    | 0.15   | 0.25    | 0.16    | 2.95    | 7.07    | 15.6    | 8.54    | 54.51 | 0.018137257 |
| Asa3G04172 | MLO-like protein                                           | 50.58   | 47.93  | 54.6    | 51.04   | 103.82  | 129.06  | 171.01  | 134.63  | 2.64  | 0.018147309 |
| Asa4G00245 | BRI1-associated receptor kinase                            | 0       | 0      | 0.05    | 0.02    | 0.14    | 0.93    | 1.26    | 0.78    | 46.6  | 0.018254808 |
| Asa1G02087 | Transmembrane protein                                      | 0.21    | 0.32   | 0.27    | 0.27    | 0.87    | 20.73   | 14.42   | 12.01   | 45.03 | 0.018315135 |
| Asa6G00594 | Aldehyde dehydrogenase                                     | 37.61   | 30.44  | 44.37   | 37.47   | 94.17   | 124.63  | 179.83  | 132.88  | 3.55  | 0.018526964 |
| Asa8G02301 | NMO domain-containing protein                              | 27.59   | 27.81  | 30.88   | 28.76   | 74.3    | 80.25   | 123.1   | 92.55   | 3.22  | 0.01853384  |
| Asa0G04667 | plant cysteine oxidase 2-like                              | 8.44    | 8.12   | 5.71    | 7.42    | 13.68   | 18.98   | 22.24   | 18.3    | 2.47  | 0.018545936 |
| Asa3G02270 | Plasma membrane ATPase                                     | 7.67    | 8.05   | 8.86    | 8.19    | 18.34   | 19.67   | 14.3    | 17.44   | 2.13  | 0.018556848 |
| Asa0G01949 | protein kinase family protein                              | 1.72    | 1.9    | 2.04    | 1.89    | 3.55    | 4.67    | 4.28    | 4.17    | 2.21  | 0.018577153 |
| Asa4G01612 | Unknown protein                                            | 31.15   | 25.41  | 27.03   | 27.86   | 44.96   | 84.82   | 80.07   | 69.95   | 2.51  | 0.018596876 |
| Asa2G05310 | GDSL esterase/lipase                                       | 7.25    | 4.91   | 5.98    | 6.05    | 11.13   | 19.24   | 21.54   | 17.3    | 2.86  | 0.018657378 |
| Asa7G05624 | Annexin                                                    | 4.64    | 4.2    | 6.29    | 5.04    | 12.81   | 39.45   | 40.01   | 30.76   | 6.1   | 0.01868354  |
| Asa3G02250 | 60S acidic ribosomal protein P1-like                       | 4.66    | 4.47   | 5.41    | 4.85    | 8.41    | 12      | 10      | 10.14   | 2.09  | 0.018692443 |
| Asa6G01219 | Unknown protein                                            | 0.12    | 0.28   | 0.33    | 0.24    | 0.54    | 1.3     | 1.12    | 0.99    | 4.05  | 0.018721168 |
| Asa6G00311 | H/ACA ribonucleoprotein complex non-core subunit NAF1-like | 6.78    | 5.96   | 6.97    | 6.57    | 12.79   | 17.79   | 22.37   | 17.65   | 2.69  | 0.018731803 |
| Asa7G07584 | Tetraspanin-2                                              | 2.08    | 2.03   | 2.59    | 2.23    | 4.8     | 5.66    | 4.7     | 5.05    | 2.26  | 0.01877325  |
| Asa5G05505 | Protein translocase subunit SecA                           | 5.54    | 6.44   | 6.54    | 6.17    | 11.33   | 14.81   | 13.52   | 13.22   | 2.14  | 0.018775212 |
| Asa6G01462 | DNA polymerase epsilon catalytic subunit A                 | 18.88   | 21.26  | 23.34   | 21.16   | 163.51  | 114.31  | 291.42  | 189.75  | 8.97  | 0.018869138 |
| Asa8G02112 | Unknown protein                                            | 2.81    | 2.4    | 2.92    | 2.71    | 10.54   | 42.86   | 51.81   | 35.07   | 12.94 | 0.018880424 |
| Asa6G03296 | CRAL-TRIO domain-containing protein                        | 6.67    | 6.29   | 6.91    | 6.62    | 12.58   | 13.95   | 18.37   | 14.97   | 2.26  | 0.018906594 |
| Asa0G02686 | Remorin_C domain-containing protein                        | 3.67    | 3.36   | 3.27    | 3.43    | 5.9     | 12.24   | 11.41   | 9.85    | 2.87  | 0.018929048 |
| Asa6G01479 | Gibberellin 2-beta-dioxygenase                             | 0.55    | 0.75   | 1.02    | 0.77    | 2.48    | 1.76    | 2.92    | 2.39    | 3.09  | 0.01899534  |
| Asa4G03854 | PREDICTED: DUF674                                          | 0       | 0      | 0       | 0       | 0.26    | 1.51    | 0.63    | 0.8     | 80    | 0.019133292 |
| Asa5G05560 | Alliinase                                                  | 1098.98 | 887.77 | 1177.42 | 1054.72 | 1791.68 | 2329.41 | 2750.58 | 2290.56 | 2.17  | 0.019505669 |
| Asa8G04180 | Alcohol dehydrogenase                                      | 7.65    | 7.39   | 11.38   | 8.81    | 32.69   | 37.5    | 65.41   | 45.2    | 5.13  | 0.019712983 |
| Asa8G00317 | ethylene-responsive transcription factor                   | 3.59    | 3.39   | 3.67    | 3.55    | 6.62    | 8.91    | 10.58   | 8.7     | 2.45  | 0.019752397 |
| Asa8G03284 | Transcription factor CYCLOIDEA                             | 0.12    | 0      | 0.05    | 0.06    | 0.23    | 2.16    | 2.18    | 1.52    | 26.88 | 0.019783625 |
| Asa6G05228 | Aminopeptidase                                             | 13.17   | 10.54  | 12.95   | 12.22   | 26.33   | 24.53   | 24.35   | 25.07   | 2.05  | 0.019858444 |
| Asa5G00985 | Receptor-like protein kinase                               | 1.21    | 1.87   | 1.9     | 1.66    | 3.29    | 6.4     | 3.76    | 4.48    | 2.7   | 0.019858444 |
| Asa2G04173 | Unknown protein                                            | 2.01    | 1.22   | 2.15    | 1.79    | 3.86    | 7.47    | 3.74    | 5.02    | 2.8   | 0.019930279 |
| Asa7G04299 | Aldose 1-epimerase                                         | 8.22    | 6.14   | 6.92    | 7.09    | 12.18   | 28.68   | 21.24   | 20.7    | 2.92  | 0.019943893 |
| Asa2G02678 | Monofunctional biosynthetic peptidoglycan transglycosylase | 0.34    | 0.56   | 0.49    | 0.46    | 2       | 1.66    | 1.12    | 1.59    | 3.44  | 0.019943893 |
| Asa5G02697 | Myb family transcription factor                            | 7.69    | 6.18   | 8       | 7.29    | 14.94   | 22.8    | 28.76   | 22.17   | 3.04  | 0.019994789 |
| Asa2G05496 | Histone-lysine N-methyltransferase                         | 1.43    | 1.17   | 1.92    | 1.51    | 3.56    | 6.32    | 2.95    | 4.28    | 2.84  | 0.020097649 |
| Asa5G05019 | Micronuclear linker histone polyprotein-like protein       | 0.7     | 0.4    | 0.88    | 0.66    | 1.8     | 2.22    | 3.37    | 2.46    | 3.73  | 0.020113757 |
| Asa2G03691 | Histone H4                                                 | 2.89    | 2.89   | 3.37    | 3.05    | 5.45    | 9.84    | 7.39    | 7.56    | 2.48  | 0.020195198 |
| Asa0G03098 | Glycosyltransferase                                        | 0.06    | 0.13   | 0.11    | 0.1     | 1.19    | 6.52    | 2.3     | 3.34    | 33.37 | 0.020201548 |
| Asa5G03499 | Receptor-like protein kinase                               | 0.07    | 0.08   | 0.09    | 0.08    | 0.2     | 0.48    | 0.24    | 0.31    | 3.83  | 0.020308815 |
| Asa4G02201 | Cyclin                                                     | 0.07    | 0.21   | 0.11    | 0.13    | 0.42    | 1.46    | 0.99    | 0.96    | 7.36  | 0.020391348 |
| Asa7G05957 | Ubiquitin                                                  | 12.06   | 15.26  | 17.93   | 15.08   | 24.92   | 33.01   | 34.31   | 30.75   | 2.04  | 0.020474781 |
| Asa0G03496 | Unknown protein                                            | 2.94    | 1.5    | 1.82    | 2.09    | 8.7     | 13.68   | 4.34    | 8.91    | 4.27  | 0.020525124 |



|            |                                                                          |        |       |       |        |        |        |        |        |       |             |
|------------|--------------------------------------------------------------------------|--------|-------|-------|--------|--------|--------|--------|--------|-------|-------------|
| Asa7G00011 | Terpene cyclase/mutase family member                                     | 1.78   | 1.11  | 1.37  | 1.42   | 2.86   | 3.6    | 3.72   | 3.39   | 2.39  | 0.020530384 |
| Asa5G04992 | putative methyltransferase C9orf114                                      | 2.58   | 2.24  | 2.41  | 2.41   | 4.22   | 5.73   | 5.14   | 5.03   | 2.09  | 0.020723316 |
| Asa4G04300 | Protein EFR3                                                             | 1.68   | 1.65  | 1.69  | 1.67   | 3.36   | 9.31   | 8.11   | 6.93   | 4.14  | 0.020745831 |
| Asa3G01973 | Peroxisomal membrane protein PMP22                                       | 0.49   | 0.53  | 0.97  | 0.66   | 1.74   | 2.83   | 2.02   | 2.2    | 3.31  | 0.02076465  |
| Asa6G05931 | DNA helicase                                                             | 5.21   | 5.48  | 5.58  | 5.42   | 11.68  | 31.78  | 19.46  | 20.97  | 3.87  | 0.020815879 |
| Asa0G05531 | Beta-galactosidase                                                       | 1.94   | 2.13  | 2.52  | 2.2    | 3.72   | 4.59   | 4.96   | 4.42   | 2.01  | 0.020895322 |
| Asa6G06157 | Mitochondrial carrier-like protein                                       | 2.21   | 1.2   | 1.79  | 1.73   | 4.23   | 3.6    | 5.45   | 4.43   | 2.55  | 0.0209336   |
| Asa5G05780 | Putative amino acid transporter, transmembrane domain-containing protein | 0.44   | 0.51  | 1.2   | 0.72   | 2.2    | 8.26   | 4.8    | 5.09   | 7.1   | 0.020958282 |
| Asa4G00624 | Protein O-linked-mannose beta-1,4-N-acetylglucosaminyltransferase 2      | 0.98   | 1.28  | 1.38  | 1.21   | 3.01   | 2.49   | 3.63   | 3.04   | 2.51  | 0.021012446 |
| Asa4G03688 | Putative Heavy metal-associated domain, HMA                              | 0.32   | 0.3   | 0.81  | 0.48   | 3.01   | 2.18   | 1.64   | 2.28   | 4.78  | 0.021012446 |
| Asa1G00951 | HTH-type transcriptional regulator protein ptxE                          | 18.15  | 17.04 | 22.12 | 19.1   | 47.11  | 144.89 | 83.88  | 91.96  | 4.81  | 0.021069325 |
| Asa6G00972 | Tryptophan synthase beta chain                                           | 0.03   | 0.09  | 0.14  | 0.09   | 0.33   | 2.15   | 1.61   | 1.36   | 15.73 | 0.021093316 |
| Asa1G00274 | U4/U6 small nuclear ribonucleoprotein PRP4-like protein                  | 13.96  | 14.98 | 15.51 | 14.82  | 29.27  | 34.56  | 45.77  | 36.53  | 2.47  | 0.021233691 |
| Asa2G05647 | Putative DNA binding protein                                             | 1.41   | 1.77  | 1.03  | 1.4    | 2.74   | 5.58   | 3.39   | 3.9    | 2.78  | 0.021253143 |
| Asa6G03653 | Histone H3                                                               | 3.81   | 3.29  | 4.23  | 3.78   | 6.86   | 17.41  | 14.3   | 12.86  | 3.4   | 0.021267903 |
| Asa5G02793 | UDP-glycosyltransferase                                                  | 0.21   | 0.08  | 0     | 0.1    | 0.31   | 1.91   | 1.54   | 1.25   | 12.97 | 0.021312862 |
| Asa8G02752 | Methyltransf_11 domain-containing protein                                | 57.09  | 46.37 | 49.73 | 51.06  | 105.57 | 137.95 | 70.24  | 104.59 | 2.05  | 0.021350294 |
| Asa6G05428 | V-type proton ATPase subunit E                                           | 5.25   | 4.79  | 5.54  | 5.19   | 9.54   | 14.95  | 17.58  | 14.02  | 2.7   | 0.021471146 |
| Asa3G03435 | Exocyst subunit Exo70 family protein                                     | 0.69   | 0.74  | 0.86  | 0.76   | 1.42   | 1.94   | 2.02   | 1.79   | 2.35  | 0.021698508 |
| Asa0G05136 | Cellulose synthase                                                       | 11.7   | 12.11 | 12.65 | 12.15  | 25.14  | 29.58  | 19.64  | 24.79  | 2.04  | 0.021712491 |
| Asa2G07084 | Protein SUPPRESSOR OF K(+) TRANSPORT GROWTH DEFECT 1                     | 5.24   | 5.54  | 6.95  | 5.91   | 12.32  | 14.29  | 10.04  | 12.22  | 2.07  | 0.021717528 |
| Asa6G00825 | Polygalacturonase inhibitor                                              | 7.46   | 8.12  | 10.65 | 8.74   | 15.21  | 21.83  | 24.64  | 20.56  | 2.35  | 0.021739495 |
| Asa0G02342 | DNA double-strand break repair rad50 ATPase                              | 8.64   | 5.18  | 8.96  | 7.59   | 15.57  | 19.16  | 14.05  | 16.26  | 2.14  | 0.021745719 |
| Asa0G00253 | Unknown protein                                                          | 0.02   | 0     | 0     | 0.01   | 0.02   | 0.61   | 0.48   | 0.37   | 55.5  | 0.021853317 |
| Asa7G02189 | Squamosa promoter-binding-like protein                                   | 0      | 0     | 0     | 0      | 0      | 1      | 0.92   | 0.64   | 64    | 0.021861325 |
| Asa1G03388 | Cysteine synthase                                                        | 3.37   | 2.98  | 3.15  | 3.17   | 7.07   | 6.68   | 6.35   | 6.7    | 2.12  | 0.021885975 |
| Asa1G02604 | Unknown protein                                                          | 1.46   | 1.44  | 1.76  | 1.55   | 5.19   | 4.33   | 4.77   | 4.76   | 3.07  | 0.02192012  |
| Asa8G02172 | Phytoeyanin domain-containing protein                                    | 0.73   | 0.92  | 0.96  | 0.87   | 1.76   | 4.57   | 2.95   | 3.09   | 3.56  | 0.022036422 |
| Asa2G03398 | NUC173 domain-containing protein                                         | 10.62  | 10.19 | 10.36 | 10.39  | 16.65  | 23.09  | 25.95  | 21.9   | 2.11  | 0.022060007 |
| Asa1G01874 | MYB transcription factor                                                 | 0.77   | 0.45  | 1.32  | 0.85   | 2.14   | 3.43   | 4.57   | 3.38   | 3.99  | 0.022127612 |
| Asa2G05301 | Glycylpeptide N-tetradecanoyltransferase                                 | 1.8    | 2.07  | 2.54  | 2.14   | 3.99   | 8.62   | 5.23   | 5.95   | 2.78  | 0.022174216 |
| Asa1G01828 | Histone H3                                                               | 5.62   | 5.44  | 9.27  | 6.78   | 11.24  | 20.93  | 17.85  | 16.67  | 2.46  | 0.022196674 |
| Asa4G00978 | Putative transcription factor bHLH family                                | 0.17   | 0.1   | 0.66  | 0.31   | 1.06   | 1.68   | 0.96   | 1.23   | 3.98  | 0.022296995 |
| Asa2G02798 | Cytochrome P450                                                          | 5.96   | 4.79  | 5.27  | 5.34   | 12.49  | 14.18  | 7.16   | 11.28  | 2.11  | 0.022339332 |
| Asa1G03888 | Putative DNA binding protein                                             | 1.41   | 1.77  | 1.03  | 1.4    | 2.74   | 5.62   | 3.39   | 3.92   | 2.79  | 0.022343432 |
| Asa7G06918 | CBFD_NFYB_HMF domain-containing protein                                  | 11.48  | 10.76 | 11.9  | 11.38  | 17.34  | 25.21  | 26.81  | 23.12  | 2.03  | 0.0223487   |
| Asa2G05145 | Isochorismatase domain-containing protein                                | 11.85  | 2.42  | 5.14  | 6.47   | 24.53  | 123.94 | 160.93 | 103.13 | 15.94 | 0.022403438 |
| Asa2G06887 | Unknown protein                                                          | 1.12   | 1.07  | 0.86  | 1.02   | 2.87   | 3.53   | 2.69   | 3.03   | 2.98  | 0.022437607 |
| Asa7G03315 | GTP diphosphokinase                                                      | 0.4    | 0.21  | 0.19  | 0.27   | 0.92   | 0.86   | 0.77   | 0.85   | 3.19  | 0.022489601 |
| Asa8G03192 | Zinc finger CCCH domain-containing protein                               | 105.49 | 92.9  | 113.4 | 103.93 | 218.84 | 249.71 | 349.96 | 272.84 | 2.63  | 0.022502663 |
| Asa5G02816 | GTD-binding domain-containing protein                                    | 1.1    | 1.28  | 1.42  | 1.27   | 2.07   | 3.54   | 2.3    | 2.64   | 2.08  | 0.02254193  |
| Asa4G04639 | High affinity cationic amino acid transporter 1                          | 1.03   | 0.82  | 1.11  | 0.99   | 2.12   | 2.73   | 1.71   | 2.19   | 2.22  | 0.022650583 |
| Asa2G04806 | DNA (Cytosine-5-)-methyltransferase                                      | 2.76   | 2.94  | 3.99  | 3.23   | 6.6    | 15.39  | 8.88   | 10.29  | 3.19  | 0.022697268 |
| Asa5G00025 | 3-ketoacyl-CoA synthase                                                  | 0.54   | 0.15  | 0.31  | 0.33   | 0.96   | 1.66   | 0.68   | 1.1    | 3.3   | 0.022738754 |
| Asa3G00985 | agmatine coumaroyltransferase-2-like                                     | 0      | 0.05  | 0.27  | 0.11   | 1.09   | 0.86   | 2.12   | 1.36   | 12.72 | 0.0228234   |

|            |                                                   |       |       |       |       |        |        |         |        |       |             |
|------------|---------------------------------------------------|-------|-------|-------|-------|--------|--------|---------|--------|-------|-------------|
| Asa2G02715 | Protein kinase family protein                     | 0.2   | 0.14  | 0.18  | 0.17  | 0.59   | 3.57   | 2.29    | 2.15   | 12.4  | 0.022850131 |
| Asa1G00789 | Unknown protein                                   | 9.52  | 7.87  | 14.04 | 10.48 | 19.62  | 24.75  | 29.99   | 24.79  | 2.37  | 0.022853607 |
| Asa8G05137 | ARM repeat superfamily protein                    | 0.12  | 0.14  | 0.18  | 0.15  | 0.29   | 0.78   | 0.56    | 0.54   | 3.7   | 0.022933507 |
| Asa8G01682 | RPOL4c domain-containing protein                  | 26.21 | 25.89 | 20.83 | 24.31 | 49.95  | 41.77  | 56.29   | 49.34  | 2.03  | 0.022939787 |
| Asa4G03813 | Unknown protein                                   | 5.18  | 4.02  | 5.28  | 4.83  | 9.99   | 26.29  | 15.35   | 17.21  | 3.57  | 0.023018395 |
| Asa8G05004 | Peptidyl-prolyl cis-trans isomerase CYP65         | 7.55  | 6.24  | 9.61  | 7.8   | 12.58  | 19.11  | 19.8    | 17.16  | 2.2   | 0.02308105  |
| Asa8G02617 | Opaque endosperm1                                 | 1.47  | 0.98  | 1.53  | 1.33  | 2.2    | 4.38   | 3.72    | 3.43   | 2.59  | 0.02323451  |
| Asa7G04099 | O-methyltransferase                               | 38.76 | 7.4   | 21.74 | 22.63 | 243.62 | 780.71 | 1612.04 | 878.79 | 38.83 | 0.02324384  |
| Asa4G04714 | Glycosyltransferase                               | 0.22  | 0.16  | 0.21  | 0.2   | 0.75   | 3.04   | 3.79    | 2.53   | 12.85 | 0.023264005 |
| Asa1G00401 | Mechanosensitive ion channel protein              | 8.88  | 10.3  | 18.02 | 12.4  | 21.72  | 32.24  | 30.57   | 28.18  | 2.27  | 0.023267505 |
| Asa8G05097 | Sodium/hydrogen exchanger                         | 0.17  | 0.1   | 0.4   | 0.22  | 1.19   | 1.35   | 1.57    | 1.37   | 6.13  | 0.023273454 |
| Asa2G00848 | copine family protein 2-like isoform X2           | 1.02  | 1.1   | 1.3   | 1.14  | 2.05   | 4.73   | 3.08    | 3.29   | 2.88  | 0.023321613 |
| Asa1G02917 | Protein PLANT CADMIUM RESISTANCE 2                | 1.71  | 2.37  | 2.8   | 2.29  | 4.24   | 7.03   | 5.23    | 5.5    | 2.4   | 0.023344521 |
| Asa2G04043 | Unknown protein                                   | 24.63 | 19.64 | 21.34 | 21.87 | 40.8   | 47.82  | 62.62   | 50.41  | 2.31  | 0.023354421 |
| Asa7G07583 | Tetraspanin-2                                     | 1.88  | 1.91  | 2.84  | 2.21  | 5.24   | 5.43   | 5.3     | 5.32   | 2.41  | 0.023379775 |
| Asa2G06805 | probable transcription factor KAN2                | 1.5   | 0.99  | 1.73  | 1.41  | 2.8    | 3.65   | 3.16    | 3.2    | 2.28  | 0.02338629  |
| Asa7G02663 | Phosphatidylinositol 4-phosphate 5-kinase 1       | 6.5   | 4.13  | 5.39  | 5.34  | 9.27   | 10.39  | 12.75   | 10.8   | 2.02  | 0.023603587 |
| Asa5G00486 | Heat stress transcription factor                  | 0.78  | 0.16  | 0.13  | 0.36  | 0.9    | 1.78   | 2.09    | 1.59   | 4.46  | 0.023618252 |
| Asa0G01705 | protein TPX2-like                                 | 0.1   | 0.13  | 0.05  | 0.09  | 0.3    | 0.61   | 0.81    | 0.57   | 6.14  | 0.023618252 |
| Asa4G02588 | Endoglucanase                                     | 0.37  | 0.4   | 0.57  | 0.45  | 1.09   | 1.37   | 1.34    | 1.27   | 2.84  | 0.023778825 |
| Asa1G00953 | HTH-type transcriptional regulator                | 12.45 | 10.74 | 14.34 | 12.51 | 33.25  | 87.53  | 41.86   | 54.21  | 4.33  | 0.023827375 |
| Asa2G03605 | WD repeat and HMG-box DNA-binding protein 1       | 3.83  | 3.38  | 4.4   | 3.87  | 7.88   | 10.49  | 8.77    | 9.05   | 2.34  | 0.023827375 |
| Asa0G03481 | 2-alkenal reductase (NADP(+)-dependent)-like      | 0.51  | 0.32  | 0.37  | 0.4   | 1.73   | 4.81   | 7.11    | 4.55   | 11.38 | 0.023827375 |
| Asa6G01791 | Protein kinase domain                             | 9.76  | 9.39  | 9.61  | 9.59  | 15.61  | 23.39  | 25.98   | 21.66  | 2.26  | 0.023831033 |
| Asa5G04597 | HTH myb-type domain-containing protein            | 2.62  | 1.97  | 2.58  | 2.39  | 5.31   | 14.37  | 7.9     | 9.19   | 3.85  | 0.023989279 |
| Asa2G02074 | Proliferating cell nuclear antigen                | 3.67  | 4.79  | 6.11  | 4.86  | 9.95   | 22.46  | 12.97   | 15.13  | 3.11  | 0.024007343 |
| Asa2G01636 | TPR_REGION domain-containing protein              | 0.06  | 0.02  | 0.1   | 0.06  | 0.12   | 4.49   | 3.01    | 2.54   | 42.33 | 0.024126631 |
| Asa5G02798 | WEB family protein                                | 1     | 1.03  | 0.96  | 1     | 1.97   | 5.33   | 3.47    | 3.59   | 3.6   | 0.024211674 |
| Asa4G03456 | MADS-box transcription factor                     | 0.33  | 0.69  | 0.41  | 0.48  | 1.03   | 2.11   | 1.27    | 1.47   | 3.08  | 0.024226414 |
| Asa4G05034 | Urb2 domain-containing protein                    | 6.49  | 6.07  | 6.83  | 6.46  | 15.93  | 15.87  | 8.68    | 13.49  | 2.09  | 0.024368759 |
| Asa7G00027 | Translin                                          | 10.51 | 10.64 | 10.33 | 10.49 | 21.81  | 21.51  | 19.66   | 20.99  | 2     | 0.0244516   |
| Asa5G00698 | Glycosyltransferase                               | 1.25  | 1.02  | 0.93  | 1.07  | 1.76   | 2.97   | 3.15    | 2.63   | 2.46  | 0.024591848 |
| Asa5G05381 | Cyclin-dependent kinases regulatory subunit       | 3.86  | 3.15  | 4.49  | 3.83  | 8.43   | 29.64  | 20.95   | 19.67  | 5.13  | 0.02467778  |
| Asa3G03551 | protein kinase family protein                     | 0.86  | 0.52  | 0.56  | 0.65  | 1.56   | 5.81   | 5.61    | 4.33   | 6.69  | 0.02470833  |
| Asa4G04824 | Unknown protein                                   | 4.13  | 2.51  | 3     | 3.21  | 8.91   | 9.91   | 8.36    | 9.06   | 2.82  | 0.024713431 |
| Asa2G07433 | Cellulose synthase                                | 0     | 0.02  | 0.01  | 0.01  | 0.16   | 0.14   | 0.12    | 0.14   | 14    | 0.024779518 |
| Asa8G00037 | BURP domain-containing protein                    | 0.15  | 0.82  | 0.79  | 0.59  | 1.46   | 2.28   | 2       | 1.91   | 3.26  | 0.02502922  |
| Asa5G01449 | Serine carboxypeptidase family protein, expressed | 1.89  | 1.05  | 1.45  | 1.46  | 2.73   | 4.04   | 4.95    | 3.91   | 2.67  | 0.025031522 |
| Asa3G03095 | PPM-type phosphatase domain-containing protein    | 2.1   | 2.01  | 1.7   | 1.94  | 3.62   | 6.65   | 5.46    | 5.24   | 2.71  | 0.025037743 |
| Asa2G05220 | Putative B3 domain-containing protein             | 3.32  | 2.24  | 3.7   | 3.09  | 6.58   | 16.02  | 8.54    | 10.38  | 3.36  | 0.025120472 |
| Asa2G03221 | Putative ion channel POLLUX                       | 5.46  | 5.27  | 5.86  | 5.53  | 10.01  | 11.24  | 12.49   | 11.25  | 2.03  | 0.02515463  |
| Asa1G01502 | Kinase like protein                               | 0.92  | 1.06  | 1.21  | 1.06  | 2.5    | 5.04   | 2.37    | 3.3    | 3.11  | 0.025216414 |
| Asa3G04060 | PMD domain-containing protein                     | 4.99  | 6.49  | 7.3   | 6.26  | 13.06  | 14.32  | 11.12   | 12.83  | 2.05  | 0.025266543 |
| Asa3G01391 | cation/H(+) antiporter 15                         | 0.13  | 0.15  | 0.18  | 0.15  | 0.37   | 0.68   | 0.46    | 0.5    | 3.28  | 0.025297566 |
| Asa4G00752 | Unknown protein                                   | 0     | 0     | 0.27  | 0.09  | 0.89   | 1.96   | 1.72    | 1.52   | 16.93 | 0.025297566 |
| Asa1G00935 | HTH-type transcriptional regulator protein ptxE   | 4.38  | 5.44  | 7.37  | 5.73  | 10.77  | 27.33  | 19.59   | 19.23  | 3.36  | 0.025314042 |

|            |                                                                                 |       |       |       |       |       |        |       |       |        |             |
|------------|---------------------------------------------------------------------------------|-------|-------|-------|-------|-------|--------|-------|-------|--------|-------------|
| Asa6G04012 | ALOG domain-containing protein                                                  | 3.14  | 1.81  | 2.45  | 2.47  | 4.74  | 7.21   | 8.95  | 6.97  | 2.82   | 0.025432967 |
| Asa6G03278 | Abhydrolase_2 domain-containing protein                                         | 2.18  | 2.84  | 1.95  | 2.32  | 4.04  | 8.67   | 7.5   | 6.74  | 2.9    | 0.025432967 |
| Asa4G02923 | Midasin                                                                         | 2.52  | 2.67  | 4.18  | 3.12  | 6.26  | 9.36   | 11.46 | 9.03  | 2.89   | 0.025432967 |
| Asa6G06761 | probable vacuolar amino acid transporter YPQ1                                   | 16.35 | 10.51 | 9.24  | 12.03 | 32    | 32.82  | 52.8  | 39.21 | 3.26   | 0.025445761 |
| Asa2G03695 | Unknown protein                                                                 | 3.43  | 1.74  | 3.16  | 2.78  | 6.31  | 8.56   | 5.61  | 6.83  | 2.46   | 0.025468721 |
| Asa2G02586 | Pentatricopeptide repeat-containing protein                                     | 0.04  | 0.03  | 0.07  | 0.05  | 0.44  | 0.43   | 0.58  | 0.48  | 10.36  | 0.02553591  |
| Asa8G05927 | SNARE-interacting protein KEULE                                                 | 0.39  | 0.37  | 0.36  | 0.37  | 0.72  | 1.6    | 0.9   | 1.07  | 2.88   | 0.025664577 |
| Asa2G03313 | T-complex protein 1 subunit beta                                                | 25.71 | 23.63 | 26.59 | 25.31 | 42.54 | 50.23  | 61.81 | 51.53 | 2.04   | 0.025703876 |
| Asa4G05851 | Ribosome maturation factor                                                      | 5.71  | 4.6   | 4.64  | 4.98  | 9.55  | 10.92  | 9.52  | 10    | 2.01   | 0.025708665 |
| Asa7G03003 | Valine-tRNA ligase                                                              | 0.41  | 0.44  | 0.63  | 0.49  | 2.62  | 1.38   | 1.62  | 1.87  | 3.8    | 0.025803597 |
| Asa1G00124 | Cellulose synthase                                                              | 0     | 0     | 0.02  | 0.01  | 0     | 1.11   | 1.17  | 0.76  | 114    | 0.02581484  |
| Asa0G03503 | Reductase                                                                       | 0     | 0.09  | 0.23  | 0.11  | 0.63  | 24.3   | 10.09 | 11.67 | 109.44 | 0.025877538 |
| Asa2G07437 | Unknown protein                                                                 | 14.24 | 14.46 | 12.41 | 13.7  | 27.4  | 31.71  | 25.44 | 28.18 | 2.06   | 0.026000476 |
| Asa4G00241 | Kinesin                                                                         | 0.17  | 0.1   | 0.07  | 0.11  | 0.23  | 0.66   | 0.65  | 0.51  | 4.53   | 0.026011508 |
| Asa3G03646 | AT5G11810-like protein                                                          | 6.47  | 4.54  | 4.79  | 5.27  | 15    | 11.32  | 8.55  | 11.62 | 2.21   | 0.026175785 |
| Asa4G00556 | EF-hand domain-containing protein                                               | 0     | 0     | 0     | 0     | 0.42  | 1.18   | 2.45  | 1.35  | 135    | 0.02621066  |
| Asa4G00963 | HXXXD-type acyl-transferase family protein                                      | 1.75  | 1.14  | 1.56  | 1.48  | 3.37  | 3.71   | 3.8   | 3.63  | 2.44   | 0.026249672 |
| Asa3G02917 | Lysine-specific demethylase                                                     | 2.16  | 2.75  | 2.35  | 2.42  | 4.51  | 6.87   | 8.04  | 6.47  | 2.67   | 0.026301985 |
| Asa6G02200 | Putative Receptor-kinase                                                        | 8.3   | 9.05  | 10.7  | 9.35  | 14.21 | 22.66  | 22.47 | 19.78 | 2.12   | 0.026837194 |
| Asa4G00451 | Nascent polypeptide-associated complex subunit alpha, muscle-specific form-like | 1.32  | 0.97  | 1.42  | 1.24  | 2.38  | 7.32   | 6.04  | 5.25  | 4.24   | 0.026953817 |
| Asa1G04323 | nuclear pore complex protein NUP155                                             | 6.91  | 7.41  | 7.83  | 7.38  | 11.65 | 15.62  | 17.58 | 14.95 | 2.02   | 0.026953817 |
| Asa3G01691 | Auxin efflux carrier                                                            | 0.07  | 0.04  | 0.03  | 0.05  | 0.36  | 0.3    | 0.51  | 0.39  | 8.36   | 0.026978036 |
| Asa6G01858 | BURP domain-containing protein                                                  | 0.74  | 0.75  | 0.94  | 0.81  | 1.53  | 3.69   | 2.22  | 2.48  | 3.06   | 0.026978036 |
| Asa7G04348 | Caffeoyl-CoA O-methyltransferase                                                | 0.07  | 0.31  | 0.1   | 0.16  | 1.07  | 1.41   | 0.56  | 1.01  | 6.33   | 0.027133236 |
| Asa5G00797 | beta-fructofuranosidase 1                                                       | 11.75 | 12.73 | 14.87 | 13.12 | 33.89 | 129.73 | 77.9  | 80.51 | 6.14   | 0.027159461 |
| Asa6G05571 | Unknown protein                                                                 | 0.13  | 0.12  | 0.19  | 0.15  | 0.31  | 6.99   | 7.62  | 4.97  | 33.91  | 0.0271928   |
| Asa4G03144 | Cyclin                                                                          | 0.15  | 0.08  | 0.03  | 0.09  | 0.23  | 0.77   | 0.49  | 0.5   | 5.73   | 0.027203259 |
| Asa8G06215 | Formin-like protein                                                             | 0.16  | 0.22  | 0.15  | 0.18  | 0.5   | 6.63   | 6.77  | 4.63  | 26.23  | 0.027455109 |
| Asa6G01202 | DEAD domain-containing protein                                                  | 11.43 | 9.97  | 12.48 | 11.29 | 19.22 | 22.14  | 27.58 | 22.98 | 2.03   | 0.027461806 |
| Asa6G02665 | DUF659 domain-containing protein                                                | 4.07  | 3.3   | 4.35  | 3.91  | 9.16  | 18.79  | 8.52  | 12.16 | 3.11   | 0.027559987 |
| Asa5G02372 | Beta-glucosidase                                                                | 0     | 0.03  | 0.04  | 0.02  | 0     | 3.2    | 4.52  | 2.57  | 110.29 | 0.027612108 |
| Asa8G01132 | Transcription termination factor like                                           | 3.63  | 2.95  | 3.4   | 3.33  | 9.86  | 8.61   | 6.63  | 8.37  | 2.52   | 0.027615707 |
| Asa3G02701 | High mobility group b protein 6                                                 | 0.17  | 0.13  | 0.07  | 0.12  | 0.18  | 6.65   | 6.61  | 4.48  | 36.32  | 0.027628011 |
| Asa8G00409 | protein kinase family protein                                                   | 0.18  | 0.42  | 0.28  | 0.29  | 1.01  | 1.82   | 1.95  | 1.59  | 5.43   | 0.027713647 |
| Asa1G01403 | putative axial regulator YABBY 2                                                | 2.27  | 1.64  | 1.98  | 1.96  | 3.6   | 5.85   | 3.48  | 4.31  | 2.2    | 0.02778512  |
| Asa1G02945 | FAD_binding_3 domain-containing protein                                         | 0.06  | 0.1   | 0.11  | 0.09  | 0.35  | 0.5    | 0.61  | 0.49  | 5.41   | 0.027915907 |
| Asa8G05669 | PREDICTED: cellulose synthase                                                   | 0.74  | 0.91  | 1.07  | 0.91  | 1.86  | 2.2    | 1.6   | 1.89  | 2.08   | 0.027926112 |
| Asa8G04361 | Remorin_C domain-containing protein                                             | 0.56  | 0.51  | 0.37  | 0.48  | 1.79  | 9.37   | 11.44 | 7.53  | 15.69  | 0.027926112 |
| Asa4G05591 | Fanconi anemia group F protein (FANCF)                                          | 3.39  | 2.79  | 2.01  | 2.73  | 4.7   | 6.09   | 7.06  | 5.95  | 2.18   | 0.028180342 |
| Asa5G03937 | Unknown protein                                                                 | 2.86  | 1.43  | 0.57  | 1.62  | 4.01  | 4.66   | 5.37  | 4.68  | 2.89   | 0.02823182  |
| Asa5G05173 | protein CHUP1, chloroplastic-like                                               | 0     | 0.09  | 0.14  | 0.08  | 0.28  | 2.2    | 2.14  | 1.54  | 20.09  | 0.028417885 |
| Asa4G03837 | Heat shock 70 kDa protein                                                       | 0.49  | 1.64  | 2.26  | 1.46  | 3.78  | 4.36   | 5.42  | 4.52  | 3.09   | 0.028419024 |
| Asa3G03758 | Coat protein                                                                    | 7.11  | 5.99  | 6.1   | 6.4   | 11.33 | 14.01  | 15.29 | 13.54 | 2.12   | 0.028437363 |
| Asa6G06497 | U-box domain-containing protein                                                 | 0.06  | 0.03  | 0     | 0.03  | 0.07  | 1.64   | 1.39  | 1.03  | 34.44  | 0.028444344 |
| Asa7G07647 | Serine/threonine protein phosphatase 2A regulatory subunit                      | 1.06  | 0.8   | 0.84  | 0.9   | 1.78  | 2.73   | 1.34  | 1.95  | 2.17   | 0.028510902 |
| Asa8G05254 | Histone H2A                                                                     | 4.12  | 5.3   | 5.91  | 5.11  | 8.37  | 13.33  | 10.31 | 10.67 | 2.09   | 0.028541399 |

|            |                                                                          |        |        |       |        |       |        |        |        |        |             |
|------------|--------------------------------------------------------------------------|--------|--------|-------|--------|-------|--------|--------|--------|--------|-------------|
| Asa7G01896 | RNA-binding protein                                                      | 229.42 | 223.12 | 254.5 | 235.68 | 694   | 754.21 | 335.23 | 594.48 | 2.52   | 0.028553395 |
|            | protein POLAR LOCALIZATION DURING                                        |        |        |       |        |       |        |        |        |        |             |
| Asa6G04937 | ASYMMETRIC DIVISION AND REDISTRIBUTION-like                              | 0      | 0      | 0     | 0      | 0     | 0.83   | 0.65   | 0.49   | 49.33  | 0.028656869 |
| Asa2G00295 | Histone H3                                                               | 11.33  | 9.99   | 11.61 | 10.98  | 19.16 | 51.75  | 39.7   | 36.87  | 3.36   | 0.028709861 |
| Asa8G03917 | Protein GIGAS CELL1-like                                                 | 0.07   | 0.19   | 0.35  | 0.2    | 0.98  | 1.37   | 0.95   | 1.1    | 5.41   | 0.028812352 |
| Asa2G04873 | Cyclin                                                                   | 0.71   | 0.84   | 1.11  | 0.89   | 1.85  | 2.87   | 1.7    | 2.14   | 2.41   | 0.02882255  |
| Asa6G01477 | Unknown protein                                                          | 7.54   | 7.52   | 6.06  | 7.04   | 15.01 | 15.74  | 14.81  | 15.19  | 2.16   | 0.028854936 |
| Asa4G04219 | DUF674 family protein                                                    | 1.57   | 1.32   | 1.36  | 1.42   | 2.3   | 4.16   | 2.44   | 2.97   | 2.09   | 0.028857273 |
| Asa2G07143 | zinc_ribbon_12 domain-containing protein                                 | 2.32   | 1.85   | 2.22  | 2.13   | 3.56  | 9.1    | 7.06   | 6.57   | 3.09   | 0.028858906 |
| Asa7G07556 | Cytochrome P450 family protein, expressed                                | 0.23   | 0.08   | 0.13  | 0.15   | 0.6   | 0.69   | 0.45   | 0.58   | 3.95   | 0.028878862 |
| Asa6G02701 | Pentatricopeptide repeat-containing protein, mitochondrial               | 1.43   | 1.58   | 2.34  | 1.78   | 4.18  | 3.83   | 5.66   | 4.56   | 2.56   | 0.028894248 |
| Asa8G04796 | AP2-like ethylene-responsive transcription factor                        | 0.12   | 0.03   | 0     | 0.05   | 0.14  | 1.25   | 0.93   | 0.77   | 15.47  | 0.028924502 |
| Asa0G01689 | Histone acetyltransferase KAT6B-like                                     | 0.07   | 0      | 0.08  | 0.05   | 0.05  | 2.69   | 2.92   | 1.89   | 37.73  | 0.028930597 |
| Asa6G03134 | Receptor-like protein kinase                                             | 0.2    | 0.21   | 0.23  | 0.21   | 0.72  | 7.36   | 4.52   | 4.2    | 19.69  | 0.028991539 |
| Asa3G02828 | PREDICTED: U-box domain-containing                                       | 3.07   | 1.88   | 3.02  | 2.66   | 5.72  | 6.42   | 6.92   | 6.35   | 2.39   | 0.028991539 |
| Asa0G03345 | Non-symbiotic hemoglobin                                                 | 8.76   | 11.01  | 9     | 9.59   | 22.57 | 24.52  | 36.4   | 27.83  | 2.9    | 0.028992255 |
| Asa8G00639 | CAP-gly domain linker                                                    | 1.05   | 0.73   | 0.95  | 0.91   | 1.78  | 2.26   | 1.8    | 1.95   | 2.14   | 0.02903039  |
| Asa6G03193 | Chitin elicitor receptor kinase                                          | 6.59   | 6.79   | 6.13  | 6.5    | 15.16 | 14.16  | 21.74  | 17.02  | 2.62   | 0.029259791 |
| Asa3G01193 | UDP-glycosyltransferase                                                  | 0.83   | 0.77   | 1.34  | 0.98   | 1.86  | 4.69   | 2.97   | 3.17   | 3.24   | 0.029295255 |
| Asa3G00548 | B3 domain-containing protein                                             | 4.83   | 5.22   | 5.83  | 5.29   | 9.1   | 11.69  | 11.01  | 10.6   | 2      | 0.029353931 |
| Asa2G02628 | PREDICTED: DNA-directed RNA polymerase                                   | 48.88  | 46.28  | 43.74 | 46.3   | 89.71 | 109.74 | 147.1  | 115.52 | 2.49   | 0.029415997 |
| Asa3G04675 | Peroxidase                                                               | 2.31   | 1.41   | 2.4   | 2.04   | 5.74  | 6.04   | 5.23   | 5.67   | 2.78   | 0.029445081 |
| Asa6G04826 | RING-type domain-containing protein                                      | 2.96   | 1.45   | 2.35  | 2.25   | 3.49  | 5.88   | 5.61   | 4.99   | 2.22   | 0.0294975   |
| Asa4G05371 | DnaJ domain-containing protein                                           | 2.74   | 1.98   | 2.31  | 2.34   | 5.76  | 5.8    | 9.24   | 6.93   | 2.96   | 0.029507067 |
| Asa5G01266 | TPR_REGION domain-containing protein                                     | 1.21   | 1.09   | 1.67  | 1.32   | 2     | 3.72   | 2.82   | 2.85   | 2.15   | 0.029507067 |
| Asa2G00017 | Disease resistance protein                                               | 0.78   | 0.72   | 0.66  | 0.72   | 1.19  | 1.57   | 1.71   | 1.49   | 2.07   | 0.029540394 |
| Asa4G04846 | Histone H4                                                               | 4.89   | 4.48   | 7.02  | 5.46   | 10.59 | 26.27  | 26.68  | 21.18  | 3.88   | 0.030149095 |
| Asa0G03363 | Eukaryotic translation initiation factor 2 subunit alpha                 | 16.96  | 16.57  | 17.12 | 16.88  | 26.81 | 40.16  | 44.65  | 37.21  | 2.2    | 0.030235769 |
| Asa4G00337 | deoxyuridine 5'-triphosphate nucleotidohydrolase-like                    | 0.51   | 0.75   | 0.71  | 0.66   | 1.78  | 9.67   | 8.88   | 6.78   | 10.32  | 0.030262466 |
| Asa7G06597 | Histone-lysine N-methyltransferase, H3 lysine-9 specific protein         | 0.88   | 0.72   | 0.53  | 0.71   | 1.28  | 1.57   | 1.75   | 1.53   | 2.16   | 0.030367511 |
| Asa8G01105 | Formin-like protein 18                                                   | 3.03   | 3.56   | 3.33  | 3.31   | 8.14  | 7.27   | 6.82   | 7.41   | 2.24   | 0.030623067 |
| Asa1G02964 | Unknown protein                                                          | 2.82   | 3.37   | 5.52  | 3.9    | 9.43  | 8.54   | 12.4   | 10.12  | 2.59   | 0.030726203 |
| Asa8G00166 | Factor of DNA methylation like                                           | 0.04   | 0.05   | 0.03  | 0.04   | 0.13  | 0.32   | 0.37   | 0.27   | 6.83   | 0.030735131 |
| Asa7G06448 | DUF3527 domain protein                                                   | 1.69   | 1.34   | 1.59  | 1.54   | 2.35  | 4.34   | 2.73   | 3.14   | 2.04   | 0.0307538   |
| Asa5G05788 | Putative amino acid transporter, transmembrane domain-containing protein | 0.71   | 0.65   | 1.25  | 0.87   | 2.2   | 8.09   | 4.62   | 4.97   | 5.71   | 0.030895507 |
| Asa0G00420 | Fe2OG dioxygenase domain-containing protein                              | 8.51   | 7.65   | 3.26  | 6.47   | 11.94 | 28.83  | 25.08  | 21.95  | 3.39   | 0.030941169 |
| Asa5G02417 | probable membrane-associated kinase regulator 4                          | 0      | 0      | 0     | 0      | 0     | 2.06   | 3.9    | 1.99   | 198.67 | 0.031083755 |
| Asa8G02674 | VWFA domain-containing protein                                           | 4.76   | 3.79   | 7.47  | 5.34   | 9.17  | 19.11  | 12.72  | 13.67  | 2.56   | 0.03108838  |
| Asa6G02636 | Subtilisin-like protease                                                 | 2.81   | 2.61   | 2.6   | 2.67   | 5.72  | 5.28   | 5.21   | 5.4    | 2.02   | 0.03108838  |
| Asa4G06039 | Clp_N domain-containing protein                                          | 0.12   | 0.11   | 0.03  | 0.09   | 0.24  | 0.7    | 0.66   | 0.53   | 6.15   | 0.031146477 |
| Asa7G03328 | Protein DCL, chloroplastic                                               | 28.22  | 25.76  | 28.38 | 27.45  | 47.42 | 57.29  | 72.47  | 59.06  | 2.15   | 0.03124805  |

|            |                                                                       |       |       |       |       |        |        |        |        |         |             |
|------------|-----------------------------------------------------------------------|-------|-------|-------|-------|--------|--------|--------|--------|---------|-------------|
| Asa4G02413 | Putative DNA helicase chromatin remodeling SNF2 family                | 0.04  | 0.17  | 0.08  | 0.1   | 0.32   | 0.43   | 0.57   | 0.44   | 4.55    | 0.03124805  |
| Asa0G00791 | Peroxisomal membrane protein PMP22                                    | 1.19  | 0.85  | 1.24  | 1.09  | 2.96   | 3.4    | 2.53   | 2.96   | 2.71    | 0.031304729 |
| Asa8G04784 | NHL domain-containing protein                                         | 7.16  | 7.01  | 10.39 | 8.19  | 16.84  | 30.1   | 14.91  | 20.62  | 2.52    | 0.03135253  |
| Asa6G00647 | FAS1 domain-containing protein                                        | 0.72  | 0.51  | 0.6   | 0.61  | 2      | 1.79   | 2      | 1.93   | 3.16    | 0.031359972 |
| Asa4G00293 | Pathogenesis-related protein 1                                        | 0     | 0     | 0     | 0     | 0      | 2.68   | 4.4    | 2.36   | 236     | 0.031359972 |
| Asa4G00821 | Unknown protein                                                       | 3.31  | 3.99  | 4.33  | 3.88  | 10.52  | 8.87   | 7.84   | 9.08   | 2.34    | 0.031485553 |
| Asa0G01293 | Xanthine dehydrogenase                                                | 62.91 | 49.4  | 49.11 | 53.81 | 109.55 | 120.41 | 171.03 | 133.66 | 2.48    | 0.031745702 |
| Asa2G05337 | Cytochrome P450                                                       | 5.97  | 6.29  | 7.23  | 6.5   | 10.71  | 19.51  | 11.52  | 13.91  | 2.14    | 0.031747994 |
| Asa7G03477 | Ubiquitin-conjugating enzyme, E2                                      | 5.02  | 7.46  | 6.62  | 6.37  | 12.84  | 14.94  | 13.38  | 13.72  | 2.15    | 0.031747994 |
| Asa6G02060 | Unknown protein                                                       | 0.1   | 0.18  | 0.4   | 0.23  | 1.03   | 4.54   | 6.1    | 3.89   | 17.16   | 0.03183183  |
| Asa3G03615 | LOB domain-containing protein                                         | 0     | 0     | 0     | 0     | 0.53   | 0.25   | 0.36   | 0.38   | 38      | 0.031884862 |
| Asa7G02799 | PREDICTED: non-symbiotic hemoglobin                                   | 13.8  | 13.26 | 9.57  | 12.21 | 24.48  | 33.3   | 43.76  | 33.85  | 2.77    | 0.031894624 |
| Asa6G03098 | Unknown protein                                                       | 1.43  | 1.36  | 1.49  | 1.43  | 2.46   | 3.82   | 3.05   | 3.11   | 2.18    | 0.031894624 |
| Asa7G05641 | Polygalacturonase inhibitor                                           | 0.27  | 1.2   | 0.9   | 0.79  | 3.6    | 3.5    | 6.64   | 4.58   | 5.8     | 0.03196067  |
| Asa7G01406 | Receptor-like protein kinase                                          | 0.3   | 0.25  | 0.22  | 0.26  | 0.89   | 3.95   | 1.91   | 2.25   | 8.77    | 0.031997647 |
| Asa2G05212 | Putative high mobility group box domain-containing protein            | 2.3   | 3.92  | 1.48  | 2.57  | 7.99   | 53.05  | 56.85  | 39.3   | 15.31   | 0.03199771  |
| Asa3G04040 | Polygalacturonase inhibitor                                           | 0     | 0     | 0.03  | 0.01  | 0.05   | 1.41   | 0.85   | 0.77   | 77      | 0.032036148 |
| Asa0G01649 | beta-fructofuranosidase 1                                             | 20.47 | 18.01 | 20.95 | 19.81 | 43.44  | 152.84 | 93.88  | 96.72  | 4.88    | 0.032043434 |
| Asa4G04314 | Protein EFR3                                                          | 2.02  | 1.92  | 2.04  | 1.99  | 3.55   | 10.16  | 8.29   | 7.33   | 3.68    | 0.032055773 |
| Asa2G00751 | Histone H3                                                            | 3.24  | 2.31  | 3.65  | 3.07  | 6.62   | 20.55  | 11.67  | 12.95  | 4.22    | 0.032172692 |
| Asa8G05691 | Unknown protein                                                       | 2.9   | 2.56  | 2.36  | 2.61  | 5.51   | 6.32   | 7.08   | 6.3    | 2.42    | 0.032320922 |
| Asa2G03540 | TPR_REGION domain-containing protein                                  | 0.71  | 1.54  | 1.55  | 1.27  | 2.35   | 4.84   | 3.37   | 3.52   | 2.78    | 0.032471678 |
| Asa7G00657 | DUF4283 domain-containing protein/zf-CCHC_4 domain-containing protein | 1.44  | 1.06  | 1.41  | 1.3   | 2.64   | 3.91   | 2.76   | 3.1    | 2.38    | 0.032622594 |
| Asa2G04817 | Putative transcription factor bHLH family                             | 1.18  | 0.22  | 0.7   | 0.7   | 1.4    | 5.73   | 5.1    | 4.08   | 5.82    | 0.032876987 |
| Asa3G02377 | 40S ribosomal protein SA                                              | 4.46  | 2.43  | 3.2   | 3.36  | 6.94   | 6.66   | 9.37   | 7.66   | 2.28    | 0.032884356 |
| Asa4G01715 | WD and tetratricopeptide repeats protein 1-like                       | 6.52  | 6.45  | 7.32  | 6.76  | 13.39  | 16.29  | 22.3   | 17.33  | 2.56    | 0.032913544 |
| Asa5G05718 | Histone H2B                                                           | 43.2  | 41.48 | 46.29 | 43.66 | 62.41  | 119.6  | 90.24  | 90.75  | 2.08    | 0.032913544 |
| Asa7G02295 | Pentatricopeptide repeat-containing protein, mitochondrial            | 7.5   | 6.48  | 6.74  | 6.91  | 14.49  | 18.19  | 25.73  | 19.47  | 2.82    | 0.033058204 |
| Asa0G01010 | Polygalacturonase                                                     | 0     | 0     | 0     | 0     | 0.04   | 7.74   | 34.19  | 13.99  | 1399    | 0.033198409 |
| Asa7G07273 | cell division cycle protein 48 homolog                                | 49.84 | 45.63 | 46.95 | 47.47 | 87.69  | 97.51  | 131.09 | 105.43 | 2.22    | 0.033293759 |
| Asa4G04050 | Coatomer subunit beta                                                 | 0.87  | 0.94  | 0.95  | 0.92  | 1.78   | 3.46   | 1.76   | 2.33   | 2.54    | 0.033421184 |
| Asa1G01851 | Histone H1-like protein                                               | 5.02  | 4.13  | 3.98  | 4.38  | 6.17   | 11.49  | 9.43   | 9.03   | 2.06    | 0.033568447 |
| Asa0G00239 | Cytochrome P450                                                       | 0.06  | 0     | 0.02  | 0.03  | 0.1    | 0.44   | 0.57   | 0.37   | 13.87   | 0.033591538 |
| Asa2G03608 | Receptor protein kinase-like protein                                  | 1.66  | 1.67  | 1.98  | 1.77  | 3.39   | 9.36   | 9.15   | 7.3    | 4.12    | 0.033647165 |
| Asa2G00984 | Putative transcriptional activator DEMETER-like                       | 0.45  | 0.51  | 0.53  | 0.5   | 1.2    | 1.75   | 0.98   | 1.31   | 2.64    | 0.03365935  |
| Asa5G00040 | DUF862 domain-containing protein                                      | 4.86  | 3.93  | 5     | 4.6   | 6.78   | 11.19  | 11.33  | 9.77   | 2.12    | 0.033746708 |
| Asa4G01957 | Polygalacturonase                                                     | 0     | 0     | 0     | 0     | 0.04   | 7.41   | 32.89  | 13.45  | 1344.67 | 0.033971053 |
| Asa6G06065 | Protein TOO MANY MOUTHS                                               | 0.18  | 0     | 0.05  | 0.08  | 0.26   | 1.64   | 0.82   | 0.91   | 11.83   | 0.034033194 |
| Asa3G04601 | UDP-glycosyltransferase                                               | 0     | 0.02  | 0     | 0.01  | 0      | 2.42   | 1.09   | 1.17   | 175.5   | 0.034033194 |
| Asa4G00223 | Pentatricopeptide repeat-containing protein                           | 1.39  | 1.68  | 1.64  | 1.57  | 3.07   | 3.45   | 3.78   | 3.43   | 2.19    | 0.034033194 |
| Asa5G02610 | Tubulin alpha chain                                                   | 1.37  | 1.83  | 2.08  | 1.76  | 3.55   | 4.03   | 3.67   | 3.75   | 2.13    | 0.034100011 |
| Asa2G03140 | 60S ribosomal protein L9                                              | 14.68 | 17.73 | 14.47 | 15.63 | 24.31  | 37.76  | 34.15  | 32.07  | 2.05    | 0.034188267 |
| Asa7G04473 | Cyclic pyranopterin monophosphate synthase                            | 1.29  | 0.46  | 0.12  | 0.62  | 2.2    | 3.34   | 2.52   | 2.69   | 4.31    | 0.034217255 |

|            |                                                          |         |        |         |         |         |         |         |         |        |             |
|------------|----------------------------------------------------------|---------|--------|---------|---------|---------|---------|---------|---------|--------|-------------|
| Asa6G04887 | class I heat shock protein-like                          | 1.75    | 2.14   | 3.02    | 2.3     | 8.69    | 6.81    | 7.36    | 7.62    | 3.31   | 0.03427517  |
| Asa2G06982 | Cytochrome P450                                          | 0.17    | 0.12   | 0.1     | 0.13    | 0.32    | 3.63    | 3.32    | 2.42    | 18.64  | 0.034391641 |
| Asa2G06086 | cold regulated protein 27                                | 3.8     | 3.1    | 2.47    | 3.12    | 7.34    | 6.45    | 9.98    | 7.92    | 2.54   | 0.034400134 |
| Asa4G00552 | EF-hand domain-containing protein                        | 0.11    | 0.06   | 0       | 0.06    | 1.07    | 1.24    | 0.26    | 0.86    | 15.12  | 0.034425707 |
| Asa6G06243 | Kinesin-like protein                                     | 0.2     | 0.12   | 0.23    | 0.18    | 0.5     | 1.91    | 2.05    | 1.49    | 8.11   | 0.034461166 |
| Asa7G05685 | Histone H2B                                              | 5.59    | 4.48   | 5.91    | 5.33    | 10.19   | 29.89   | 29.26   | 23.11   | 4.34   | 0.034480398 |
| Asa2G06729 | UPF0481 protein                                          | 0.14    | 0      | 0.07    | 0.07    | 0.18    | 1.34    | 1.05    | 0.86    | 12.24  | 0.034540397 |
| Asa6G06201 | PREDICTED: seed maturation PM41                          | 0       | 0      | 0       | 0       | 1.64    | 0.38    | 2.58    | 1.53    | 153.33 | 0.034626809 |
| Asa5G02696 | Myb family transcription factor                          | 5.56    | 4.42   | 5.84    | 5.27    | 10.11   | 18.03   | 22.04   | 16.73   | 3.17   | 0.034953714 |
| Asa5G00305 | TPR_REGION domain-containing protein                     | 0.11    | 0.11   | 0.2     | 0.14    | 0.42    | 0.87    | 0.63    | 0.64    | 4.57   | 0.034968753 |
| Asa0G03318 | Histone H3                                               | 5.63    | 6.77   | 6.81    | 6.4     | 13.17   | 32.46   | 17.44   | 21.02   | 3.28   | 0.035227622 |
| Asa7G00693 | Receptor-like serine/threonine-protein kinase            | 0.34    | 0.34   | 0.36    | 0.35    | 0.72    | 0.96    | 0.97    | 0.88    | 2.55   | 0.035379522 |
| Asa7G05898 | MFS domain-containing protein                            | 2.32    | 2.31   | 3.07    | 2.57    | 7.32    | 6.37    | 5.69    | 6.46    | 2.52   | 0.035396289 |
| Asa5G05559 | Alliinase                                                | 1167.47 | 927.72 | 1263.22 | 1119.47 | 1754.91 | 2333.65 | 2688.39 | 2258.98 | 2.02   | 0.035670748 |
| Asa3G04414 | spindle and kinetochore-associated protein 1 homolog     | 0.5     | 0.83   | 1.18    | 0.84    | 2.07    | 4.92    | 2.39    | 3.13    | 3.74   | 0.035681047 |
| Asa7G05609 | Unknown protein                                          | 0       | 0.09   | 0       | 0.03    | 0.19    | 2.69    | 2.61    | 1.83    | 61     | 0.035869699 |
| Asa3G00582 | F-box family protein                                     | 1.62    | 1.62   | 2.25    | 1.83    | 3.14    | 4.11    | 4.95    | 4.07    | 2.22   | 0.035869699 |
| Asa6G01417 | SAM-dependent MTase TRM10-type domain-containing protein | 3       | 3.24   | 3.36    | 3.2     | 5.32    | 7.78    | 6.27    | 6.46    | 2.02   | 0.035878628 |
| Asa3G01430 | PR domain zinc finger protein 8, putative isoform 1      | 2.25    | 2.82   | 2.07    | 2.38    | 5.24    | 5.94    | 4.8     | 5.33    | 2.24   | 0.035935837 |
| Asa4G04444 | Unknown protein                                          | 2.23    | 2.52   | 1.27    | 2.01    | 7.69    | 6.34    | 3.47    | 5.83    | 2.91   | 0.036141524 |
| Asa7G07253 | Glutathione S-transferase                                | 0.32    | 0.28   | 0.32    | 0.31    | 0.85    | 1.54    | 0.58    | 0.99    | 3.23   | 0.036141524 |
| Asa4G03962 | Beta-galactosidase                                       | 9.62    | 8.97   | 9.04    | 9.21    | 17.57   | 17.63   | 20.62   | 18.61   | 2.02   | 0.036332004 |
| Asa4G05908 | Putative serine/threonine-protein kinase TAO3-like       | 0       | 0      | 0       | 0       | 0       | 1.62    | 2.44    | 1.35    | 135.33 | 0.036433767 |
| Asa7G00870 | Auxin-responsive family protein                          | 0.3     | 0.12   | 0.16    | 0.19    | 1       | 1.87    | 0.61    | 1.16    | 6      | 0.036469069 |
| Asa3G04020 | Unknown protein                                          | 7.65    | 5.88   | 8.52    | 7.35    | 12.53   | 14.99   | 17.02   | 14.85   | 2.02   | 0.036484465 |
| Asa5G05055 | MFS domain-containing protein                            | 1.92    | 3.52   | 3.34    | 2.93    | 6.21    | 5.83    | 6.5     | 6.18    | 2.11   | 0.036484465 |
| Asa5G01648 | Heavy metal-associated isoprenylated plant protein       | 17.17   | 12.92  | 14.56   | 14.88   | 27.43   | 95.75   | 73.76   | 65.65   | 4.41   | 0.036661409 |
| Asa3G04606 | Kinesin-like protein                                     | 0.54    | 0.43   | 0.28    | 0.42    | 0.83    | 3.18    | 2.61    | 2.21    | 5.3    | 0.037037635 |
| Asa8G04591 | 60S ribosomal protein L9                                 | 9.34    | 11.28  | 9.43    | 10.02   | 15.65   | 24.03   | 21.55   | 20.41   | 2.04   | 0.03717683  |
| Asa2G02233 | ABC transporter ATP-binding/permease protein like        | 0       | 0      | 0       | 0       | 0       | 1.96    | 1.17    | 1.04    | 104.33 | 0.037370984 |
| Asa3G01065 | CRC domain-containing protein                            | 0.29    | 0.44   | 0.41    | 0.38    | 0.9     | 3.58    | 2.25    | 2.24    | 5.9    | 0.037423867 |
| Asa1G03494 | VARLMGL domain-containing protein                        | 0.53    | 0.55   | 0.44    | 0.51    | 1.37    | 5.69    | 3.1     | 3.39    | 6.68   | 0.037554644 |
| Asa2G03050 | Unknown protein                                          | 1.33    | 0.84   | 0.82    | 1       | 2.65    | 4.76    | 2.08    | 3.16    | 3.17   | 0.037568914 |
| Asa4G00848 | 60S ribosomal protein L17                                | 106.72  | 102.72 | 106.17  | 105.2   | 188.85  | 218.64  | 288.74  | 232.08  | 2.21   | 0.037593604 |
| Asa5G02358 | Early nodulin-93                                         | 0       | 0      | 0       | 0       | 0.78    | 0.65    | 0.75    | 0.73    | 72.67  | 0.037638707 |
| Asa1G02047 | AT-hook motif nuclear-localized protein                  | 0       | 0      | 0.04    | 0.01    | 0.19    | 2.52    | 0.96    | 1.22    | 91.75  | 0.037682921 |
| Asa5G03037 | synaptotagmin-5-like                                     | 0.14    | 0.17   | 0.21    | 0.17    | 0.43    | 0.85    | 0.44    | 0.57    | 3.31   | 0.03768576  |
| Asa6G06867 | SHSP domain-containing protein                           | 21.89   | 19.22  | 22.49   | 21.2    | 44.15   | 62.8    | 29.36   | 45.44   | 2.14   | 0.037803784 |
| Asa0G03275 | Metacaspase                                              | 1.24    | 2      | 1.29    | 1.51    | 2.54    | 5.38    | 4.16    | 4.03    | 2.67   | 0.037823302 |
| Asa7G04941 | Heat shock 70 kDa protein, putative                      | 10.48   | 8.43   | 8.18    | 9.03    | 16.08   | 16.65   | 21.97   | 18.23   | 2.02   | 0.037889002 |
| Asa7G06955 | Protein kinase domain-containing protein                 | 0       | 0      | 0       | 0       | 0       | 2.97    | 2.13    | 1.7     | 170    | 0.037901374 |
| Asa7G01855 | Histone H4                                               | 4.64    | 3.11   | 5.58    | 4.44    | 7.32    | 10.42   | 11.61   | 9.78    | 2.2    | 0.037982703 |
| Asa0G00292 | Serine/threonine-protein kinase atr                      | 0.21    | 0.12   | 0.09    | 0.14    | 0.36    | 3.16    | 3.36    | 2.29    | 16.38  | 0.037996489 |

|            |                                                             |        |        |        |        |        |        |        |        |       |             |
|------------|-------------------------------------------------------------|--------|--------|--------|--------|--------|--------|--------|--------|-------|-------------|
| Asa4G04284 | Coat protein                                                | 3.38   | 2.83   | 3.12   | 3.11   | 5.24   | 6.79   | 6.95   | 6.33   | 2.03  | 0.038045483 |
| Asa1G02919 | Unknown protein                                             | 2.12   | 1.11   | 1.78   | 1.67   | 4.02   | 4.9    | 3.89   | 4.27   | 2.56  | 0.038133553 |
| Asa4G02217 | Pentatricopeptide repeat                                    | 0.44   | 0.19   | 0.28   | 0.3    | 0.91   | 0.78   | 0.65   | 0.78   | 2.57  | 0.038175971 |
| Asa6G00959 | Unknown protein                                             | 3.03   | 4.03   | 5.65   | 4.24   | 8.92   | 12.54  | 10     | 10.49  | 2.48  | 0.038220928 |
| Asa2G00289 | Usp domain-containing protein                               | 16.95  | 17.97  | 20.86  | 18.59  | 37.25  | 51.78  | 69.6   | 52.88  | 2.84  | 0.038406114 |
| Asa3G01593 | Peroxidase                                                  | 1.01   | 1.01   | 1.2    | 1.07   | 3.58   | 20.1   | 26.23  | 16.64  | 15.5  | 0.038706366 |
| Asa4G01399 | Kinesin                                                     | 0.06   | 0.09   | 0.11   | 0.09   | 0.2    | 2.23   | 2.02   | 1.48   | 17.12 | 0.038770053 |
| Asa2G04517 | BHLH transcription factor                                   | 0.09   | 0.18   | 0.23   | 0.17   | 1.2    | 1.62   | 0.37   | 1.06   | 6.38  | 0.038858401 |
| Asa5G03438 | Putative coiled-coil domain-containing protein<br>SCD2      | 0.43   | 0.49   | 0.58   | 0.5    | 1.15   | 2.3    | 1.03   | 1.49   | 2.99  | 0.038917695 |
| Asa2G02799 | Cytochrome P450                                             | 9.13   | 7.48   | 8.56   | 8.39   | 20.96  | 19.66  | 10.97  | 17.2   | 2.05  | 0.03894498  |
| Asa2G00293 | Histone H3                                                  | 35.05  | 24.27  | 40.45  | 33.26  | 60.79  | 200.95 | 136.5  | 132.75 | 3.99  | 0.039072896 |
| Asa4G04009 | Unknown protein                                             | 1.71   | 1.87   | 2.03   | 1.87   | 4.19   | 5.49   | 2.54   | 4.07   | 2.18  | 0.039074421 |
| Asa4G03329 | Elongation factor 1-beta                                    | 134.27 | 111.71 | 106.47 | 117.48 | 263.34 | 349.71 | 513.63 | 375.56 | 3.2   | 0.039132775 |
| Asa1G00958 | Cytochrome c domain-containing protein                      | 6.14   | 6.63   | 6.82   | 6.53   | 12.66  | 21.43  | 26.78  | 20.29  | 3.11  | 0.039696598 |
| Asa6G06296 | F-box domain-containing protein                             | 2.16   | 2.53   | 1.6    | 2.1    | 4.42   | 5.16   | 3.41   | 4.33   | 2.07  | 0.03971105  |
| Asa2G07239 | Aa_trans domain-containing protein                          | 5.81   | 6.44   | 7.74   | 6.66   | 14.87  | 12.99  | 14.17  | 14.01  | 2.1   | 0.039864403 |
| Asa1G01948 | bHLH-MYC_N domain-containing protein                        | 7.77   | 6.83   | 6.03   | 6.88   | 12.53  | 13.02  | 17.23  | 14.26  | 2.07  | 0.039908864 |
| Asa3G01551 | Cyclin                                                      | 0.03   | 0.02   | 0.09   | 0.05   | 0.07   | 3.14   | 4.67   | 2.63   | 56.29 | 0.039908864 |
| Asa7G03799 | Unknown protein                                             | 16.38  | 17.26  | 15.49  | 16.38  | 26.37  | 62.27  | 41.49  | 43.38  | 2.65  | 0.040226235 |
| Asa3G03563 | Carotenoid cleavage dioxygenase 8                           | 0      | 0.02   | 0.02   | 0.01   | 0.03   | 2.29   | 1.08   | 1.13   | 85    | 0.040239168 |
| Asa3G02574 | ATP-dependent RNA helicase                                  | 90.36  | 79.27  | 85.57  | 85.07  | 158.15 | 182.33 | 249.08 | 196.52 | 2.31  | 0.040618078 |
| Asa7G00925 | Glycosyltransferase                                         | 0.55   | 0.51   | 0.36   | 0.47   | 0.89   | 2.24   | 1.27   | 1.47   | 3.1   | 0.040645202 |
| Asa8G04864 | Protein too many mouths                                     | 0.78   | 0.75   | 1.05   | 0.86   | 1.75   | 1.95   | 2.77   | 2.16   | 2.51  | 0.040683217 |
| Asa5G03957 | XRCC1_N domain-containing protein                           | 2.87   | 3.01   | 2.99   | 2.96   | 4.89   | 6.69   | 8.06   | 6.55   | 2.21  | 0.040863792 |
| Asa3G02986 | Receptor-like serine/threonine-protein kinase               | 11.18  | 13.79  | 12.63  | 12.53  | 27.77  | 21.16  | 30.03  | 26.32  | 2.1   | 0.040879754 |
| Asa7G05547 | PREDICTED: Profilin                                         | 1.08   | 1.06   | 0.83   | 0.99   | 2.15   | 3.62   | 4.81   | 3.53   | 3.56  | 0.040926107 |
| Asa7G05725 | PREDICTED: starch synthase                                  | 0.84   | 1.04   | 0.99   | 0.96   | 1.82   | 2      | 2.7    | 2.17   | 2.27  | 0.041005122 |
| Asa1G00241 | Growth-regulating factor-like protein                       | 1.09   | 1.14   | 2.09   | 1.44   | 4.07   | 18.89  | 10.01  | 10.99  | 7.63  | 0.041005122 |
| Asa5G02939 | Transmembrane protein 209                                   | 0.53   | 0.81   | 1.01   | 0.78   | 1.51   | 3.31   | 1.87   | 2.23   | 2.85  | 0.041013448 |
| Asa1G04387 | protein DCL, chloroplastic-like                             | 2.66   | 1.6    | 2.41   | 2.22   | 3.45   | 6.24   | 6.53   | 5.41   | 2.43  | 0.041105961 |
| Asa7G02551 | Meiotic recombination protein SPO11-1                       | 0      | 0.17   | 0.08   | 0.08   | 0.37   | 1.43   | 0.95   | 0.92   | 11    | 0.041150794 |
| Asa1G02309 | Protein SHI RELATED SEQUENCE like                           | 0      | 0.07   | 0      | 0.02   | 0.08   | 1.48   | 0.98   | 0.85   | 36.29 | 0.04117441  |
| Asa5G03893 | Histone H3                                                  | 22.1   | 22.29  | 28.77  | 24.39  | 35.72  | 59.93  | 58.7   | 51.45  | 2.11  | 0.041221652 |
| Asa6G02525 | SOSS complex subunit B                                      | 1.42   | 1.85   | 0.8    | 1.36   | 3.76   | 3.76   | 4.54   | 4.02   | 2.96  | 0.041224973 |
| Asa5G04209 | Structural maintenance of chromosomes protein               | 0.41   | 0.32   | 0.21   | 0.31   | 0.77   | 1.59   | 1.49   | 1.28   | 4.1   | 0.041324912 |
| Asa6G05372 | Fmp27_GFWDK domain-containing protein                       | 0.3    | 0.31   | 0.36   | 0.32   | 0.73   | 0.67   | 0.64   | 0.68   | 2.1   | 0.04186169  |
| Asa8G02597 | C2H2-type domain-containing protein                         | 0.94   | 0.99   | 0.78   | 0.9    | 1.73   | 5.28   | 3.29   | 3.43   | 3.8   | 0.041907196 |
| Asa8G03193 | Zinc finger CCCH domain-containing protein                  | 100.5  | 91.71  | 98.77  | 96.99  | 191.39 | 216.04 | 307.49 | 238.31 | 2.46  | 0.04190817  |
| Asa7G01407 | Protein kinase family protein                               | 0.4    | 0.41   | 0.62   | 0.48   | 1.74   | 6.6    | 2.77   | 3.7    | 7.77  | 0.042144354 |
| Asa4G03734 | CSC1-like protein                                           | 0      | 0      | 0.01   | 0      | 0.14   | 0.08   | 0.2    | 0.14   | 42    | 0.042228525 |
| Asa3G02017 | High mobility group (HMG) box domain-<br>containing protein | 5.87   | 4.73   | 7.94   | 6.18   | 21.41  | 41.7   | 13.52  | 25.54  | 4.13  | 0.042282866 |
| Asa7G00656 | RING-type domain-containing protein                         | 9.46   | 11.22  | 11.71  | 10.8   | 18.77  | 24.96  | 30.89  | 24.87  | 2.3   | 0.042315866 |
| Asa3G03150 | protein RETICULATA-RELATED 3, chloroplastic-like            | 0.26   | 0.27   | 0.16   | 0.23   | 0.63   | 1.03   | 1.53   | 1.06   | 4.62  | 0.042315866 |
| Asa3G04655 | PHD domain-containing protein                               | 0.92   | 0.59   | 0.86   | 0.79   | 1.23   | 2.08   | 1.82   | 1.71   | 2.16  | 0.042321339 |
| Asa6G02716 | Unknown protein                                             | 3.88   | 4.63   | 2.9    | 3.8    | 7.28   | 10.74  | 6.13   | 8.05   | 2.12  | 0.042424266 |

|            |                                                          |         |         |         |         |        |         |         |         |       |             |
|------------|----------------------------------------------------------|---------|---------|---------|---------|--------|---------|---------|---------|-------|-------------|
| Asa5G03638 | Potassium channel                                        | 1.03    | 0.8     | 1.18    | 1       | 1.94   | 2.59    | 1.73    | 2.09    | 2.08  | 0.042551381 |
| Asa5G01398 | Receptor-like protein kinase                             | 0.1     | 0.15    | 0.22    | 0.16    | 0.91   | 2.48    | 0.71    | 1.37    | 8.72  | 0.042667166 |
| Asa2G00230 | Auxin response factor                                    | 0.75    | 0.53    | 1.04    | 0.77    | 1.53   | 1.82    | 1.83    | 1.73    | 2.23  | 0.042710682 |
| Asa0G05944 | DUF642 domain-containing protein                         | 0       | 0.33    | 0.33    | 0.22    | 1.24   | 2.6     | 4.61    | 2.82    | 12.8  | 0.042803136 |
| Asa7G06161 | SU(VAR)3-9 homolog 9                                     | 0.22    | 0.42    | 0.47    | 0.37    | 1.19   | 3.21    | 4.39    | 2.93    | 7.92  | 0.042923241 |
| Asa5G02794 | Glycosyltransferase                                      | 0.64    | 0       | 0.14    | 0.26    | 0.57   | 1.54    | 1.55    | 1.22    | 4.69  | 0.042962314 |
| Asa6G05444 | Pentatricopeptide repeat-containing protein              | 0.4     | 0.38    | 0.21    | 0.33    | 0.81   | 1.08    | 0.81    | 0.9     | 2.73  | 0.04307582  |
| Asa5G02318 | Coatomer subunit beta                                    | 1.62    | 1.6     | 2.16    | 1.79    | 4.18   | 4.25    | 3.18    | 3.87    | 2.16  | 0.043183504 |
| Asa3G04897 | Unknown protein                                          | 2.05    | 0.75    | 0.74    | 1.18    | 2.41   | 5.47    | 6.48    | 4.79    | 4.06  | 0.043249829 |
| Asa8G06050 | Inositol polyphosphate 5-phosphatase                     | 3.62    | 4.3     | 9.37    | 5.76    | 10.55  | 27.71   | 21.15   | 19.8    | 3.44  | 0.04325602  |
| Asa7G00403 | BHLH transcription factor                                | 0.42    | 0.68    | 1.16    | 0.75    | 2.28   | 1.96    | 2.21    | 2.15    | 2.85  | 0.04325602  |
| Asa3G02919 | Reductase                                                | 0.21    | 0.24    | 0.25    | 0.23    | 9.75   | 7.38    | 36.14   | 17.76   | 76.1  | 0.043277293 |
| Asa5G05289 | Fn3_like domain-containing protein                       | 1.19    | 2.05    | 2.58    | 1.94    | 3.44   | 8.89    | 7.13    | 6.49    | 3.34  | 0.04333939  |
| Asa4G03233 | Glycosyltransferase                                      | 0.63    | 0.46    | 0.48    | 0.52    | 1.44   | 2.89    | 1.07    | 1.8     | 3.44  | 0.043360151 |
| Asa6G01355 | Unknown protein                                          | 0.43    | 0       | 0       | 0.14    | 0.35   | 1.8     | 1.7     | 1.28    | 8.95  | 0.043476455 |
| Asa7G04695 | CST complex subunit CTC1                                 | 0.76    | 0.88    | 1.01    | 0.88    | 1.88   | 1.89    | 1.91    | 1.89    | 2.14  | 0.043640928 |
| Asa5G04308 | Kinesin motor domain-containing protein                  | 0.88    | 0.23    | 0.08    | 0.4     | 0.85   | 2.38    | 2.48    | 1.9     | 4.8   | 0.04371418  |
| Asa5G05557 | Alliinase                                                | 1592.73 | 1244.56 | 1732.15 | 1523.15 | 2498.4 | 3318.81 | 4043.38 | 3286.86 | 2.16  | 0.043781889 |
| Asa0G03022 | Microtubule-associated protein                           | 0.74    | 0.81    | 0.92    | 0.82    | 1.5    | 3.78    | 2.17    | 2.48    | 3.02  | 0.043812076 |
| Asa1G02783 | Cytomatrix family protein                                | 0.04    | 0.04    | 0       | 0.03    | 0.09   | 0.77    | 0.52    | 0.46    | 17.25 | 0.043873068 |
| Asa1G04797 | PMR5N domain-containing protein                          | 3.41    | 0.58    | 1.08    | 1.69    | 3.74   | 6.25    | 4.34    | 4.78    | 2.83  | 0.044110004 |
| Asa4G01592 | Receptor-like protein kinase                             | 2.34    | 1.79    | 2.2     | 2.11    | 4.05   | 18.73   | 16.05   | 12.94   | 6.13  | 0.044424482 |
| Asa5G05287 | CDT1 domain-containing protein                           | 0.38    | 0.47    | 0.46    | 0.44    | 0.85   | 3.15    | 2.19    | 2.06    | 4.73  | 0.044424482 |
| Asa4G02020 | Metacaspase                                              | 2.73    | 3.26    | 3.77    | 3.25    | 4.93   | 9.19    | 8.81    | 7.64    | 2.35  | 0.044538955 |
| Asa4G01265 | Kinesin-like protein                                     | 0.2     | 0.14    | 0.21    | 0.18    | 0.4    | 1.68    | 1.75    | 1.28    | 6.96  | 0.044573062 |
| Asa1G01461 | Toprim domain-containing protein                         | 0.48    | 0.77    | 1.24    | 0.83    | 3.19   | 3.08    | 1.95    | 2.74    | 3.3   | 0.044573062 |
| Asa3G02449 | 1-aminocyclopropane-1-carboxylate oxidase 1              | 0.35    | 1.52    | 2.56    | 1.48    | 8.24   | 4.84    | 4.28    | 5.79    | 3.92  | 0.044701371 |
| Asa4G05913 | bHLH-MYC_N domain-containing protein                     | 17.5    | 16.5    | 21.2    | 18.4    | 31.75  | 98.93   | 69.14   | 66.61   | 3.62  | 0.044705773 |
| Asa1G01232 | Histone H4                                               | 4.77    | 3.91    | 7.12    | 5.27    | 9.19   | 26.99   | 24.87   | 20.35   | 3.86  | 0.044707214 |
| Asa2G02077 | Proliferating cell nuclear antigen                       | 3.96    | 3.66    | 6.07    | 4.56    | 8.92   | 22.52   | 12.09   | 14.51   | 3.18  | 0.044793044 |
| Asa2G06157 | Pentatricopeptide repeat-containing protein              | 0.71    | 0.27    | 0.36    | 0.45    | 1.17   | 2.44    | 1.98    | 1.86    | 4.17  | 0.04486082  |
| Asa8G06218 | UvrD-like helicase ATP-binding domain-containing protein | 1.58    | 2.28    | 2.07    | 1.98    | 5.45   | 3.83    | 3.5     | 4.26    | 2.16  | 0.045170059 |
| Asa7G01323 | AB hydrolase-1 domain-containing protein                 | 0.6     | 0.66    | 0.66    | 0.64    | 1.21   | 2.22    | 2.08    | 1.84    | 2.87  | 0.045293163 |
| Asa3G01595 | WD_REPEATS_REGION domain-containing protein              | 1.87    | 1.62    | 1.35    | 1.61    | 3.1    | 3.72    | 5.12    | 3.98    | 2.47  | 0.045641654 |
| Asa2G01372 | Mads box protein, putative                               | 0       | 0       | 0.18    | 0.06    | 0.57   | 1.39    | 0.55    | 0.84    | 13.94 | 0.045689751 |
| Asa2G02821 | protein FLOWERING LOCUS T-like                           | 0.07    | 0.04    | 0       | 0.04    | 0.78   | 0.45    | 0.51    | 0.58    | 15.82 | 0.045774195 |
| Asa2G00765 | Protein kinase family protein                            | 0.06    | 0.07    | 0.1     | 0.08    | 0.18   | 1.76    | 1.25    | 1.06    | 13.87 | 0.045783104 |
| Asa4G06064 | Unknown protein                                          | 0.45    | 0.26    | 0.43    | 0.38    | 1.55   | 2.29    | 1.36    | 1.73    | 4.56  | 0.045815447 |
| Asa5G03069 | Unknown protein                                          | 3.97    | 1.4     | 2.11    | 2.49    | 6.84   | 5       | 7.98    | 6.61    | 2.65  | 0.046006218 |
| Asa2G04690 | BURP domain-containing protein                           | 7.74    | 1.92    | 6.59    | 5.42    | 17.61  | 47.62   | 16.7    | 27.31   | 5.04  | 0.046062145 |
| Asa8G00984 | Unknown protein                                          | 4.41    | 4.88    | 6.22    | 5.17    | 12.7   | 12.31   | 11.65   | 12.22   | 2.36  | 0.046212949 |
| Asa2G00830 | Unknown protein                                          | 1.09    | 0.47    | 0.42    | 0.66    | 1.86   | 3.21    | 2.29    | 2.45    | 3.72  | 0.046367211 |
| Asa4G02825 | Poly [ADP-ribose] polymerase                             | 7.49    | 7.39    | 6.78    | 7.22    | 11.28  | 15.25   | 17.86   | 14.8    | 2.05  | 0.04637538  |
| Asa8G03662 | Serine/threonine-protein kinase atr                      | 0       | 0.1     | 0.13    | 0.08    | 0.27   | 2.1     | 1.23    | 1.2     | 15.65 | 0.046700966 |
| Asa4G01611 | Regulator of chromosome condensation, RCC1               | 17.24   | 14.72   | 17.22   | 16.39   | 25.82  | 54.11   | 55.62   | 45.18   | 2.76  | 0.046700966 |
| Asa4G04779 | Transmembrane protein                                    | 0.04    | 0       | 0.06    | 0.03    | 0.05   | 1.42    | 1.06    | 0.84    | 25.3  | 0.046791793 |
| Asa1G04087 | Two-component response regulator                         | 0.8     | 0.79    | 0.82    | 0.8     | 3.17   | 1.61    | 2.19    | 2.32    | 2.89  | 0.04684146  |



|            |                                                     |         |        |        |         |         |         |         |        |       |             |
|------------|-----------------------------------------------------|---------|--------|--------|---------|---------|---------|---------|--------|-------|-------------|
| Asa4G03761 | Putative JHL23J11.5-like                            | 0.16    | 0.05   | 0      | 0.07    | 0.1     | 2.57    | 2.35    | 1.67   | 23.9  | 0.046874061 |
| Asa2G06443 | BHLH domain-containing protein                      | 1.04    | 1.23   | 2.23   | 1.5     | 2.59    | 6.04    | 4.15    | 4.26   | 2.84  | 0.046999213 |
| Asa3G01157 | BRCT domain-containing protein                      | 5.23    | 5.27   | 3.22   | 4.57    | 11.35   | 9.52    | 7.79    | 9.55   | 2.09  | 0.047176114 |
| Asa7G06926 | Unknown protein                                     | 1.54    | 0.75   | 1.55   | 1.28    | 2.8     | 4.04    | 4.13    | 3.66   | 2.86  | 0.047585094 |
| Asa2G00306 | Pentatricopeptide repeat-containing protein         | 10.57   | 10.92  | 10.05  | 10.51   | 19.9    | 23.45   | 32.32   | 25.22  | 2.4   | 0.047669387 |
| Asa6G01159 | Transcription factor like                           | 0       | 0      | 0      | 0       | 0       | 0.59    | 0.33    | 0.31   | 30.67 | 0.047669387 |
| Asa6G06200 | Flowering locus T                                   | 9.56    | 6.71   | 7.22   | 7.83    | 21.73   | 14.07   | 14.25   | 16.68  | 2.13  | 0.047687964 |
| Asa5G04605 | ABC transporter G family member 36 like             | 0.93    | 0.8    | 0.7    | 0.81    | 1.45    | 1.87    | 2.46    | 1.93   | 2.38  | 0.047710683 |
| Asa5G03328 | Pectinesterase                                      | 0.25    | 0.17   | 0.15   | 0.19    | 0.18    | 6.94    | 7.32    | 4.81   | 25.33 | 0.047788247 |
| Asa4G03357 | RING-type E3 ubiquitin transferase                  | 4.4     | 4.75   | 6.63   | 5.26    | 8.5     | 15.5    | 16.41   | 13.47  | 2.56  | 0.048164897 |
| Asa4G01917 | Putative transcription factor bHLH family           | 0.05    | 0.22   | 0.11   | 0.13    | 0.29    | 1       | 0.79    | 0.69   | 5.47  | 0.04870316  |
| Asa1G02073 | Histone H3                                          | 6.1     | 6.92   | 8.47   | 7.16    | 11      | 25.43   | 17.96   | 18.13  | 2.53  | 0.048903209 |
| Asa2G06961 | Glycosyltransferase                                 | 1.78    | 1.84   | 1.73   | 1.78    | 7.94    | 16.01   | 29.22   | 17.72  | 9.94  | 0.0492684   |
| Asa7G05183 | Cytochrome P450 family protein                      | 2.37    | 1.98   | 2.32   | 2.22    | 6.87    | 11.78   | 19.32   | 12.66  | 5.69  | 0.049269529 |
| Asa7G01788 | Histone H2B                                         | 7.01    | 9.16   | 11.5   | 9.22    | 16.64   | 50.38   | 47.45   | 38.16  | 4.14  | 0.049477132 |
| Asa0G03497 | NB-ARC domain-containing disease resistance protein | 1.27    | 0.97   | 1.21   | 1.15    | 3.97    | 7.79    | 2.41    | 4.72   | 4.11  | 0.049489168 |
| Asa0G03146 | Heat stress transcription factor b-4-like protein   | 0       | 0.03   | 0.04   | 0.02    | 0.19    | 1.09    | 0.43    | 0.57   | 24.43 | 0.049522033 |
| Asa2G03269 | Pentatricopeptide repeat                            | 0.32    | 0.35   | 0.55   | 0.41    | 0.86    | 1.01    | 1.14    | 1      | 2.47  | 0.049646289 |
| Asa5G01628 | BHLH transcription factor                           | 1.97    | 0.7    | 2.33   | 1.67    | 3.39    | 6.04    | 3.83    | 4.42   | 2.65  | 0.049652698 |
| Asa5G05561 | Alliinase                                           | 1244.52 | 984.39 | 1343.3 | 1190.74 | 1872.93 | 2512.33 | 2990.83 | 2458.7 | 2.06  | 0.04978594  |
| Asa5G04158 | Histone H3                                          | 9.14    | 10.21  | 11.46  | 10.27   | 17.5    | 41.25   | 24.03   | 27.59  | 2.69  | 0.04984138  |
| Asa4G06179 | GRF1-interacting factor 1                           | 4.25    | 3.91   | 3.26   | 3.81    | 7.69    | 42.49   | 40.67   | 30.28  | 7.96  | 0.04984138  |
