# Supplementary material for: Using Principal Component Analysis and RNA-Seq to Identify Candidate Genes That Control Salt Tolerance in Garlic (Allium sativum L.)
Source: MDPI journal article supplement (doi:10.3390/agronomy11040691), 2021-04-05
Supplement: s1 [file s1]

**Supplementary Table S2. Summary statistics of the RNA-seq results**

| Samples                       | Raw reads   | Cleaned reads |       | rRNA reads |      | Final cleaned reads | Mapped reads |           |            |         |
|-------------------------------|-------------|---------------|-------|------------|------|---------------------|--------------|-----------|------------|---------|
|                               |             | #             | %     | #          | %    |                     | Unique       | multiple  | Total      | %mapped |
| Resistant leaf control rep1   | 49,226,780  | 47,543,251    | 96.58 | 319,936    | 0.67 | 47,223,315          | 22,257,867   | 3,286,811 | 25,544,678 | 54.09   |
| Resistant leaf control rep2   | 79,317,748  | 76,531,677    | 96.49 | 513,733    | 0.67 | 76,017,944          | 38,441,159   | 5,870,726 | 44,311,885 | 58.29   |
| Resistant leaf control rep3   | 64,657,055  | 62,133,479    | 96.1  | 425,904    | 0.69 | 61,707,575          | 28,964,579   | 4,361,891 | 33,326,470 | 54.01   |
| Resistant leaf salt rep1      | 51,448,894  | 49,792,002    | 96.78 | 141,978    | 0.29 | 49,650,024          | 18,008,976   | 2,562,746 | 20,571,722 | 41.43   |
| Resistant leaf salt rep2      | 98,970,867  | 95,620,630    | 96.61 | 259,330    | 0.27 | 95,361,300          | 38,792,410   | 5,499,268 | 44,291,678 | 46.45   |
| Resistant leaf salt rep3      | 60,308,491  | 58,232,105    | 96.56 | 190,259    | 0.33 | 58,041,846          | 18,189,347   | 3,075,096 | 21,264,443 | 36.64   |
| Resistant root control rep1   | 71,739,357  | 69,180,548    | 96.43 | 297,516    | 0.43 | 68,883,032          | 43,071,394   | 7,949,852 | 51,021,246 | 74.07   |
| Resistant root control rep2   | 76,364,326  | 73,622,950    | 96.41 | 431,117    | 0.59 | 73,191,833          | 48,935,335   | 7,107,071 | 56,042,406 | 76.57   |
| Resistant root control rep3   | 37,307,108  | 35,987,945    | 96.46 | 351,542    | 0.98 | 35,636,403          | 21,713,942   | 4,201,448 | 25,915,390 | 72.72   |
| Resistant root salt rep1      | 80,187,388  | 77,717,794    | 96.92 | 438,977    | 0.56 | 77,278,817          | 34,946,168   | 4,821,196 | 39,767,364 | 51.46   |
| Resistant root salt rep2      | 46,781,439  | 45,450,412    | 97.15 | 213,282    | 0.47 | 45,237,130          | 22,441,700   | 3,093,842 | 25,535,542 | 56.45   |
| Resistant root salt rep3      | 129,457,316 | 125,410,753   | 96.87 | 590,774    | 0.47 | 124,819,979         | 51,604,593   | 7,103,618 | 58,708,211 | 47.03   |
| Susceptible leaf control rep1 | 24,671,932  | 17,576,456    | 71.24 | 134,237    | 0.76 | 17,442,219          | 8,246,759    | 1,289,882 | 9,536,641  | 54.68   |
| Susceptible leaf control rep2 | 87,363,897  | 84,629,969    | 96.87 | 487,222    | 0.58 | 84,142,747          | 42,521,427   | 6,543,166 | 49,064,593 | 58.31   |
| Susceptible leaf control rep3 | 52,801,685  | 50,882,546    | 96.37 | 344,928    | 0.68 | 50,537,618          | 23,411,383   | 3,594,653 | 27,006,036 | 53.44   |
| Susceptible leaf salt rep1    | 48,950,647  | 47,100,654    | 96.22 | 370,524    | 0.79 | 46,730,130          | 21,930,149   | 3,900,472 | 25,830,621 | 55.28   |
| Susceptible leaf salt rep2    | 48,844,904  | 47,091,814    | 96.41 | 169,877    | 0.36 | 46,921,937          | 18,854,248   | 2,985,287 | 21,839,535 | 46.54   |
| Susceptible leaf salt rep3    | 77,506,694  | 74,924,909    | 96.67 | 616,986    | 0.82 | 74,307,923          | 36,433,361   | 6,659,960 | 43,093,321 | 57.99   |
| Susceptible root control rep1 | 67,925,396  | 65,931,302    | 97.06 | 416,336    | 0.63 | 65,514,966          | 33,554,104   | 6,005,340 | 39,559,444 | 60.38   |
| Susceptible root control rep2 | 25,084,732  | 19,423,404    | 77.43 | 257,423    | 1.33 | 19,165,981          | 10,395,370   | 1,719,784 | 12,115,154 | 63.21   |
| Susceptible root control rep3 | 52,153,620  | 50,533,048    | 96.89 | 420,664    | 0.83 | 50,112,384          | 26,189,506   | 3,967,343 | 30,156,849 | 60.18   |
| Susceptible root salt rep1    | 47,984,848  | 46,641,232    | 97.2  | 273,588    | 0.59 | 46,367,644          | 27,292,958   | 4,052,121 | 31,345,079 | 67.6    |
| Susceptible root salt rep2    | 62,264,409  | 60,288,734    | 96.83 | 339,476    | 0.56 | 59,949,258          | 32,206,522   | 4,574,615 | 36,781,137 | 61.35   |
| Susceptible root salt rep3    | 62,503,692  | 60,653,457    | 97.04 | 299,473    | 0.49 | 60,353,984          | 22,195,264   | 3,178,617 | 25,373,881 | 42.04   |
